# Supplementary material
Source: PubMed Central journal article supplement (PMC3617938)
Supplement: supp_M030650_M030650_Supplemental_material_proof.pdf [file supp_M030650_M030650_Supplemental_material_proof.pdf]

## **FIGURE LEGENDS FOR SUPPLEMENTAL FIGURES**

### **Figure S1 Immunophenotype of hBMSCs**

The immunophenotype of hBMSCs of the young and old donors was analysed by flow cytometry. Representative histograms from passage 4 are presented. Fluorescent intensities of surface antigens (filled grey histograms) are compared with appropriate isotype controls for each antibody (open light grey histograms). There were no age-associated differences in the immunophenotype of hBMSCs from the young or the old donors.

### **Figure S2 Measurement of telomere length of hBMSCs**

Southern plot of terminal restriction factors (TRF) in early and late passage hBMSCs. 2  $\mu$ g of DNA was digested with Hinf1/RsaI enzymes and separated on 0.8% agarose gel. DNA was transferred to a membrane and probed with a telomeric probe (TTAGGG repeats). Numbers on the left refers to molecular weight marker (MWM) in kb. Lane 1 contains internal reference standard. The autoradiogram was scanned by densitometry and TRF length was calculated using ImageJ analysis software according to  $TRF = \frac{\sum OD}{\sum (OD_i/L_i)}$ , where  $OD_i$  is optical density and  $L_i$  is the length of the TRF at position  $i$ . TRF signals between 3 and 20 kb were used for telomere length measurements.

### **Figure S3 The proportion (mol%) of lysophosphatidylcholine (lysoPC) from early to late passages of the hBMSCs**

A. Young (n=5) and B. Old donors (n=5).

### **Figure S4 The proportion (mol%) of FAs from early to late passages of hBMSCs**

A. Young (n=5) and B. Old donors (n=5).

Old donor 271

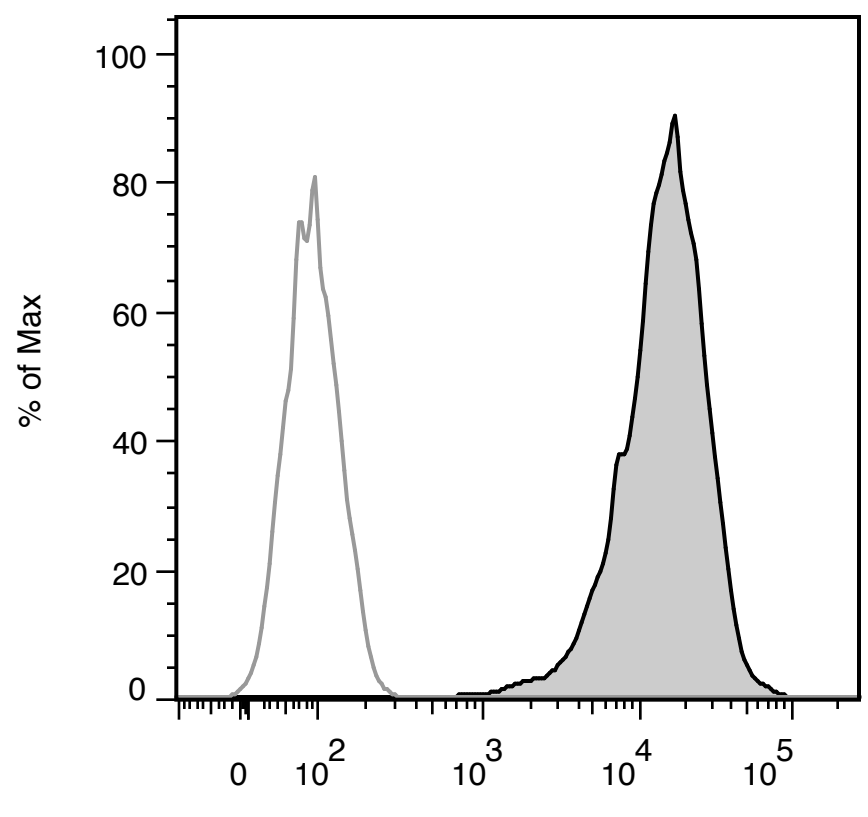

CD29-APC

Young donor 081

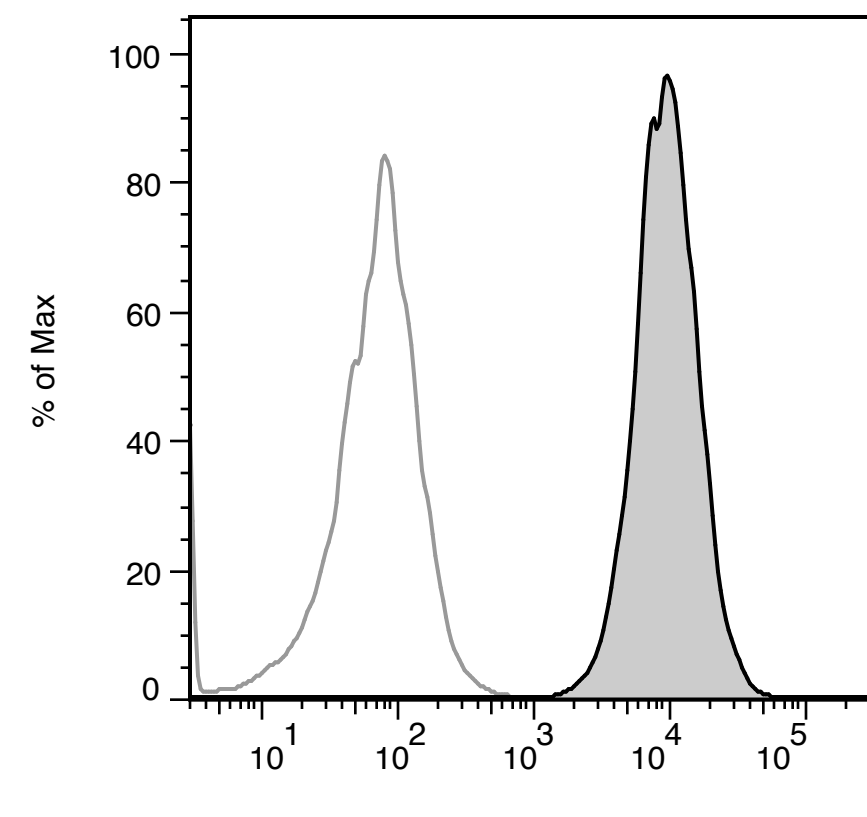

CD29-APC

Old donor 271

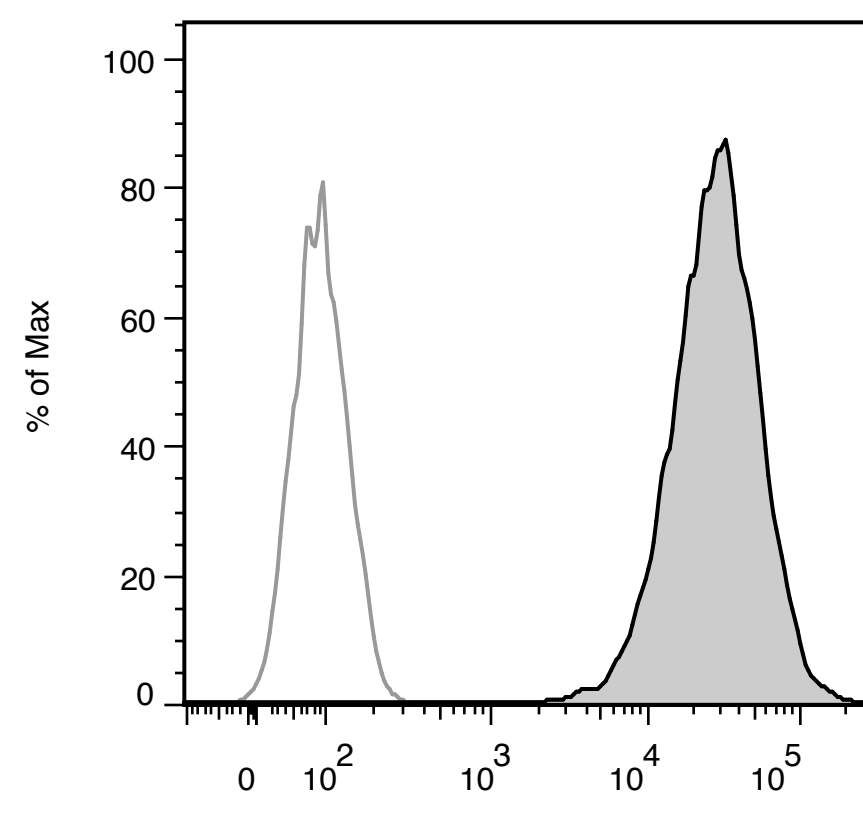

CD13-APC

Young donor 081

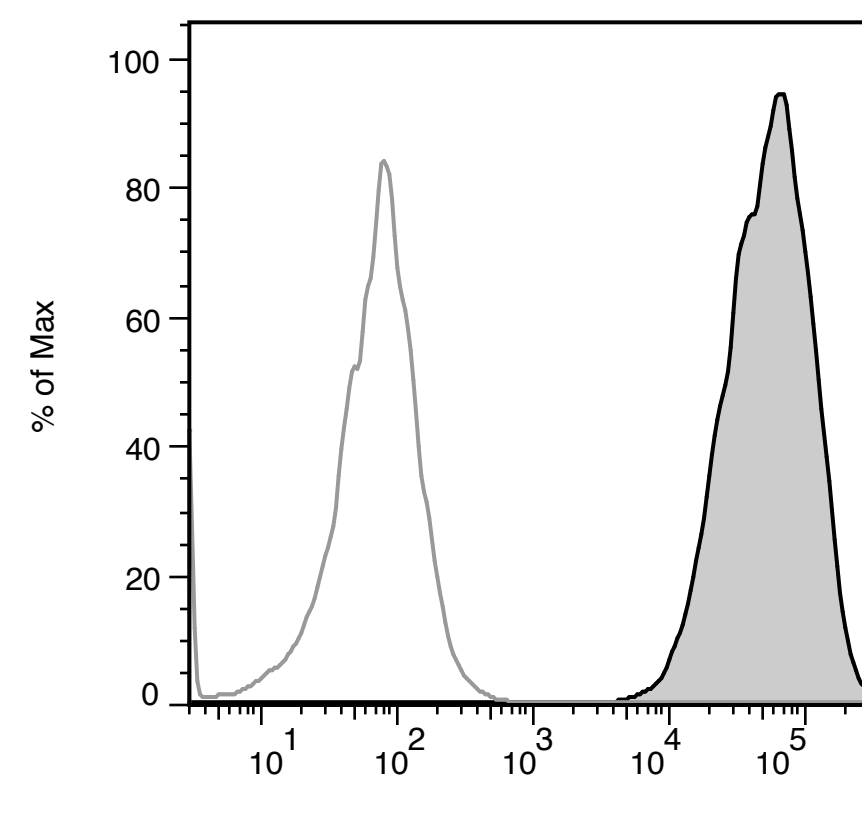

CD13-APC

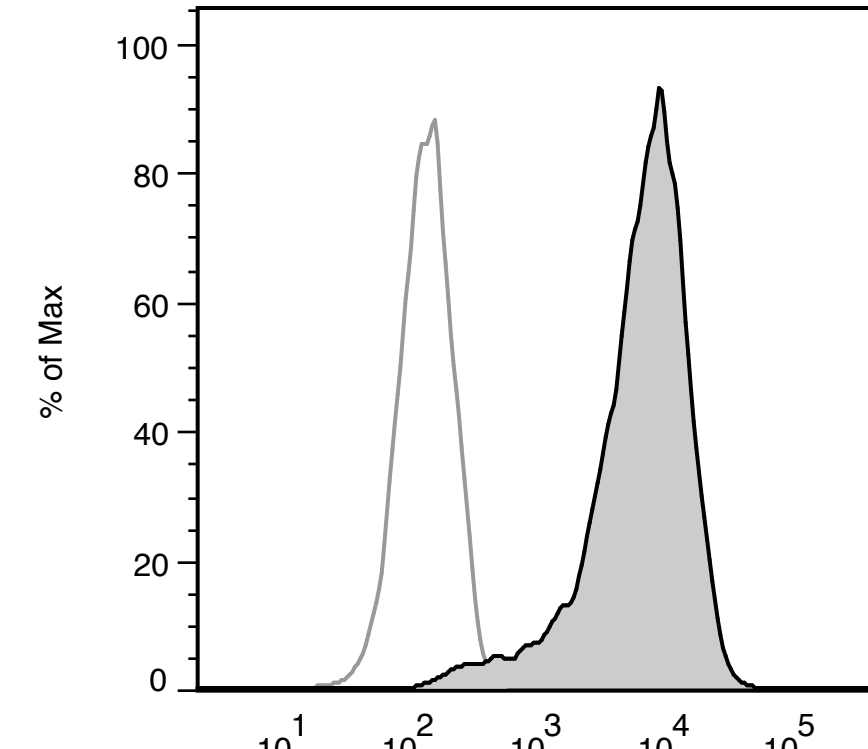

CD44-FITC

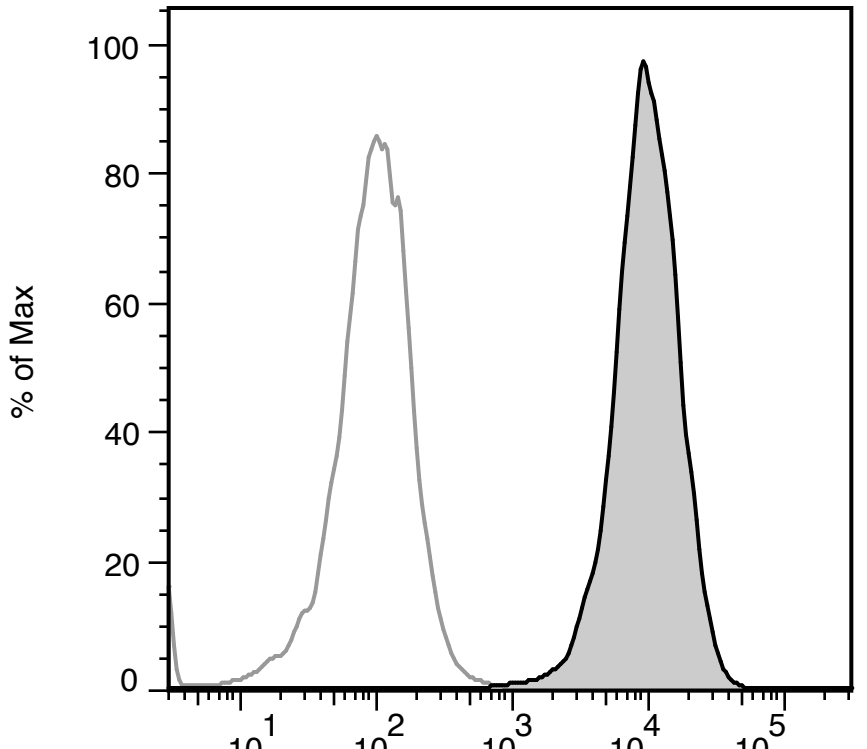

CD44-FITC

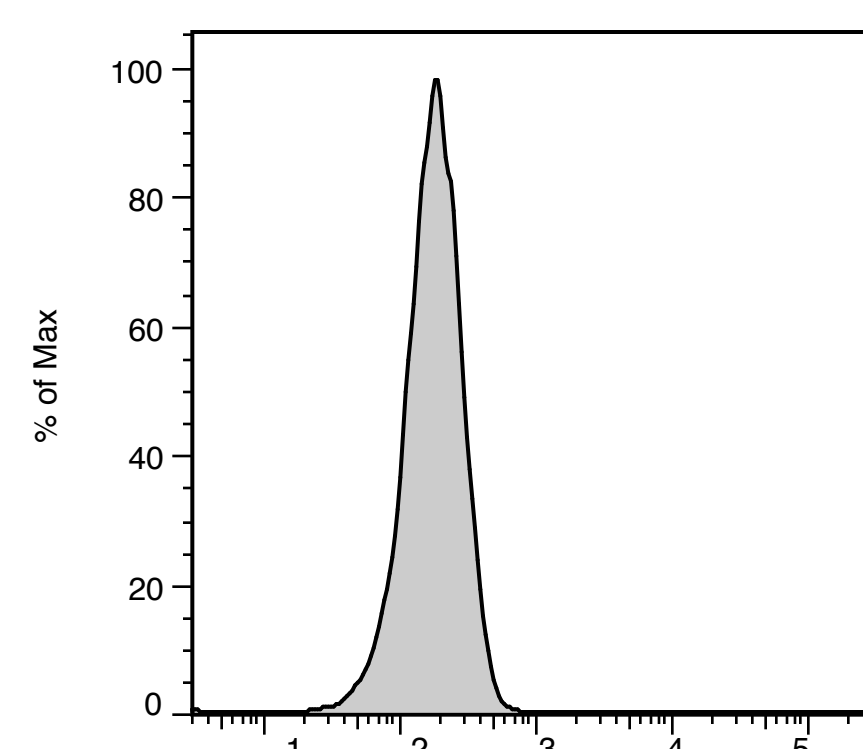

CD14-PE

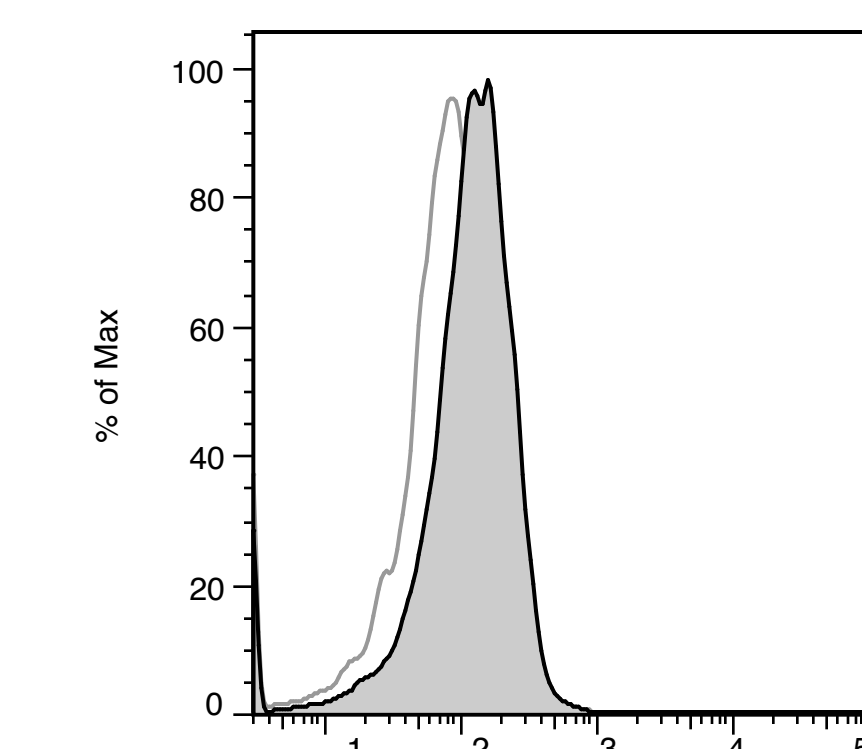

CD14-PE

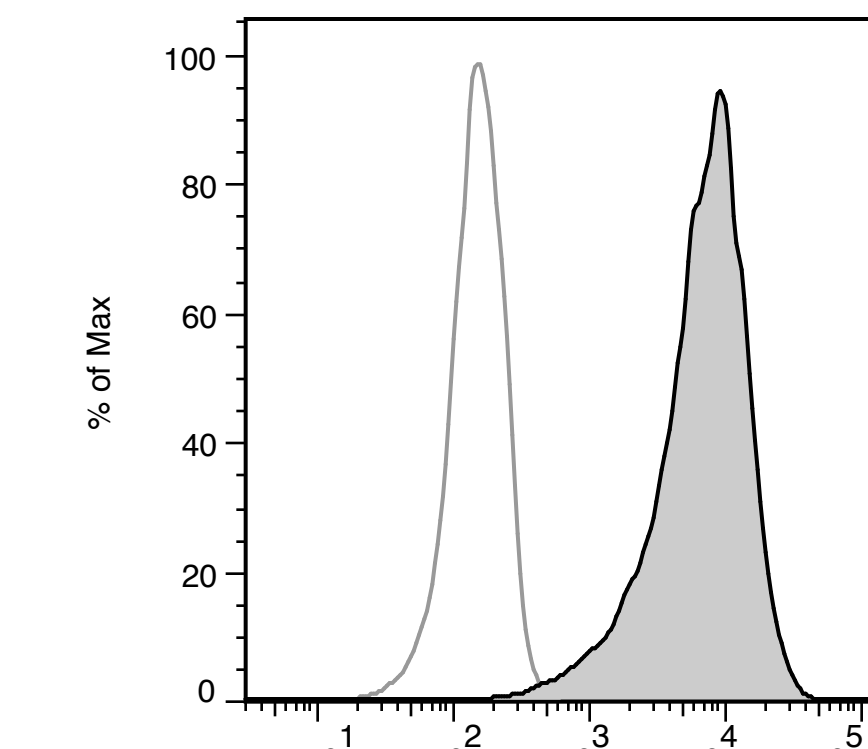

CD49e-PE

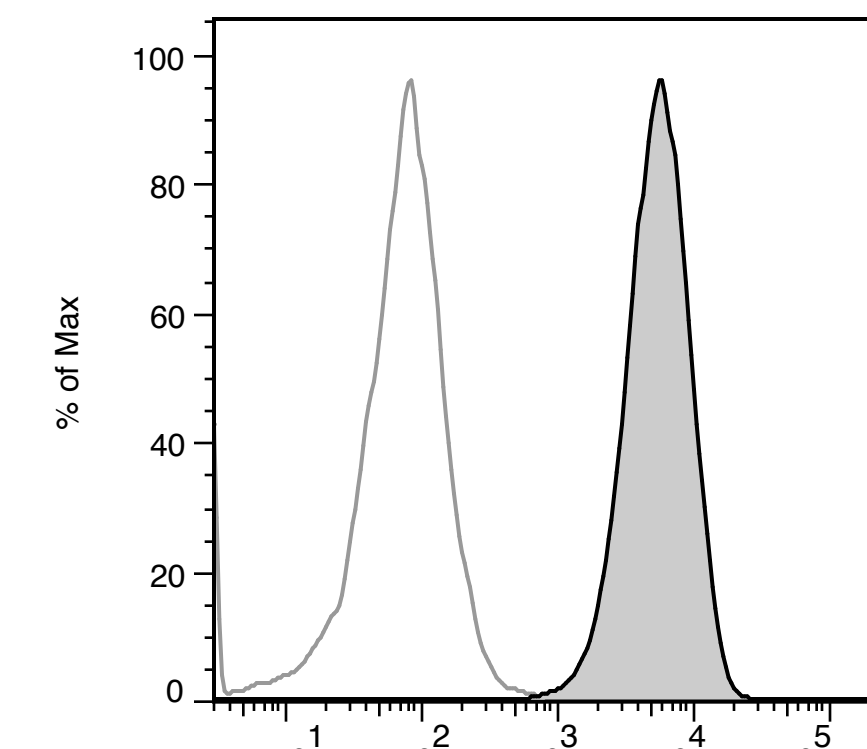

CD49e-PE

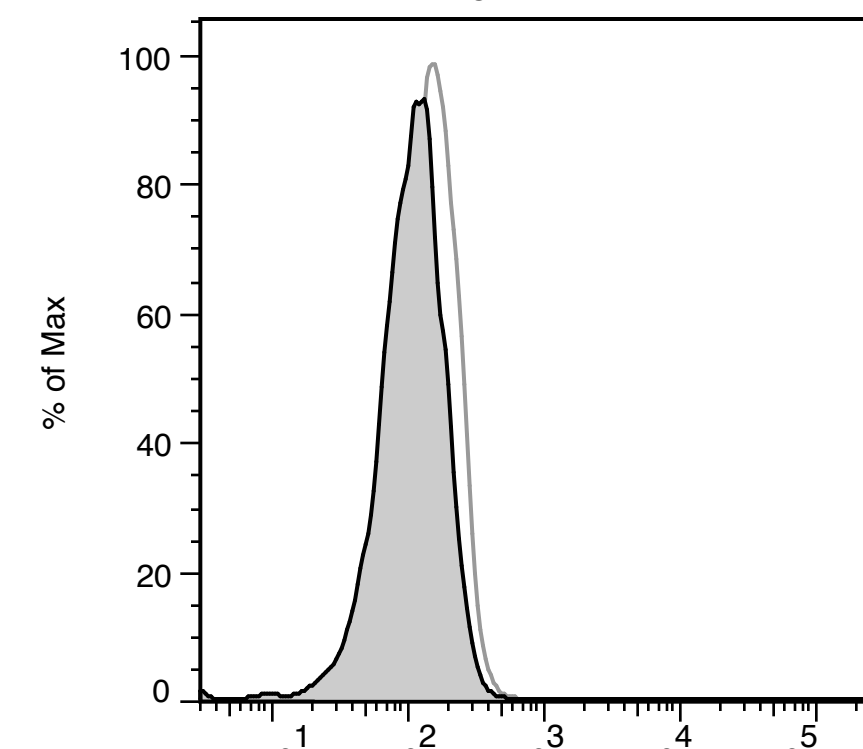

CD19-PE

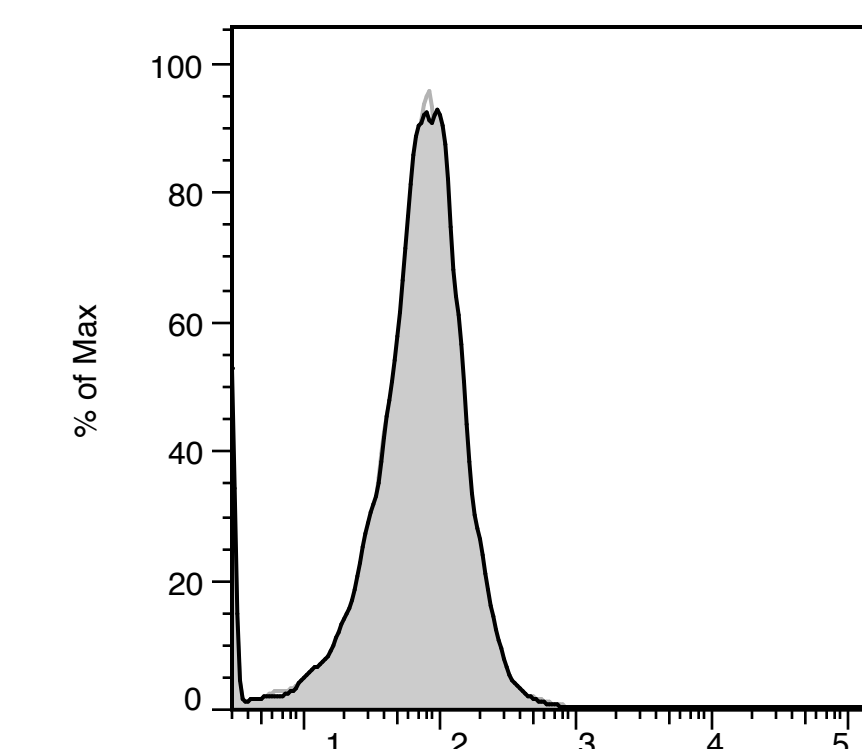

CD19-PE

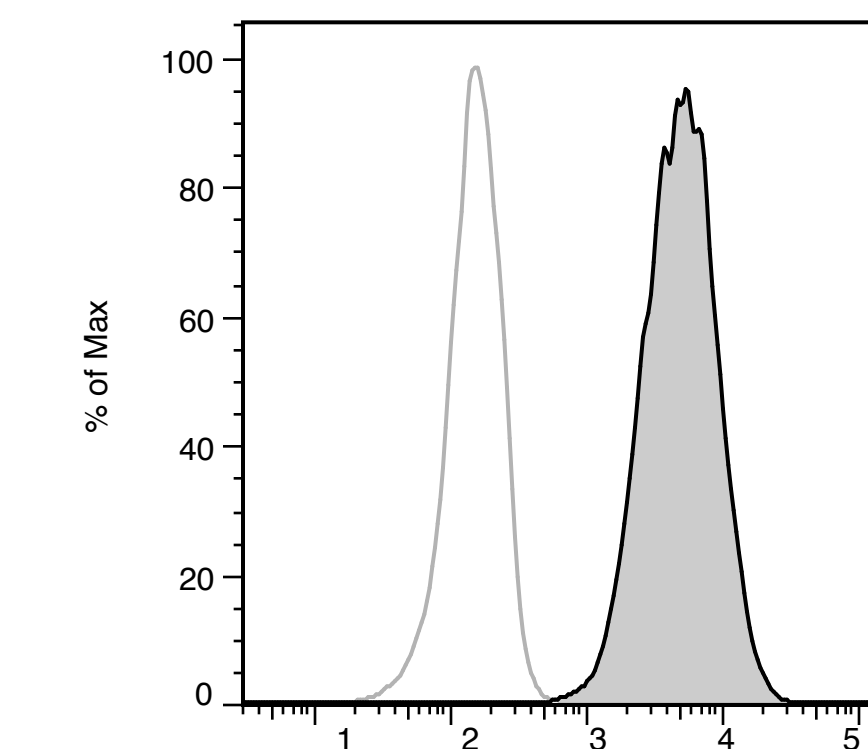

CD73-PE

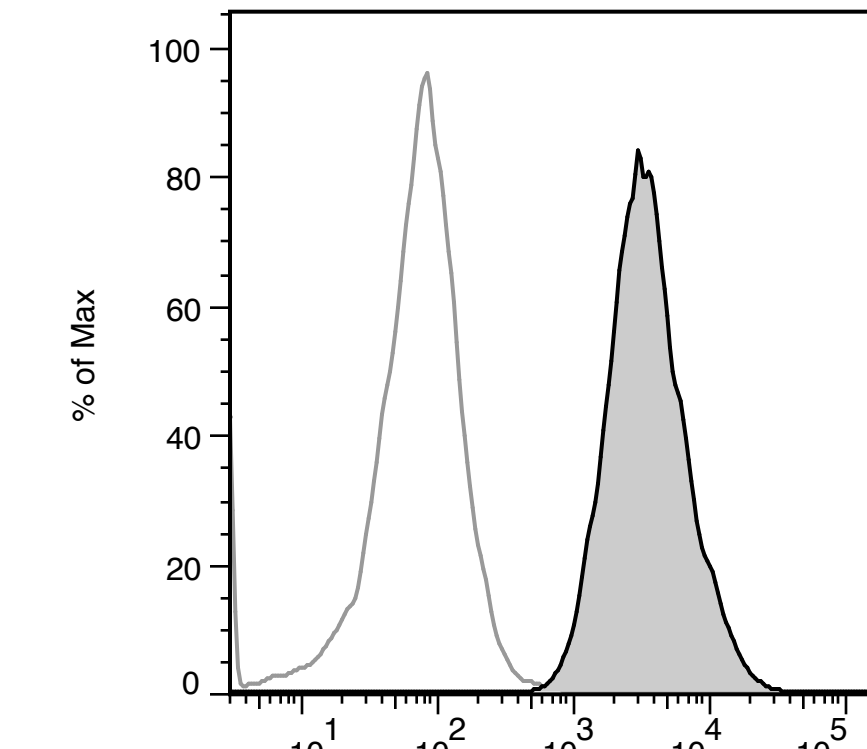

CD73-PE

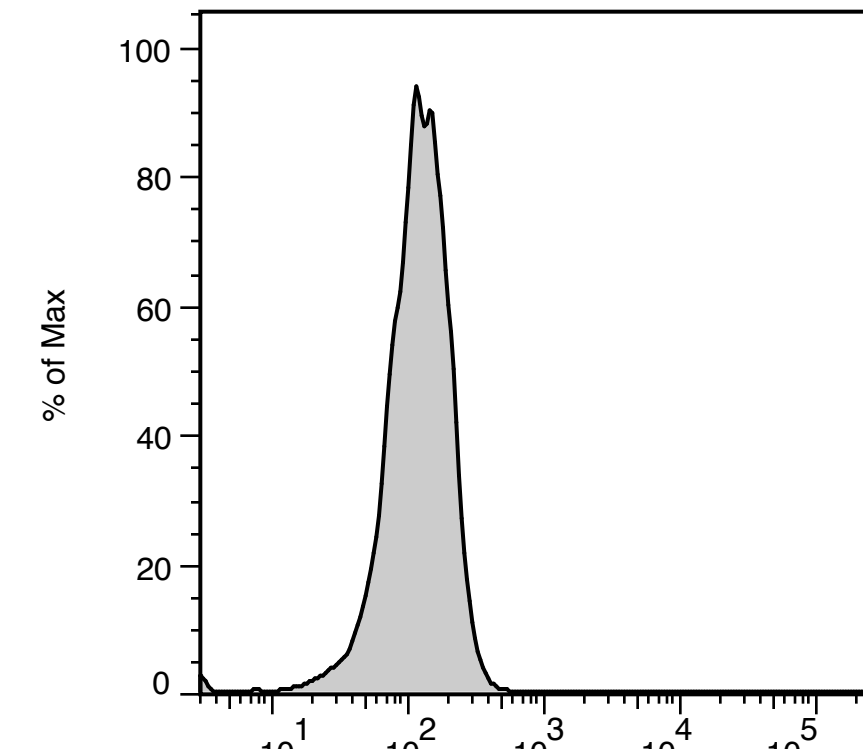

CD34-PE

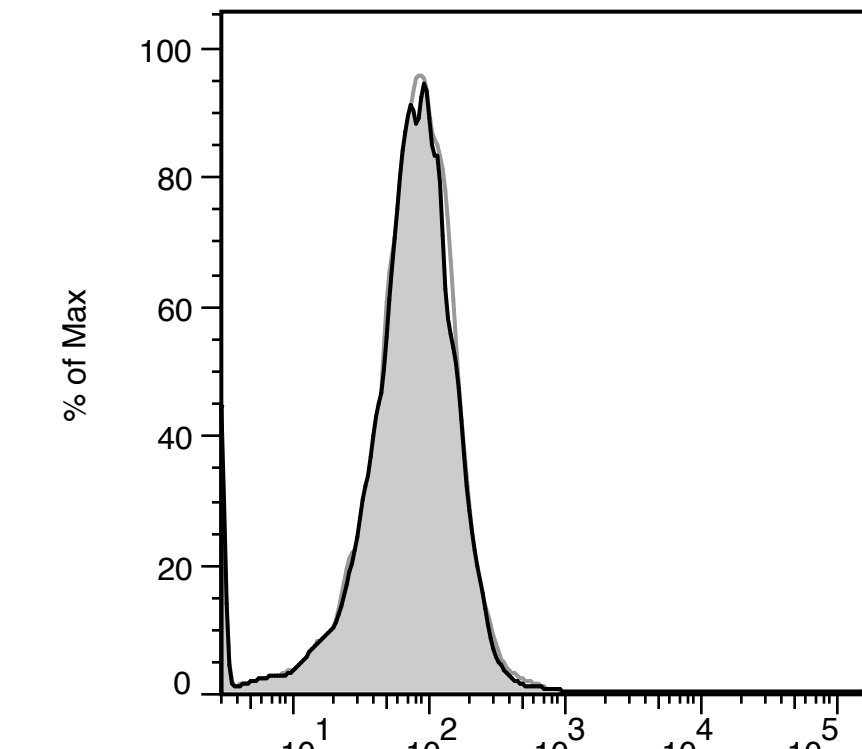

CD34-PE

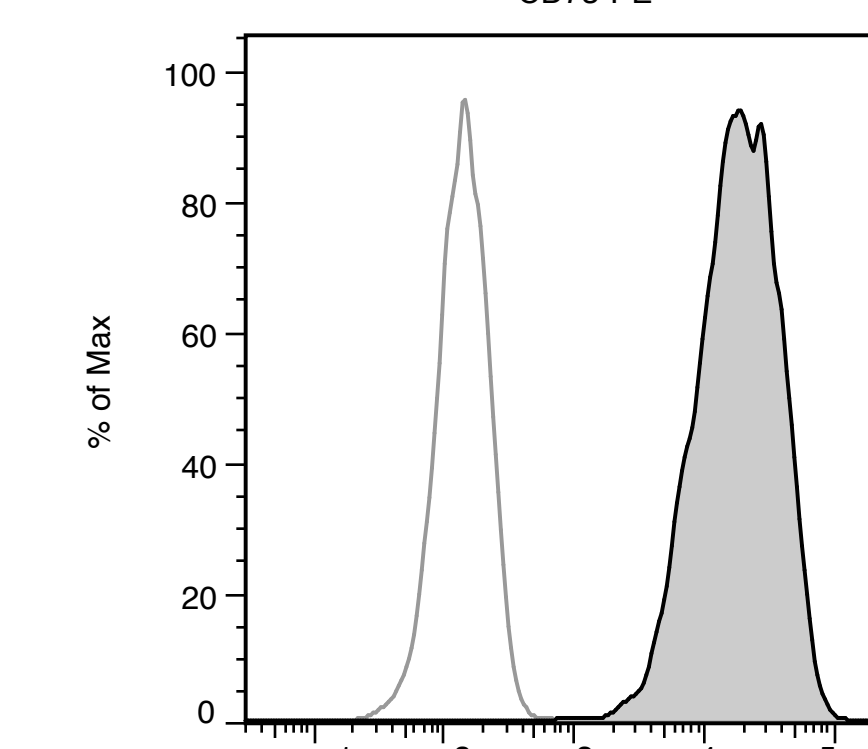

CD90-FITC

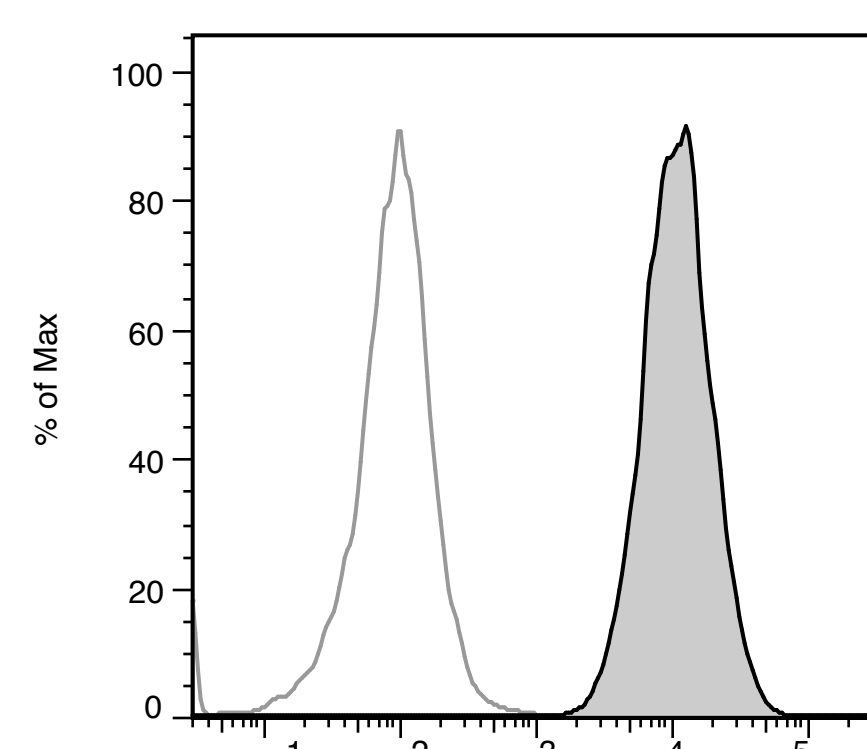

CD90-FITC

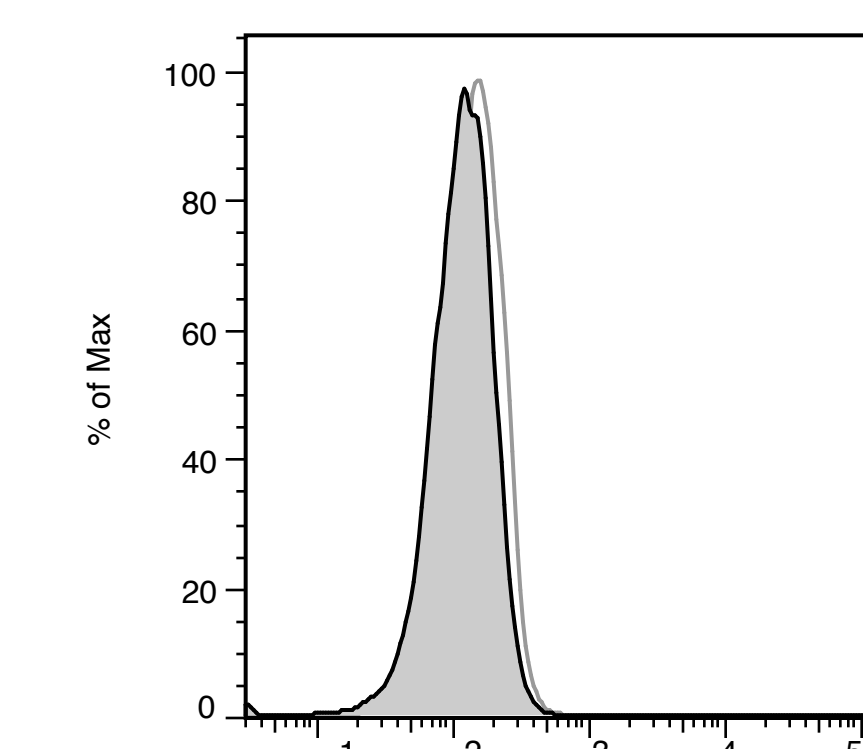

CD45-PE

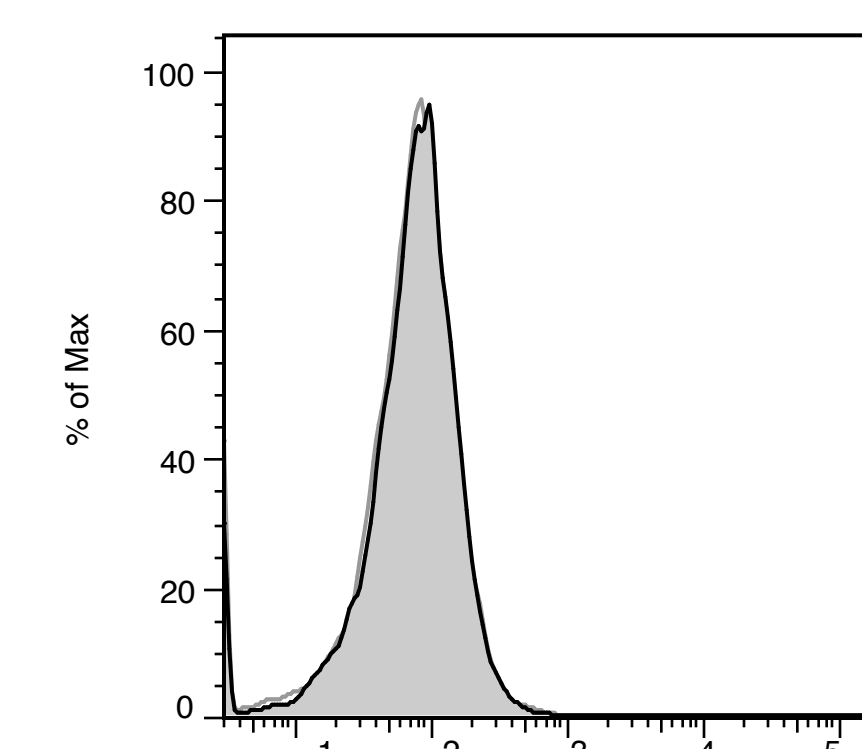

CD45-PE

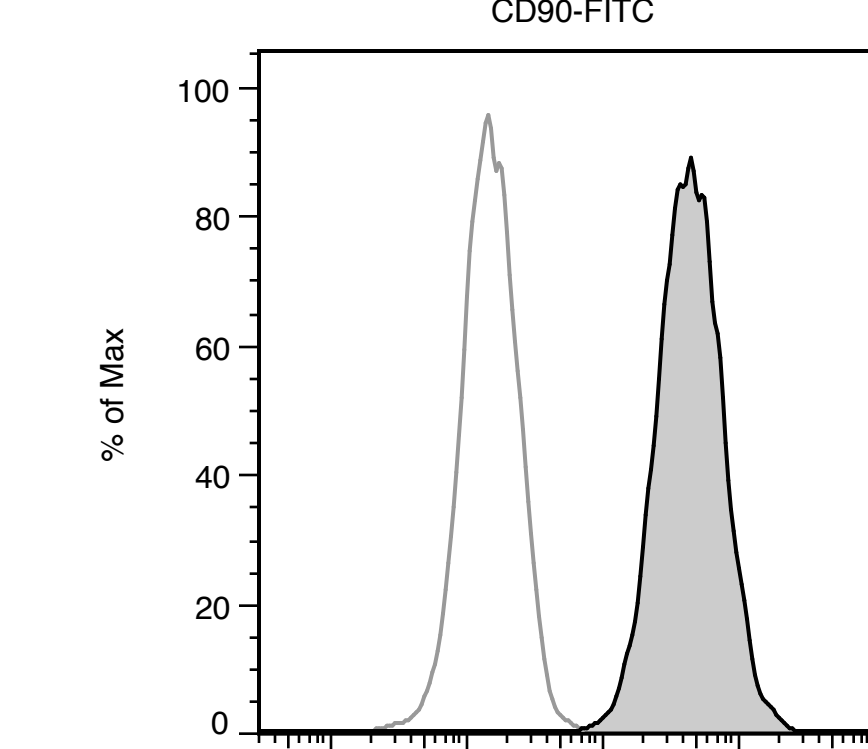

CD105-FITC

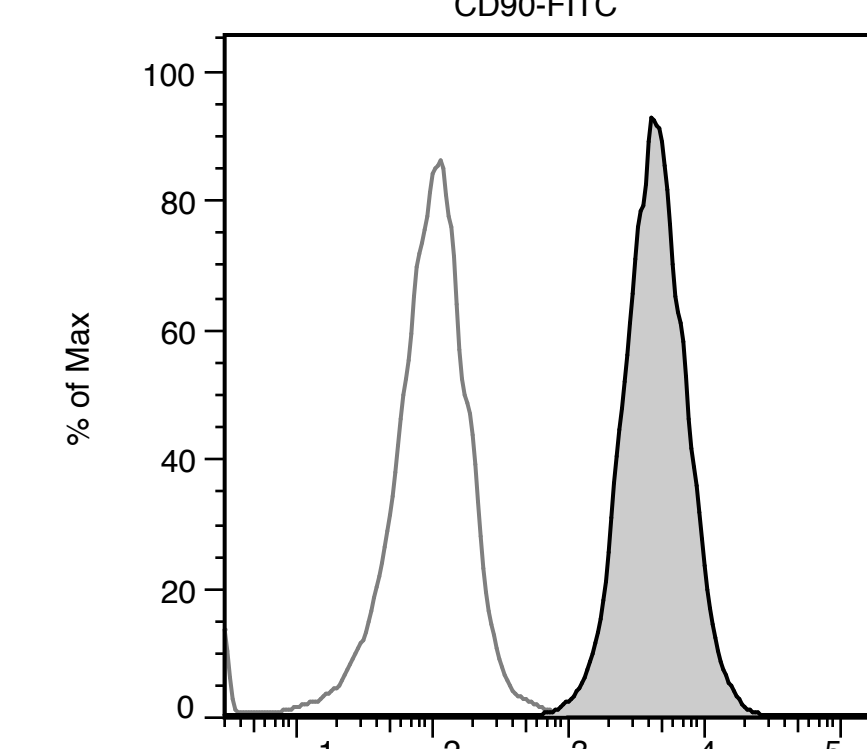

CD105-FITC

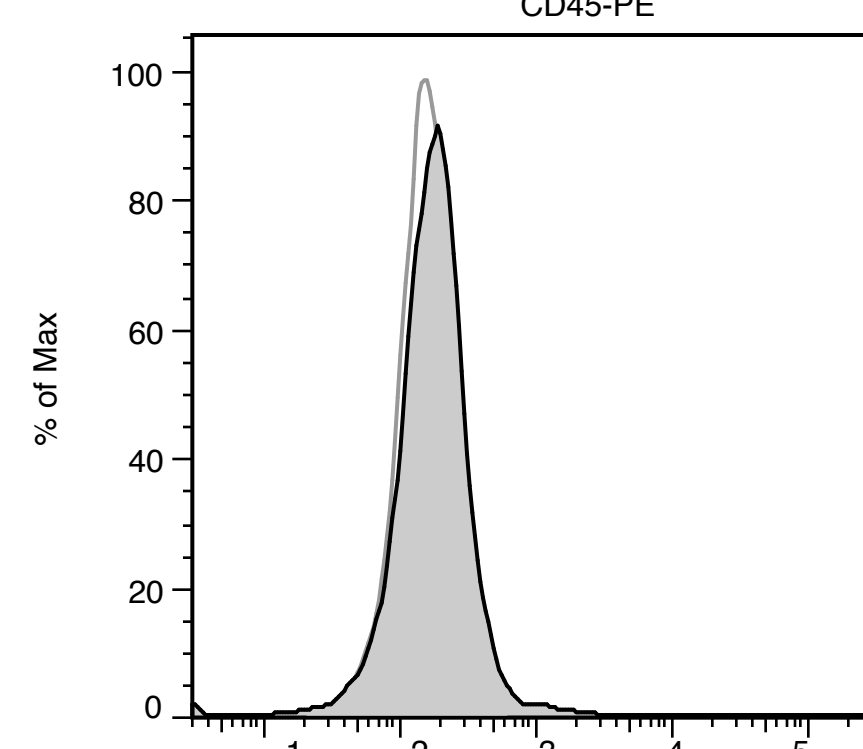

CD271-PE

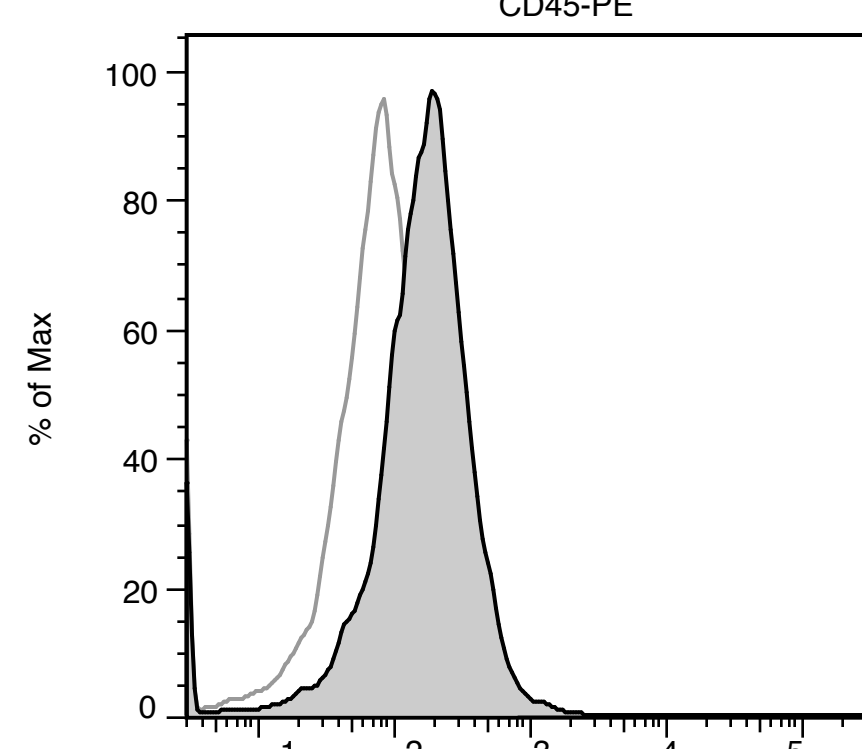

CD271-PE

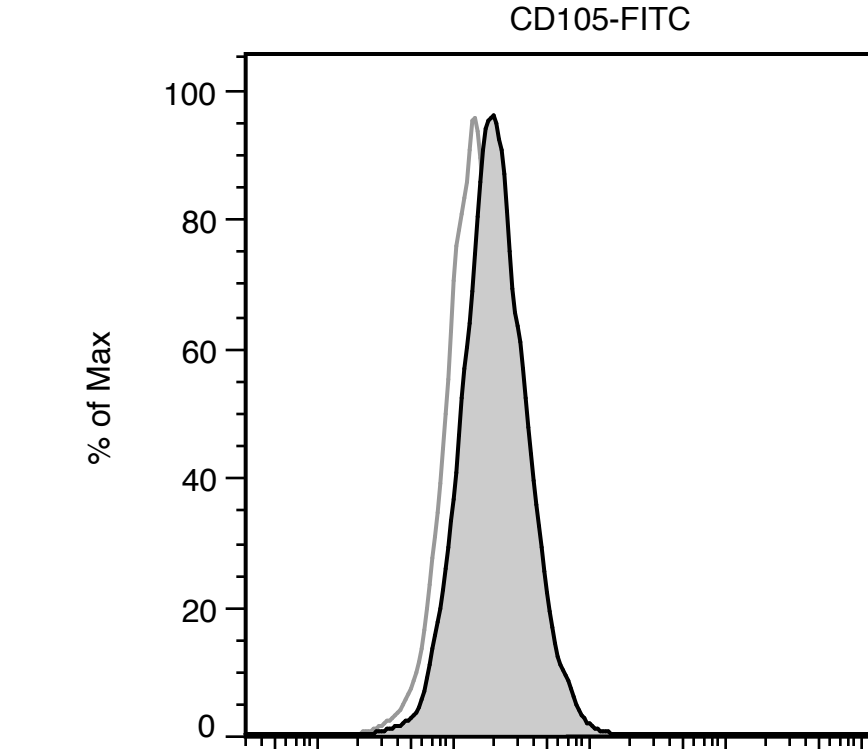

CD106-FITC

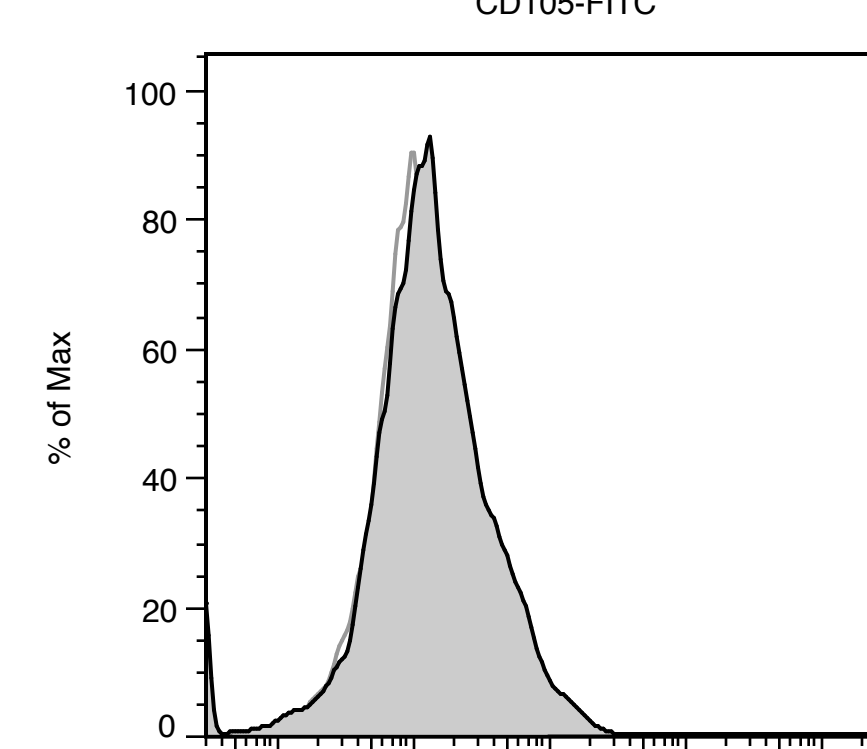

CD106-FITC

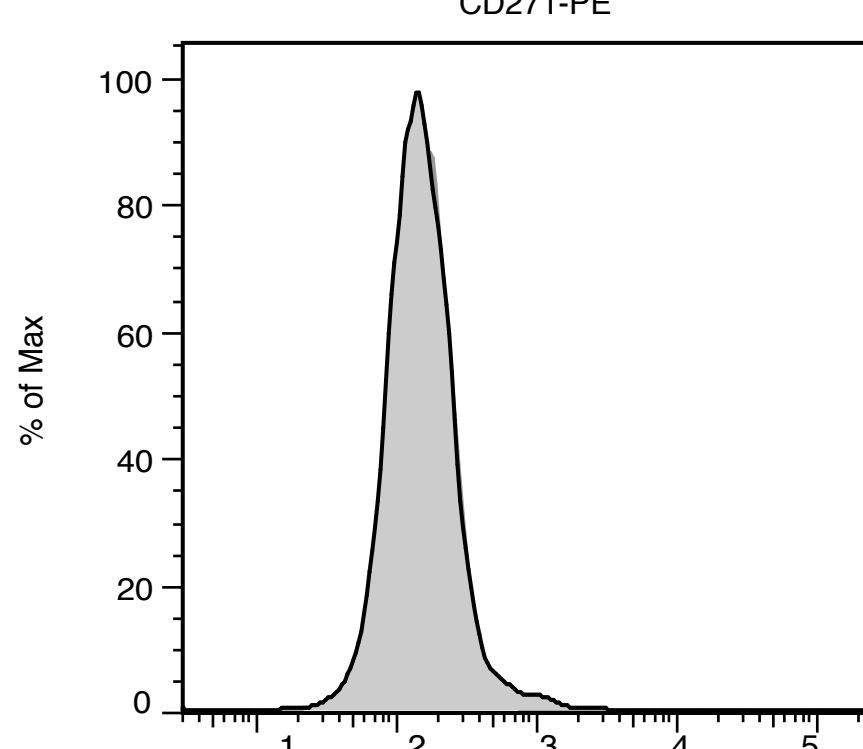

HLA-DR-FITC

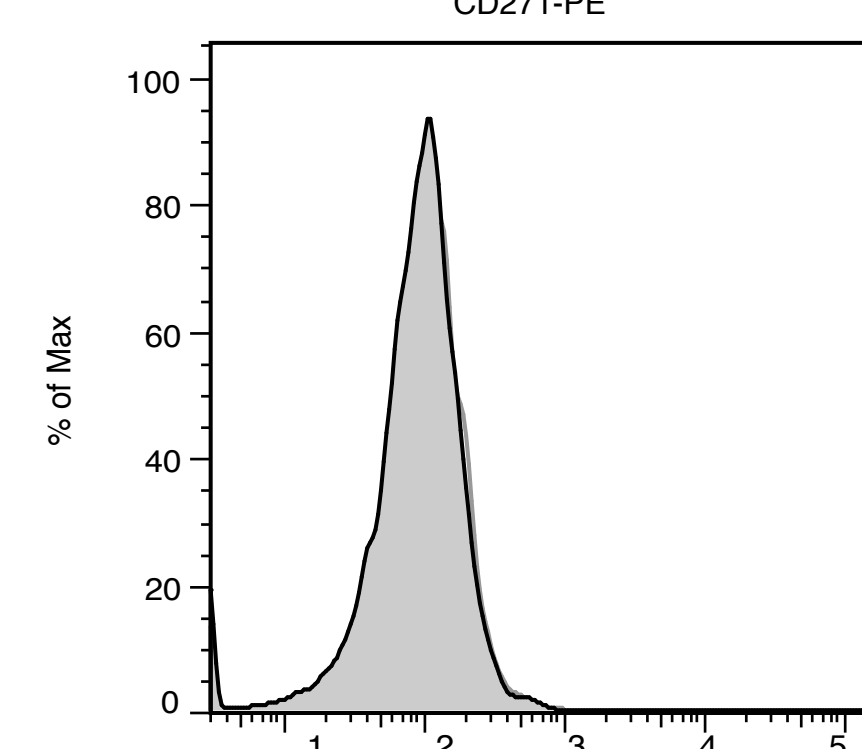

HLA-DR-FITC

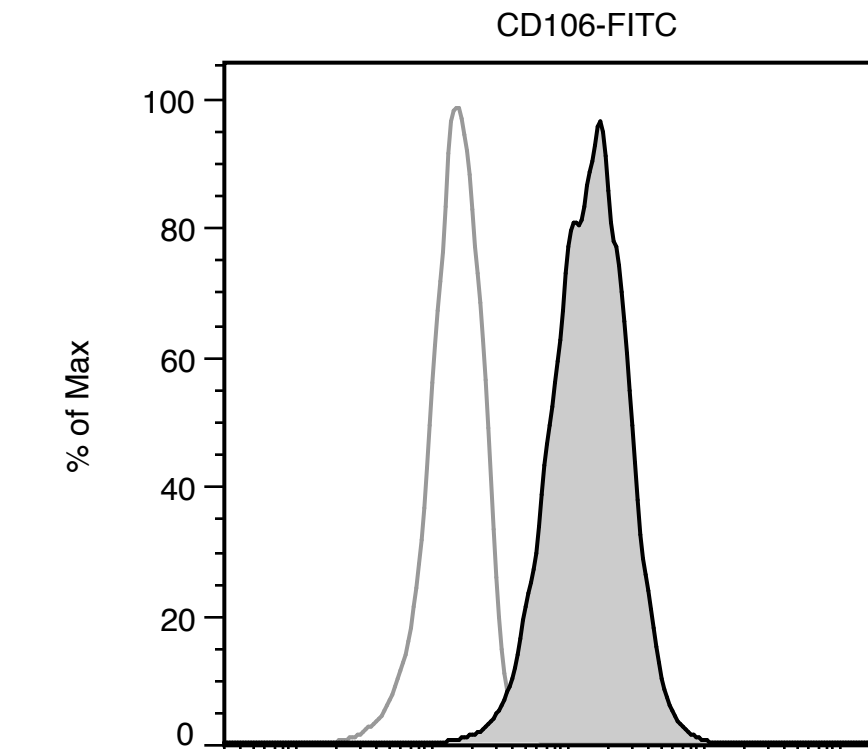

CD166-PE

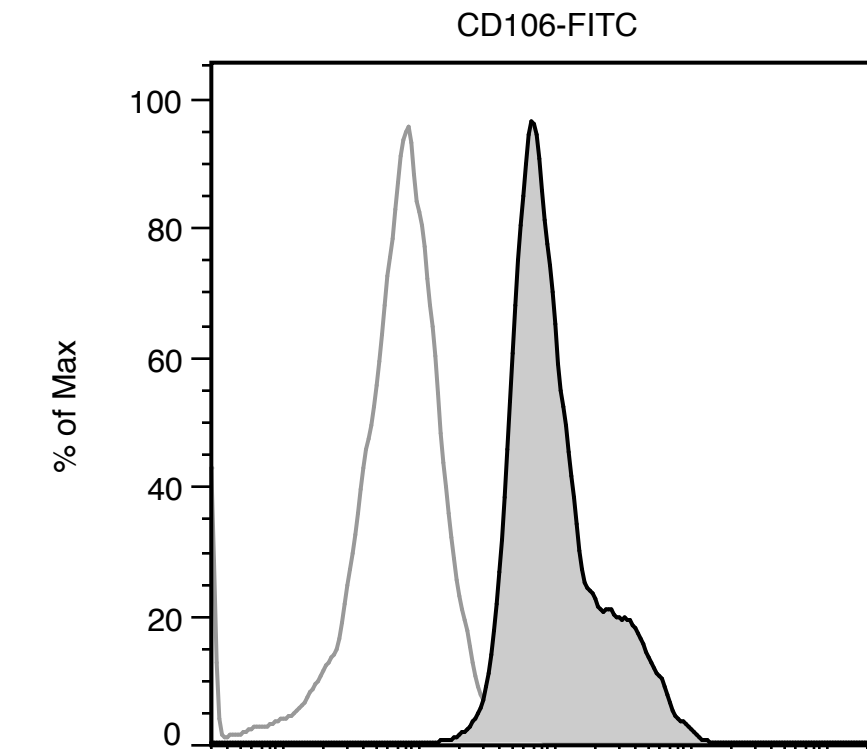

CD166-PE

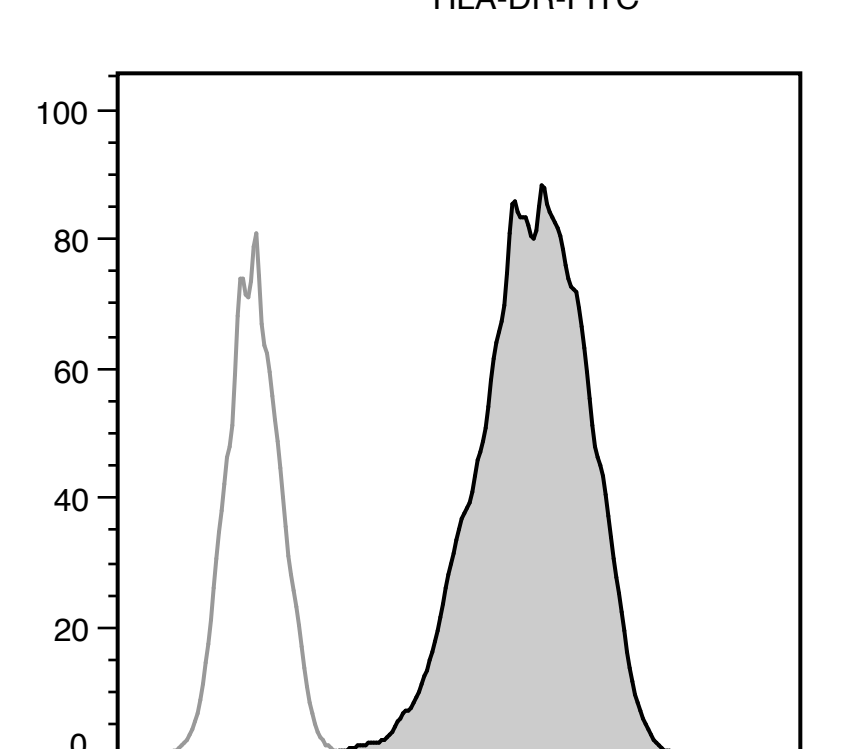

HLA-ABC-APC

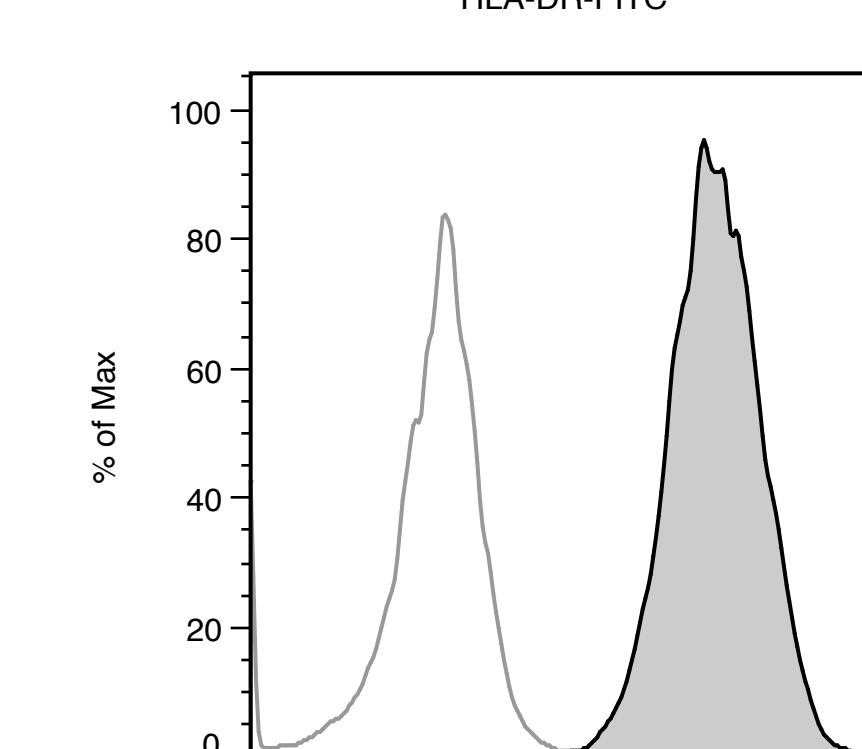

HLA-ABC-APC

Laitinen Figure S2

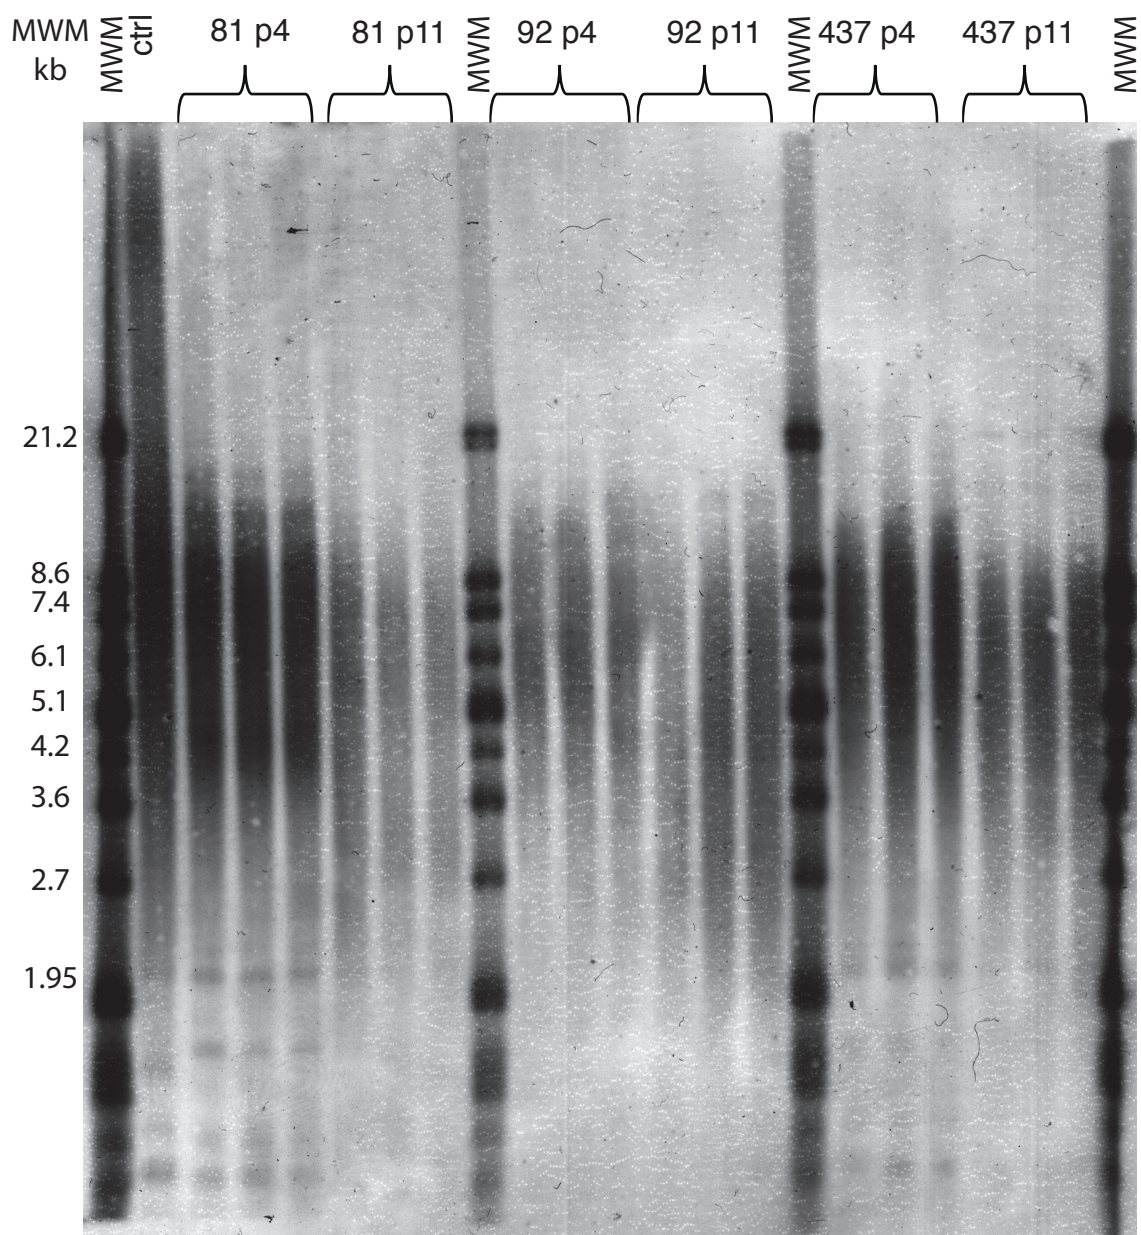

**Lysophosphatidylcholine (LysoPC)**

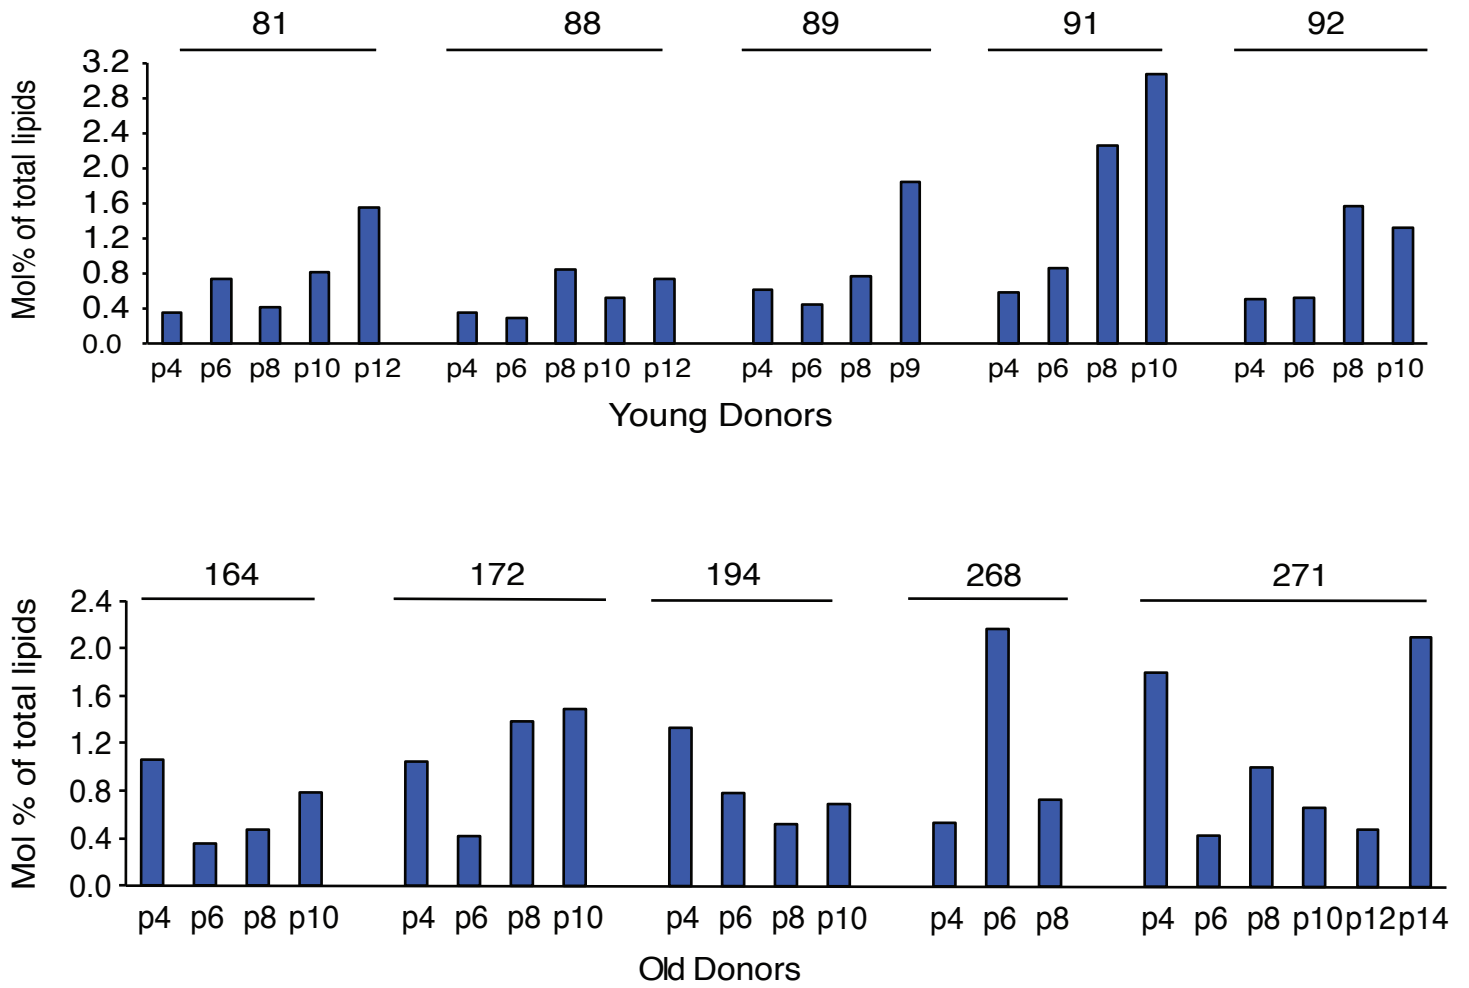

Laitinen Figure S4

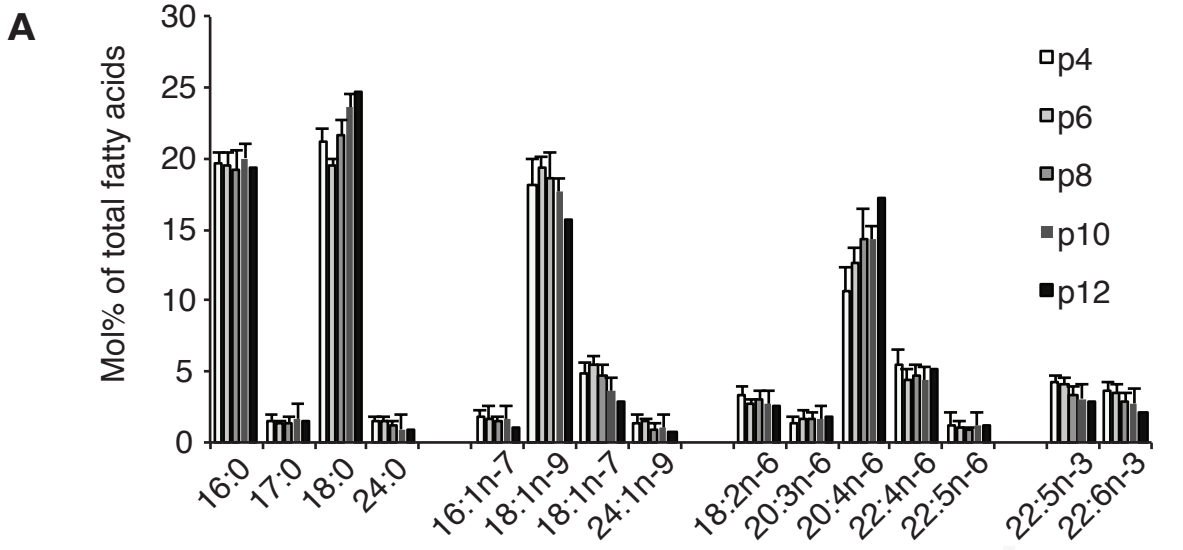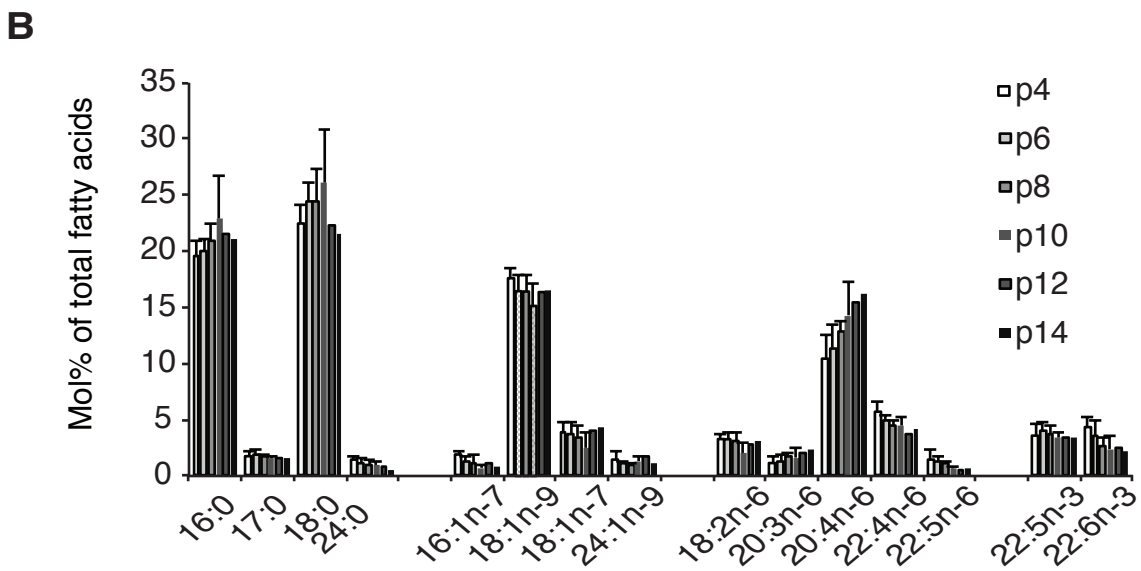

**Table S1.** Antibodies used in immunophenotype analysis. Abbreviations: FITC, fluorescein isothiocyanate; PE, R-phycoerythrin; APC, allophycocyanin

| <b>Antigen</b> | <b>Fluorochrome</b> | <b>Isotype class</b> | <b>Source</b>                                |
|----------------|---------------------|----------------------|----------------------------------------------|
| CD13           | APC                 | IgG1 $\kappa$        | Becton Dickinson (BD, San Jose, CA, USA)     |
| CD14           | PE                  | IgG2a $\kappa$       | BD                                           |
| CD19           | PE                  | IgG1 $\kappa$        | BD                                           |
| CD29           | APC                 | IgG1 $\kappa$        | BD                                           |
| CD34           | PE                  | IgG2a $\kappa$       | Miltenyi-Biotec (Bergisch Gladbach, Germany) |
| CD44           | FITC                | IgG2b $\kappa$       | BD                                           |
| CD45           | PE                  | IgG1 $\kappa$        | BD                                           |
| CD49e          | PE                  | IgG1 $\kappa$        | BD                                           |
| CD73           | PE                  | IgG1 $\kappa$        | BD                                           |
| CD105          | FITC                | IgG2a $\kappa$       | Abcam (Cambridge, UK)                        |
| CD106          | FITC                | IgG1 $\kappa$        | BD                                           |
| CD166          | PE                  | IgG1 $\kappa$        | BD                                           |
| CD271          | PE                  | IgG1 $\kappa$        | BD                                           |
| HLA-ABC        | APC                 | IgG1 $\kappa$        | BD                                           |
| HLA-DR         | FITC                | IgG2a $\kappa$       | BD                                           |

**Table S2.** Differentially expressed genes related to cell cycle, DNA replication and DNA packaging in old donors (o8-o4) and in young donors (y8-y4)

| <b>Description</b>                                                         | <b>HGNC symbol</b> | <b>Gene ID</b> | <b>logFC o8-o4</b> | <b>logFC y8-y4</b> |
|----------------------------------------------------------------------------|--------------------|----------------|--------------------|--------------------|
| <i>Cell cycle</i>                                                          |                    |                |                    |                    |
| cell division cycle 7 homolog ( <i>S. cerevisiae</i> )                     | CDC7               | 8317           | -1,050166332       | -0,77852524        |
| structural maintenance of chromosomes 4                                    | SMC4               | 10051          | -1,381994327       | -0,862654045       |
| geminin, DNA replication inhibitor                                         | GMNN               | 51053          | -0,98319783        | -0,706259586       |
| meiosis-specific nuclear structural 1                                      | MNS1               | 55329          | -0,60404867        | -0,577089566       |
| <i>DNA replication</i>                                                     |                    |                |                    |                    |
| replication factor C (activator 1) 4, 37kDa                                | RCF4               | 5984           | -1,05515218        | -0,730045794       |
| RMI1, RecQ mediated genome instability 1, homolog ( <i>S. cerevisiae</i> ) | RMI1               | 80010          | -0,724077548       | -0,658016878       |
| high-mobility group box 2                                                  | HMGB2              | 3148           | -1,443530416       | -0,992866666       |
| <i>DNA packaging</i>                                                       |                    |                |                    |                    |
| histone cluster 1, H1c                                                     | HIST1H1C           | 3006           | 1,566321608        | 1,559514346        |
| histone cluster 1, H2bb                                                    | HIST1H2BB          | 3018           | 0,767098144        | 0,621343412        |
| histone cluster 1, H2bc                                                    | HIST1H2BC          | 8347           | 1,010995135        | 0,716544147        |
| histone cluster 1, H2bd]                                                   | HIST1H2BD          | 3017           | 0,799076916        | 0,596075278        |
| histone cluster 1, H2bg                                                    | HIST1H2BG          | 8339           | 0,885130645        | 0,714649993        |
| histone cluster 1, H2bh                                                    | HIST1H2BH          | 8345           | 0,876980458        | 0,670824907        |
| histone cluster 1, H2bi                                                    | HIST1H2BI          | 8346           | 0,763839261        | 0,575273425        |
| histone cluster 1, H2bk                                                    | HIST1H2BK          | 85236          | 1,13349313         | 0,811198885        |
| histone cluster 1, H2bl                                                    | HIST1H2BL          | 8340           | 0,821055941        | 0,721918279        |
| histone cluster 1, H2bm                                                    | HIST1H2BM          | 8342           | 0,839795175        | 0,655667088        |
| histone cluster 1, H2bo                                                    | HIST1H2BO          | 8348           | 0,796644051        | 0,696613671        |
| histone cluster 2, H2aa4                                                   | HIST2H2AA4         | 723790         | 1,051616292        | 0,724300039        |

**Table S3 Differentially expressed genes o4-y4**

| <b>Gene Symbol</b> | <b>Gene ID</b> | <b>logFC</b> | <b>p-value</b> |
|--------------------|----------------|--------------|----------------|
| ATP1A3             | 478            | 5.843937716  | 6.93E-08       |
| FMO3               | 2328           | 4.65085585   | 0.000950293    |
| CD36               | 948            | 4.444790731  | 0.009646239    |
| NGEF               | 25791          | 3.97449324   | 5.05E-05       |
| COL13A1            | 1305           | 3.907506278  | 0.001650942    |
| IRX1               | 79192          | 3.818714009  | 3.26E-05       |
| GALNT6             | 11226          | 3.773176895  | 2.87E-05       |
| KRT34              | 3885           | 3.434711336  | 0.000292247    |
| EGFLAM             | 133584         | 3.421423467  | 0.000151402    |
| SERPINA9           | 327657         | 3.247502657  | 0.000201432    |
| RAB3B              | 5865           | 3.027723715  | 0.00083397     |
| KCNN4              | 3783           | 2.985630115  | 0.001404004    |
| CAMK2N1            | 55450          | 2.934913789  | 0.002127559    |
| NOV                | 4856           | 2.877698346  | 0.000784612    |
| TWIST2             | 117581         | 2.855883202  | 3.34E-05       |
| PTER               | 9317           | 2.845489497  | 1.31E-06       |
| FAM43A             | 131583         | 2.833828498  | 0.006000349    |
| CCNO               | 10309          | 2.82219656   | 0.008734535    |
| MARVELD2           | 153562         | 2.711024867  | 0.000198005    |
| RGS20              | 8601           | 2.598269473  | 0.000355791    |
| PAMR1              | 25891          | 2.594478719  | 0.001000333    |
| HOXA13             | 3209           | 2.510082674  | 0.000608131    |
| LOC100130938       | 100130938      | 2.471762448  | 6.67E-05       |
| ABI3BP             | 25890          | 2.460789022  | 0.000103576    |
| GBP3               | 2635           | 2.447750153  | 0.002340745    |
| PORCN              | 64840          | 2.403811642  | 6.59E-05       |
| MARCH4             | 57574          | 2.34964548   | 2.98E-05       |
| BARX1              | 56033          | 2.312031063  | 0.007160783    |
| SYT7               | 9066           | 2.310917106  | 0.005223975    |
| GRB14              | 2888           | 2.289712099  | 0.004121021    |
| FAM174B            | 400451         | 2.254966897  | 0.000385326    |
| EYA4               | 2070           | 2.233735241  | 0.00070453     |
| TMEM30B            | 161291         | 2.190376107  | 0.003971745    |
| RN5-8S1            | 100008587      | 2.150718712  | 0.006579456    |
| ADRA2C             | 152            | 2.127908488  | 0.003555595    |
| GSTT2              | 2953           | 2.119208344  | 0.007637639    |
| C11orf87           | 399947         | 2.092238455  | 0.002579185    |
| FLJ22447           | 400221         | 2.071291969  | 0.002253893    |
| COBLL1             | 22837          | 2.039082788  | 0.002011536    |
| PCOLCE2            | 26577          | 1.946844803  | 0.008085738    |
| KBTBD11            | 9920           | 1.928863909  | 0.00703936     |



|              |           |             |             |
|--------------|-----------|-------------|-------------|
| AFAP1L1      | 134265    | 1.91586146  | 0.001775718 |
| REEP4        | 80346     | 1.893593157 | 0.001016914 |
| NAAA         | 27163     | 1.887604335 | 0.003673204 |
| LINC00341    | 79686     | 1.852134793 | 0.000337672 |
| SLC39A7      | 7922      | 1.814903944 | 7.33E-06    |
| APBB1IP      | 54518     | 1.814588872 | 1.88E-05    |
| CDH18        | 1016      | 1.806972874 | 0.001749813 |
| E2F7         | 144455    | 1.793975821 | 0.000270512 |
| LOC284998    | 284998    | 1.781050554 | 0.002161332 |
| C15orf23     | 90417     | 1.764309046 | 0.001970249 |
| MOCOS        | 55034     | 1.760692515 | 0.008129694 |
| STXBP6       | 29091     | 1.726580352 | 0.000226044 |
| ERCC6        | 2074      | 1.726501043 | 0.004197306 |
| ZSWIM7       | 125150    | 1.695753123 | 0.003929242 |
| IL3RA        | 3563      | 1.684376118 | 0.002653174 |
| CALB2        | 794       | 1.680692007 | 0.000103136 |
| SLC12A6      | 9990      | 1.656696394 | 0.003227542 |
| CHCHD10      | 400916    | 1.639287245 | 0.000302909 |
| CTPS1        | 1503      | 1.602001032 | 0.004806935 |
| SLC7A5       | 8140      | 1.596228695 | 0.008489139 |
| COX7A1       | 1346      | 1.583197532 | 0.002262548 |
| CD59         | 966       | 1.576569475 | 0.001854681 |
| MFSD7        | 84179     | 1.545797361 | 0.009599763 |
| NCF2         | 4688      | 1.529160928 | 0.000258015 |
| CCIN         | 881       | 1.517728761 | 0.001280525 |
| TMEM65       | 157378    | 1.509201793 | 3.98E-05    |
| EDN1         | 1906      | 1.503964796 | 0.000242524 |
| TMEM171      | 134285    | 1.500171686 | 0.002252021 |
| MAFF         | 23764     | 1.470286891 | 0.000110229 |
| FLJ45684     | 400666    | 1.457379674 | 0.0012148   |
| NGF          | 4803      | 1.417972105 | 0.003514051 |
| NPAS2        | 4862      | 1.416203699 | 2.78E-05    |
| INCENP       | 3619      | 1.393523661 | 0.0085496   |
| LRP8         | 7804      | 1.374177096 | 0.002447909 |
| ABLIM3       | 22885     | 1.359186119 | 3.71E-05    |
| CCDC81       | 60494     | 1.337091008 | 0.00178355  |
| TMEM191A     | 84222     | 1.324806756 | 0.000221415 |
| LOC100507421 | 100507421 | 1.312345525 | 0.006944646 |
| CLDN14       | 23562     | 1.303764392 | 0.002871601 |
| LRRC8D       | 55144     | 1.289799411 | 0.006007342 |
| LINC00294    | 283267    | 1.285180668 | 0.000220437 |
| TMCO7        | 79613     | 1.281512634 | 0.000261369 |
| C15orf52     | 388115    | 1.27522483  | 0.008777434 |
| ZDHHC14      | 79683     | 1.274002281 | 0.009912024 |
| MFSD6        | 54842     | 1.26535299  | 0.009487817 |

|              |           |             |             |
|--------------|-----------|-------------|-------------|
| HINT3        | 135114    | 1.25818886  | 0.003196429 |
| EMP3         | 2014      | 1.255433148 | 0.001965526 |
| SLC22A23     | 63027     | 1.229470844 | 0.009779431 |
| CDK6         | 1021      | 1.221576536 | 0.005981086 |
| PPP1R14A     | 94274     | 1.219576951 | 0.008723018 |
| NIPAL3       | 57185     | 1.21944789  | 0.000797469 |
| OSR1         | 130497    | 1.215045948 | 0.000629878 |
| TIAM1        | 7074      | 1.209717832 | 0.000265275 |
| ATP2B4       | 493       | 1.201013069 | 0.000498045 |
| MGLL         | 11343     | 1.200607789 | 0.001007136 |
| RRAS2        | 22800     | 1.191618781 | 0.001582765 |
| FTSJ1        | 24140     | 1.185684518 | 0.000450064 |
| ATP7B        | 540       | 1.182090759 | 0.008327283 |
| TCP11L1      | 55346     | 1.175278315 | 0.004955901 |
| PYROXD1      | 79912     | 1.1677614   | 0.007723044 |
| PINK1        | 65018     | 1.164698498 | 0.000573746 |
| AFAP1        | 60312     | 1.160263892 | 0.009522546 |
| SYTL3        | 94120     | 1.155770863 | 0.001322466 |
| LYSMD4       | 145748    | 1.140633801 | 0.003388825 |
| LOX          | 4015      | 1.129540888 | 0.002736021 |
| NDRG1        | 10397     | 1.120465747 | 0.003758158 |
| ADCY9        | 115       | 1.106596091 | 0.00791175  |
| STYK1        | 55359     | 1.105376191 | 0.001068828 |
| MAD1L1       | 8379      | 1.104753891 | 0.008587846 |
| CD4          | 920       | 1.096644599 | 0.00015167  |
| PLEK2        | 26499     | 1.089802243 | 0.003286628 |
| KCNC4        | 3749      | 1.081344871 | 0.000986384 |
| METRNL       | 284207    | 1.078091225 | 0.009652356 |
| AHSA2        | 130872    | 1.070322424 | 0.001067408 |
| LOC100128737 | 100128737 | 1.066933515 | 0.000381991 |
| LENG9        | 94059     | 1.060294901 | 0.00159677  |
| TUBA3D       | 113457    | 1.056800622 | 0.005819519 |
| ASAP2        | 8853      | 1.049941314 | 0.00291403  |
| CD44         | 960       | 1.046422887 | 0.002458585 |
| SYNGR4       | 23546     | 1.046400909 | 0.00406272  |
| STBD1        | 8987      | 1.04489003  | 0.00425349  |
| ASCL5        | 647219    | 1.037635731 | 0.006386537 |
| ETV5         | 2119      | 1.037158139 | 0.005706976 |
| CD163L1      | 283316    | 1.027302034 | 0.000667832 |
| SLC12A2      | 6558      | 1.027206251 | 0.00108782  |
| DSP          | 1832      | 1.026880924 | 0.004362291 |
| FAM50B       | 26240     | 1.024413697 | 0.00043957  |
| FLJ46066     | 401103    | 0.994857149 | 0.001100674 |
| RGS19        | 10287     | 0.993687729 | 0.00547341  |
| CLCN5        | 1184      | 0.988124661 | 0.008000219 |

|              |           |             |             |
|--------------|-----------|-------------|-------------|
| C3AR1        | 719       | 0.985789454 | 0.007353018 |
| DUSP1        | 1843      | 0.985493059 | 0.002690617 |
| SGTB         | 54557     | 0.985250941 | 0.001683042 |
| MAP3K6       | 9064      | 0.983864395 | 0.000136901 |
| CCT3         | 7203      | 0.982276176 | 0.00972584  |
| KATNAL1      | 84056     | 0.979356766 | 0.001917085 |
| BVES         | 11149     | 0.975829774 | 0.001436951 |
| TERC         | 7012      | 0.965437381 | 0.000483157 |
| CLSTN2       | 64084     | 0.958957537 | 0.00675423  |
| PBX3         | 5090      | 0.955919252 | 0.00025579  |
| GCOM1        | 145781    | 0.950914567 | 0.00343115  |
| SLCO2A1      | 6578      | 0.948997126 | 0.001170067 |
| PPP1R3D      | 5509      | 0.948024491 | 0.006745713 |
| SMAGP        | 57228     | 0.943090708 | 0.003600624 |
| ADPRH        | 141       | 0.942968699 | 0.00306738  |
| PRKCA        | 5578      | 0.94036901  | 0.002783349 |
| PYCR2        | 29920     | 0.935964093 | 4.03E-05    |
| LOC284242    | 284242    | 0.927872425 | 0.004192354 |
| SLC2A14      | 144195    | 0.922880619 | 0.009718805 |
| NDFIP2       | 54602     | 0.919648846 | 0.006668289 |
| PROSAP1P1    | 9762      | 0.919402362 | 0.000325212 |
| ZDHHC8       | 29801     | 0.916387413 | 0.001404335 |
| KCNJ14       | 3770      | 0.912949607 | 0.005612952 |
| CNTD1        | 124817    | 0.898162468 | 0.00020519  |
| RABAC1       | 10567     | 0.894044964 | 2.76E-05    |
| AZU1         | 566       | 0.892563478 | 0.001504715 |
| IAPP         | 3375      | 0.888461373 | 0.003163678 |
| SPATA5       | 166378    | 0.88310192  | 0.00029185  |
| AP1S1        | 1174      | 0.878512521 | 3.28E-05    |
| LOC100133286 | 100133286 | 0.877545561 | 0.001727397 |
| FBXL19       | 54620     | 0.876532965 | 0.008891382 |
| PARD6G       | 84552     | 0.86666124  | 0.006398161 |
| GPN3         | 51184     | 0.864512595 | 2.17E-05    |
| OR10H4       | 126541    | 0.862378506 | 0.005074688 |
| GFOD1        | 54438     | 0.860204546 | 0.008754561 |
| DNMBP        | 23268     | 0.858371202 | 0.007442821 |
| GFPT1        | 2673      | 0.855937536 | 0.00863888  |
| MAP3K10      | 4294      | 0.851904556 | 0.002202475 |
| KRT42P       | 284116    | 0.848725962 | 0.002578266 |
| KCTD7        | 154881    | 0.845626482 | 0.002330176 |
| POLR3G       | 10622     | 0.829934985 | 0.000558557 |
| NTM          | 50863     | 0.828463394 | 0.002328378 |
| MOP-1        | 643616    | 0.821274152 | 0.002574126 |
| GLYATL1      | 92292     | 0.81925627  | 0.00426594  |
| FAM59B       | 150946    | 0.813114998 | 0.00445548  |

|              |           |             |             |
|--------------|-----------|-------------|-------------|
| POLR2A       | 5430      | 0.810595634 | 0.000650279 |
| BAX          | 581       | 0.809804665 | 0.001039809 |
| HTRA2        | 27429     | 0.807450453 | 0.000690879 |
| FLJ25694     | 100128202 | 0.797876922 | 0.000761409 |
| PIEZO1       | 9780      | 0.79474337  | 0.00503364  |
| OR11A1       | 26531     | 0.794076481 | 0.008526796 |
| TOMM20L      | 387990    | 0.792499688 | 0.005940121 |
| NYX          | 60506     | 0.790574646 | 0.000761402 |
| CAMK2N2      | 94032     | 0.787661981 | 0.006950052 |
| SYNE1        | 23345     | 0.785330689 | 0.003514997 |
| LOC100289143 | 100289143 | 0.784437742 | 0.000240591 |
| CPEB4        | 80315     | 0.782300167 | 0.009475125 |
| HMX3         | 340784    | 0.77759008  | 0.003066288 |
| CLTB         | 1212      | 0.775881156 | 6.42E-05    |
| TMEM48       | 55706     | 0.775448433 | 0.005738235 |
| ANKRD28      | 23243     | 0.774070151 | 0.007888079 |
| TAL1         | 6886      | 0.772361146 | 0.002525857 |
| PKD1         | 5310      | 0.771895061 | 0.003724418 |
| KRTAP4-11    | 653240    | 0.76735162  | 0.001000933 |
| ABHD15       | 116236    | 0.764822587 | 0.004894648 |
| OCRL         | 4952      | 0.76275214  | 0.0081469   |
| MGAT5        | 4249      | 0.759545405 | 0.007829115 |
| CRY1         | 1407      | 0.758286822 | 0.000611774 |
| GNAZ         | 2781      | 0.757621928 | 0.004774456 |
| FANCM        | 57697     | 0.755914208 | 0.00654609  |
| LOC100128191 | 100128191 | 0.751401358 | 0.002238798 |
| MAP3K3       | 4215      | 0.750235872 | 0.001883645 |
| LOC100131599 | 100131599 | 0.748484494 | 0.005663484 |
| FAM19A5      | 25817     | 0.748252521 | 0.001499074 |
| SLC25A19     | 60386     | 0.748225879 | 2.14E-05    |
| SLC16A8      | 23539     | 0.746634826 | 0.001828622 |
| GTPBP4       | 23560     | 0.739464507 | 0.009267838 |
| ITPRIPL2     | 162073    | 0.738246508 | 0.003006174 |
| DNAJC5       | 80331     | 0.735126887 | 0.002571191 |
| ATP10A       | 57194     | 0.732563833 | 0.003535488 |
| C1orf200     | 644997    | 0.728983031 | 0.005967335 |
| FITM2        | 128486    | 0.727410224 | 0.008758957 |
| TBX1         | 6899      | 0.725760152 | 0.004204618 |
| C22orf29     | 79680     | 0.725058892 | 0.005573881 |
| SFI1         | 9814      | 0.723779213 | 0.006362887 |
| WRN          | 7486      | 0.718837223 | 0.00068279  |
| PPT2         | 9374      | 0.717666146 | 0.002426802 |
| NCAPD3       | 23310     | 0.71072719  | 0.007184074 |
| KIAA0284     | 283638    | 0.71034175  | 0.003663928 |
| EMILIN3      | 90187     | 0.709393102 | 0.000592806 |

|           |        |             |             |
|-----------|--------|-------------|-------------|
| DOCK3     | 1795   | 0.709000739 | 0.000708977 |
| RRP15     | 51018  | 0.708013854 | 0.003426336 |
| TOX       | 9760   | 0.707728171 | 0.001357572 |
| VASN      | 114990 | 0.70456126  | 0.009923681 |
| MMS22L    | 253714 | 0.702300904 | 0.003391173 |
| TAF15     | 8148   | 0.702180437 | 0.001361206 |
| HYAL3     | 8372   | 0.692572332 | 0.009935371 |
| UCK2      | 7371   | 0.689840026 | 0.001465848 |
| PHOSPHO1  | 162466 | 0.68832603  | 0.007161783 |
| RAP1GDS1  | 5910   | 0.687947708 | 0.000312756 |
| SFMBT1    | 51460  | 0.684795312 | 0.001800858 |
| TYROBP    | 7305   | 0.683755813 | 0.000190881 |
| ABCC1     | 4363   | 0.682207322 | 0.009908584 |
| LARP6     | 55323  | 0.680984896 | 0.004084723 |
| POU3F1    | 5453   | 0.678046725 | 0.002782344 |
| NUP205    | 23165  | 0.670688682 | 0.004932121 |
| FAM214B   | 80256  | 0.669855253 | 0.005075368 |
| MAS1L     | 116511 | 0.666579501 | 0.003013736 |
| TARSL2    | 123283 | 0.664318796 | 0.000607058 |
| PRG4      | 10216  | 0.661377762 | 0.000303021 |
| RBMX2EP   | 159125 | 0.661063556 | 0.004485554 |
| GSK3A     | 2931   | 0.660219717 | 0.001823166 |
| SPIRE1    | 56907  | 0.655718745 | 0.005468483 |
| SERPINA6  | 866    | 0.654923097 | 0.00507507  |
| CCDC96    | 257236 | 0.653567866 | 0.002435983 |
| PLCD1     | 5333   | 0.652928202 | 0.000335521 |
| DDA1      | 79016  | 0.651821237 | 0.003664563 |
| ERGIC1    | 57222  | 0.651697581 | 0.004761205 |
| PHKG1     | 5260   | 0.650114149 | 0.008337758 |
| LOC340508 | 340508 | 0.649217639 | 0.004891001 |
| DVL1      | 1855   | 0.648749831 | 0.008171628 |
| MYBBP1A   | 10514  | 0.648617094 | 0.00676404  |
| RTN3      | 10313  | 0.647781392 | 0.00068834  |
| NSUN6     | 221078 | 0.646823764 | 0.00420176  |
| ITPKA     | 3706   | 0.63909297  | 0.003639158 |
| SMARCAL1  | 50485  | 0.638806374 | 0.005456788 |
| SHANK3    | 85358  | 0.638711225 | 0.007677551 |
| FBXL18    | 80028  | 0.636820039 | 0.001355313 |
| EBNA1BP2  | 10969  | 0.63632372  | 0.00073162  |
| NDST2     | 8509   | 0.635588987 | 0.003591964 |
| KIAA1715  | 80856  | 0.634948235 | 0.009075118 |
| SCRN1     | 9805   | 0.634046877 | 0.002789776 |
| CDC42BPB  | 9578   | 0.629120656 | 0.006146381 |
| PCMT1     | 5110   | 0.62866627  | 0.002572748 |
| ARRDC1    | 92714  | 0.625360091 | 0.005365768 |

|           |           |             |             |
|-----------|-----------|-------------|-------------|
| GGT1      | 2678      | 0.624831513 | 9.44E-05    |
| APLP1     | 333       | 0.624053957 | 0.002273336 |
| SLX4      | 84464     | 0.620195919 | 0.00171452  |
| HRAS      | 3265      | 0.618341271 | 4.98E-05    |
| C1orf140  | 400804    | 0.615130973 | 0.006747593 |
| DEPDC5    | 9681      | 0.614822875 | 0.003754343 |
| HIST1H2BN | 8341      | 0.614605542 | 0.00198038  |
| JUN       | 3725      | 0.613899594 | 0.00316845  |
| FAM115C   | 285966    | 0.612147872 | 0.006959587 |
| ZNF474    | 133923    | 0.611123102 | 0.0075293   |
| ADAMTS19  | 171019    | 0.610200794 | 0.002671373 |
| SPTLC2    | 9517      | 0.609811883 | 0.007188956 |
| MGC2752   | 65996     | 0.606963667 | 0.006487666 |
| TUBGCP2   | 10844     | 0.605723089 | 0.006513732 |
| ZAK       | 51776     | 0.60283442  | 0.0041148   |
| TMEM191B  | 728229    | 0.602124076 | 0.000548347 |
| DLST      | 1743      | 0.601233695 | 0.008886989 |
| ST14      | 6768      | 0.600720526 | 0.004589544 |
| ZHX3      | 23051     | 0.600453718 | 0.001315736 |
| ANO10     | 55129     | 0.598459767 | 0.005688085 |
| SPRN      | 503542    | 0.597650388 | 0.006062958 |
| -         | 100288549 | 0.597450095 | 0.000761934 |
| SPTAN1    | 6709      | 0.596026181 | 0.009340006 |
| OR8B8     | 26493     | 0.594230661 | 0.005725226 |
| SNPH      | 9751      | 0.594198061 | 0.000859899 |
| RNASE13   | 440163    | 0.59400607  | 0.008310456 |
| LINGO4    | 339398    | 0.592992759 | 0.002299872 |
| C21orf58  | 54058     | 0.590827706 | 0.006826534 |
| LOC440525 | 440525    | 0.589610421 | 0.003183649 |
| RAB21     | 23011     | 0.589206961 | 0.000313308 |
| ANK2      | 287       | 0.588984236 | 0.007663658 |
| KLC2      | 64837     | 0.587540491 | 0.000330485 |
| CDYL2     | 124359    | 0.583288304 | 0.009470716 |
| RASA3     | 22821     | 0.580048603 | 0.0099215   |
| ESD       | 2098      | -0.58139295 | 0.000874973 |
| ZNF286B   | 729288    | -0.58162173 | 0.004566006 |
| ZNF812    | 729648    | -0.58801905 | 0.00235297  |
| LOC401397 | 401397    | -0.58946068 | 0.004006899 |
| SMARCE1   | 6605      | -0.59037136 | 0.001082047 |
| MIER1     | 57708     | -0.59733313 | 0.001357594 |
| ZNF280C   | 55609     | -0.59942406 | 0.003146996 |
| IGBP1     | 3476      | -0.60017144 | 0.00011372  |
| CD99      | 4267      | -0.60027352 | 0.000791856 |
| RPL15     | 6138      | -0.60045468 | 0.0064755   |
| RBBP4     | 5928      | -0.60165727 | 0.001588872 |

|              |           |             |             |
|--------------|-----------|-------------|-------------|
| SERTAD2      | 9792      | -0.60181964 | 0.009045543 |
| ZNF417       | 147687    | -0.60381207 | 0.002535079 |
| HERC6        | 55008     | -0.60782005 | 0.000109514 |
| TCEAL8       | 90843     | -0.60946514 | 0.003146219 |
| OR4F29       | 729759    | -0.6114134  | 0.000520677 |
| SHC1         | 6464      | -0.61154036 | 0.00226663  |
| ZBTB25       | 7597      | -0.61262946 | 0.001933864 |
| BMF          | 90427     | -0.61595491 | 0.009286197 |
| GTF2H5       | 404672    | -0.61670574 | 0.005310627 |
| STAT3        | 6774      | -0.61756399 | 0.005068204 |
| SSR2         | 6746      | -0.61817272 | 0.009593582 |
| GBAS         | 2631      | -0.61937596 | 0.008477203 |
| SARM1        | 23098     | -0.62182313 | 0.002323799 |
| RASSF4       | 83937     | -0.62788906 | 3.97E-05    |
| SEPT7P2      | 641977    | -0.6281423  | 0.004833442 |
| TRIM5        | 85363     | -0.63111184 | 0.000443982 |
| MAP3K12      | 7786      | -0.63226297 | 0.004116446 |
| FAM13C       | 220965    | -0.63634759 | 0.004160291 |
| SDR39U1      | 56948     | -0.63697148 | 0.002597525 |
| DUSP10       | 11221     | -0.63764787 | 0.000650773 |
| MYOZ3        | 91977     | -0.6387182  | 0.000891924 |
| POU5F1       | 5460      | -0.64052653 | 0.009198246 |
| SOCS1        | 8651      | -0.64128106 | 0.002200681 |
| SCMH1        | 22955     | -0.6418867  | 0.007291998 |
| COA5         | 493753    | -0.64373578 | 0.009547622 |
| GABARAP      | 11337     | -0.64670221 | 0.003692612 |
| ZNF300       | 91975     | -0.64816536 | 0.000329374 |
| CROCC        | 9696      | -0.64930223 | 0.002611195 |
| FHL1         | 2273      | -0.64955305 | 0.003783878 |
| LOC100240734 | 100240734 | -0.64973158 | 0.004236802 |
| DLEU2L       | 79469     | -0.65377048 | 0.007981604 |
| DTX3L        | 151636    | -0.65571918 | 0.009462876 |
| BZRAP1       | 9256      | -0.65597101 | 0.002943798 |
| MPHOSPH10    | 10199     | -0.65964161 | 0.001379333 |
| NARS2        | 79731     | -0.66085647 | 0.000427472 |
| -            | 100130966 | -0.66269389 | 0.003358516 |
| TMEM39A      | 55254     | -0.66511783 | 0.006676263 |
| ZNF323       | 64288     | -0.66531062 | 0.0015639   |
| SNTG2        | 54221     | -0.66640371 | 0.000354904 |
| PRKCI        | 5584      | -0.66750478 | 0.009099157 |
| C14orf43     | 91748     | -0.6676367  | 0.00610657  |
| SF1          | 7536      | -0.67448513 | 0.005165111 |
| LOC100240735 | 100240735 | -0.67490259 | 0.006246293 |
| RBM4B        | 83759     | -0.67714559 | 0.00084608  |
| LOC142937    | 142937    | -0.67722608 | 0.002143672 |

|           |           |             |             |
|-----------|-----------|-------------|-------------|
| RRAGB     | 10325     | -0.68762947 | 0.005835086 |
| CD74      | 972       | -0.68843653 | 0.001314502 |
| PP12613   | 100192379 | -0.68932485 | 0.001737561 |
| RNASEH2C  | 84153     | -0.69161045 | 0.005145533 |
| PFN2      | 5217      | -0.69313135 | 0.000952382 |
| UBXN4     | 23190     | -0.69615372 | 0.000192473 |
| ATAT1     | 79969     | -0.69632369 | 0.000101021 |
| TMEM133   | 83935     | -0.70186308 | 0.000269511 |
| CCNG1     | 900       | -0.70211619 | 0.009390265 |
| ZBTB1     | 22890     | -0.70397905 | 0.002259877 |
| VHL       | 7428      | -0.70506486 | 0.00961722  |
| CLK2      | 1196      | -0.70539396 | 0.000621427 |
| FAM63B    | 54629     | -0.70561241 | 0.001232777 |
| POM121L9P | 29774     | -0.7090069  | 0.00424095  |
| EFNA4     | 1945      | -0.70931326 | 0.001264539 |
| C14orf159 | 80017     | -0.71122813 | 0.002595055 |
| MPLKIP    | 136647    | -0.71132761 | 0.007688009 |
| POU5F2    | 134187    | -0.7130808  | 4.66E-05    |
| NICN1     | 84276     | -0.71321609 | 0.00695154  |
| -         | 100510356 | -0.71636074 | 0.004102617 |
| MTHFS     | 10588     | -0.71855054 | 0.000955784 |
| ZNF334    | 55713     | -0.72099244 | 0.000756425 |
| H3F3A     | 3020      | -0.72381664 | 0.002070349 |
| RNASET2   | 8635      | -0.72786368 | 0.000223273 |
| HIST1H3A  | 8350      | -0.73031788 | 0.002590566 |
| PTBP2     | 58155     | -0.73127102 | 0.001790847 |
| LTBP3     | 4054      | -0.73214095 | 0.003957501 |
| NSA2      | 10412     | -0.7329937  | 0.001114049 |
| PER1      | 5187      | -0.73590589 | 0.00037731  |
| CCNI      | 10983     | -0.73701257 | 0.002995666 |
| LPCAT3    | 10162     | -0.73743269 | 0.003619047 |
| PCCA      | 5095      | -0.73785761 | 0.008213216 |
| PKIB      | 5570      | -0.7401592  | 0.000908083 |
| RNF114    | 55905     | -0.7412537  | 0.000861012 |
| BCL6      | 604       | -0.74334607 | 0.001117251 |
| DNMT3A    | 1788      | -0.74679985 | 0.0011845   |
| LOC641746 | 641746    | -0.74872293 | 0.000563502 |
| WISP1     | 8840      | -0.75122667 | 0.000387906 |
| GNPDA1    | 10007     | -0.7536383  | 0.000696236 |
| ZCCHC24   | 219654    | -0.76145388 | 0.008491957 |
| TRIM22    | 10346     | -0.76397571 | 0.009770883 |
| MCU       | 90550     | -0.76510928 | 0.008565544 |
| DNAH11    | 8701      | -0.77019054 | 0.009298548 |
| ETNK2     | 55224     | -0.77164047 | 0.003217638 |
| SRP9      | 6726      | -0.77565626 | 0.003241443 |



|              |           |             |             |
|--------------|-----------|-------------|-------------|
| GCLM         | 2730      | -0.77804896 | 0.009818797 |
| NLGN2        | 57555     | -0.78195318 | 0.002017856 |
| ABI2         | 10152     | -0.78457595 | 0.003234995 |
| EXT1         | 2131      | -0.78590099 | 0.001190153 |
| PARP9        | 83666     | -0.78659591 | 0.000896811 |
| SH2B1        | 25970     | -0.78830911 | 0.005103154 |
| ARL2         | 402       | -0.79182132 | 0.001879607 |
| CCDC102B     | 79839     | -0.79202461 | 0.000267104 |
| EPB41L1      | 2036      | -0.79268074 | 0.003819119 |
| EIF3L        | 51386     | -0.79397325 | 0.002044796 |
| ECH1         | 1891      | -0.7950003  | 0.001398588 |
| TRGV7        | 6981      | -0.79515562 | 0.000440707 |
| ZP1          | 22917     | -0.79538624 | 0.000229192 |
| TMEM200B     | 399474    | -0.8006403  | 0.003089955 |
| LOC100126784 | 100126784 | -0.80169715 | 0.000266254 |
| SRSF6        | 6431      | -0.80218927 | 0.006144654 |
| IRF2BP2      | 359948    | -0.80418105 | 0.002203909 |
| B3GALNT1     | 8706      | -0.80595061 | 0.002643886 |
| PLIN4        | 729359    | -0.80620909 | 0.004136529 |
| PGD          | 5226      | -0.81372907 | 0.00555388  |
| VGLL4        | 9686      | -0.81467844 | 0.005209212 |
| ZNF627       | 199692    | -0.81668111 | 0.006592867 |
| HIST1H4J     | 8363      | -0.81766992 | 0.00021433  |
| MECOM        | 2122      | -0.81827497 | 0.005471923 |
| IRF7         | 3665      | -0.81878827 | 0.002634346 |
| MRPS25       | 64432     | -0.81894017 | 0.009751386 |
| ACSF2        | 80221     | -0.81908823 | 0.005139048 |
| PLXNA4       | 91584     | -0.81943146 | 0.000901248 |
| CCNG2        | 901       | -0.82183669 | 0.009400456 |
| LRRC37A2     | 474170    | -0.82251943 | 0.002273946 |
| C2orf28      | 51374     | -0.82472144 | 0.000838053 |
| CASP6        | 839       | -0.82582576 | 0.005016329 |
| CD164        | 8763      | -0.83171553 | 8.49E-06    |
| PHYH         | 5264      | -0.83185096 | 0.00257391  |
| -            | 55525     | -0.83480078 | 0.008725002 |
| ATP8B4       | 79895     | -0.83755905 | 0.001041096 |
| LMAN2L       | 81562     | -0.84130961 | 0.0001527   |
| CLK1         | 1195      | -0.84420611 | 0.007179823 |
| FLJ90757     | 440465    | -0.8461202  | 0.007560958 |
| CCDC23       | 374969    | -0.84669929 | 0.008980745 |
| EIF2A        | 83939     | -0.85049727 | 0.008126562 |
| LAT2         | 7462      | -0.85225544 | 0.004763956 |
| STK17B       | 9262      | -0.85321221 | 0.004256262 |
| RDM1         | 201299    | -0.85389875 | 0.000203258 |
| IFNAR2       | 3455      | -0.85423557 | 0.007627953 |

|              |           |             |             |
|--------------|-----------|-------------|-------------|
| LOC100133050 | 100133050 | -0.85512658 | 0.002003027 |
| PLSCR1       | 5359      | -0.85954251 | 0.008478388 |
| ZSWIM4       | 65249     | -0.86256572 | 0.00160815  |
| MED4         | 29079     | -0.86277161 | 0.003495727 |
| ZNF561       | 93134     | -0.86442669 | 0.0013339   |
| SPG21        | 51324     | -0.87217249 | 0.00091747  |
| HIST1H4K     | 8362      | -0.87475154 | 0.003583476 |
| MCEE         | 84693     | -0.87553964 | 0.006686572 |
| HOXB7        | 3217      | -0.87593065 | 1.08E-06    |
| GSTA4        | 2941      | -0.88374943 | 0.002364924 |
| SLC43A1      | 8501      | -0.88644677 | 0.005395706 |
| MYL6B        | 140465    | -0.89106968 | 0.004722051 |
| MMD          | 23531     | -0.89184873 | 0.003931447 |
| EVL          | 51466     | -0.89270448 | 0.006960628 |
| NFYB         | 4801      | -0.89296483 | 0.004398345 |
| HEXB         | 3074      | -0.89366478 | 0.001550536 |
| ATP11B       | 23200     | -0.89421097 | 0.001197964 |
| FAM118A      | 55007     | -0.89711025 | 0.004902781 |
| HNMT         | 3176      | -0.90074538 | 0.005043631 |
| NUCB2        | 4925      | -0.90408079 | 0.000242846 |
| ARHGEF19     | 128272    | -0.90742179 | 7.11E-05    |
| EFNB3        | 1949      | -0.90971224 | 0.000514224 |
| DLK2         | 65989     | -0.91010874 | 0.001872275 |
| NAT14        | 57106     | -0.91484001 | 0.00799707  |
| FZD2         | 2535      | -0.92531718 | 0.005721034 |
| MKRN3        | 7681      | -0.93027685 | 0.008794353 |
| ST5          | 6764      | -0.93144959 | 0.000223953 |
| FRMD7        | 90167     | -0.93187258 | 0.000500212 |
| PPP2R3B-AS1  | 283981    | -0.93499008 | 0.007539146 |
| ZNF462       | 58499     | -0.93585973 | 0.006064535 |
| ZNF22        | 7570      | -0.93838418 | 1.70E-05    |
| FOXL1        | 2300      | -0.94110339 | 0.000308806 |
| EPSTI1       | 94240     | -0.94749357 | 0.000228834 |
| ZNF512       | 84450     | -0.94789835 | 1.55E-05    |
| WDYHV1       | 55093     | -0.9537301  | 0.004080555 |
| KRT8         | 3856      | -0.95882398 | 0.00424147  |
| KDM1A        | 23028     | -0.96318716 | 0.00715351  |
| LOC100192378 | 100192378 | -0.96377048 | 0.008205298 |
| SRSF5        | 6430      | -0.96871248 | 0.004391307 |
| RUNX2        | 860       | -0.96930293 | 0.000192526 |
| ELOVL3       | 83401     | -0.96999108 | 0.008840604 |
| CD320        | 51293     | -0.97107928 | 0.006232038 |
| RGMA         | 56963     | -0.97257286 | 0.000810215 |
| ZFHX4        | 79776     | -0.97563464 | 0.001223284 |
| IFNGR2       | 3460      | -0.97745594 | 0.001175539 |

|              |           |             |             |
|--------------|-----------|-------------|-------------|
| PDP2         | 57546     | -0.98245741 | 0.000965136 |
| IRX5         | 10265     | -0.98747457 | 0.002267402 |
| SREBF2       | 6721      | -0.98946701 | 0.003861689 |
| RNASE4       | 6038      | -0.99132503 | 0.002982042 |
| DAAM2        | 23500     | -0.99200587 | 0.001424588 |
| GLI3         | 2737      | -0.99645312 | 0.005725647 |
| LOC100131829 | 100131829 | -0.99832191 | 0.008230979 |
| SLC16A5      | 9121      | -1.00057423 | 0.001631647 |
| ZRANB2       | 9406      | -1.00592505 | 0.004692937 |
| KLF10        | 7071      | -1.00930734 | 0.002497261 |
| CLCA4        | 22802     | -1.01404594 | 2.46E-06    |
| ACOT1        | 641371    | -1.01549573 | 0.000533109 |
| ANKRD10      | 55608     | -1.02245962 | 0.001434398 |
| SOCS3        | 9021      | -1.02900174 | 0.006968406 |
| HCG22        | 285834    | -1.03642838 | 0.001629995 |
| CIRBP        | 1153      | -1.03892325 | 0.006667245 |
| TRANK1       | 9881      | -1.04035423 | 0.005718745 |
| AIG1         | 51390     | -1.04062692 | 6.84E-06    |
| HOXA6        | 3203      | -1.04721687 | 0.001631307 |
| GLTSCR2      | 29997     | -1.0699097  | 0.001352643 |
| SAT2         | 112483    | -1.07170481 | 0.000238171 |
| LOC100506191 | 100506191 | -1.07334271 | 0.004280838 |
| LACTB2       | 51110     | -1.07588863 | 0.0098384   |
| CEP70        | 80321     | -1.07858852 | 0.000878687 |
| G6PD         | 2539      | -1.0869083  | 0.002198229 |
| HMGN1        | 3150      | -1.089208   | 0.001367525 |
| EIF4B        | 1975      | -1.08983613 | 9.90E-05    |
| SALL4        | 57167     | -1.09571089 | 0.00660811  |
| H2BFM        | 286436    | -1.10066077 | 0.000143029 |
| KCNE3        | 10008     | -1.10067719 | 0.004103713 |
| CXCL16       | 58191     | -1.10729194 | 0.000883231 |
| LOC645166    | 645166    | -1.10872238 | 0.002663621 |
| STOM         | 2040      | -1.11130707 | 0.008282561 |
| AGPAT4-IT1   | 79992     | -1.11895397 | 0.003338394 |
| CCDC152      | 100129792 | -1.12228    | 0.000519138 |
| BIVM         | 54841     | -1.12245788 | 0.002029738 |
| MMAB         | 326625    | -1.12319873 | 0.000129684 |
| LYPD6        | 130574    | -1.12510647 | 0.001874653 |
| LOC388796    | 388796    | -1.12631225 | 0.008477646 |
| FIGNL2       | 401720    | -1.12681099 | 0.003473339 |
| ID3          | 3399      | -1.1272233  | 0.004626588 |
| IL1R1        | 3554      | -1.12756396 | 0.004123972 |
| PON3         | 5446      | -1.12869738 | 0.002976761 |
| C1QTNF6      | 114904    | -1.12919153 | 0.003556799 |
| DUSP2        | 1844      | -1.13265584 | 0.000143265 |

|              |           |             |             |
|--------------|-----------|-------------|-------------|
| SOX9         | 6662      | -1.13501656 | 0.005578633 |
| IRF9         | 10379     | -1.13598929 | 0.000413756 |
| FKBP7        | 51661     | -1.1374893  | 0.000208092 |
| UBA7         | 7318      | -1.13777903 | 0.008650642 |
| IL11RA       | 3590      | -1.13931206 | 3.00E-06    |
| OASL         | 8638      | -1.14026844 | 0.004296257 |
| ATF7IP2      | 80063     | -1.14307043 | 0.000976688 |
| HOXA5        | 3202      | -1.15529238 | 0.004799331 |
| MAFB         | 9935      | -1.15740061 | 0.001688355 |
| CDK14        | 5218      | -1.17002488 | 0.001595989 |
| SLC16A4      | 9122      | -1.17343782 | 0.00608257  |
| MAP2K6       | 5608      | -1.17546303 | 3.43E-05    |
| THBS3        | 7059      | -1.19624035 | 0.003630524 |
| TMEM25       | 84866     | -1.20059087 | 6.55E-05    |
| OLFML3       | 56944     | -1.20165161 | 0.001924458 |
| ASB2         | 51676     | -1.20915214 | 0.000202715 |
| HOXB3        | 3213      | -1.21037084 | 4.03E-08    |
| TMEM121      | 80757     | -1.21180644 | 0.005726706 |
| FPR1         | 2357      | -1.21705822 | 0.003273461 |
| DTWD1        | 56986     | -1.21758392 | 0.000545453 |
| LOC100130876 | 100130876 | -1.21778853 | 0.005800384 |
| PARP14       | 54625     | -1.21887854 | 0.005835325 |
| CHKB         | 1120      | -1.22485241 | 0.007685608 |
| LRIG3        | 121227    | -1.22534331 | 0.002584162 |
| STGC3        | 474171    | -1.23449686 | 0.009347992 |
| CA11         | 770       | -1.25814646 | 1.49E-06    |
| TRO          | 7216      | -1.26647948 | 0.004667759 |
| BLID         | 414899    | -1.26847783 | 0.001263684 |
| KIAA0895L    | 653319    | -1.26907792 | 0.005501874 |
| ARL9         | 132946    | -1.26999429 | 0.000565763 |
| SLC44A1      | 23446     | -1.28023025 | 0.001119422 |
| BNC2         | 54796     | -1.2816454  | 5.98E-06    |
| GSDMD        | 79792     | -1.28508    | 0.001738583 |
| EBLN2        | 55096     | -1.2861291  | 0.004399473 |
| ARL17B       | 100506084 | -1.28714715 | 0.000344415 |
| TET1         | 80312     | -1.28815182 | 0.000340513 |
| ARHGEF3      | 50650     | -1.29268914 | 0.004204586 |
| CHRNE        | 1145      | -1.29420677 | 0.000412193 |
| LTC4S        | 4056      | -1.29709371 | 0.000813156 |
| CEP95        | 90799     | -1.30274155 | 0.001373354 |
| GLT8D2       | 83468     | -1.30689101 | 8.99E-05    |
| LINC00340    | 401237    | -1.31308508 | 0.007390322 |
| PDGFRA       | 5156      | -1.31580733 | 0.006999418 |
| TIA1         | 7072      | -1.32364657 | 0.000414702 |
| GYG2         | 8908      | -1.32660552 | 0.000552677 |

|           |        |             |             |
|-----------|--------|-------------|-------------|
| GPRASP1   | 9737   | -1.32884972 | 0.001605723 |
| ARSI      | 340075 | -1.3309127  | 0.00017445  |
| FES       | 2242   | -1.33097722 | 0.007300273 |
| BCL3      | 602    | -1.34823074 | 0.008261545 |
| LOC153684 | 153684 | -1.34982497 | 0.000787809 |
| IL26      | 55801  | -1.35442219 | 0.009143639 |
| FAM46A    | 55603  | -1.35541086 | 0.000517919 |
| FADS1     | 3992   | -1.39343734 | 0.006329085 |
| ANXA2R    | 389289 | -1.39715947 | 0.001613171 |
| TG        | 7038   | -1.41006929 | 0.00483972  |
| TRAPPC6A  | 79090  | -1.42788053 | 0.000820581 |
| FAM46B    | 115572 | -1.44769582 | 0.000542293 |
| HIST2H2BF | 440689 | -1.47271408 | 0.001056512 |
| SPATA22   | 84690  | -1.48042739 | 0.005287952 |
| MGC24103  | 158295 | -1.50580815 | 0.003939922 |
| PIM1      | 5292   | -1.51531215 | 0.006848851 |
| FAM110A   | 83541  | -1.51636988 | 0.000104188 |
| LOC283050 | 283050 | -1.53937626 | 0.008275229 |
| SPEG      | 10290  | -1.54745096 | 0.001409044 |
| GCHFR     | 2644   | -1.57985083 | 2.05E-05    |
| FGFR2     | 2263   | -1.58626982 | 0.000906132 |
| ALX1      | 8092   | -1.58880388 | 6.85E-05    |
| HOXA3     | 3200   | -1.59532383 | 0.005807129 |
| TMEM155   | 132332 | -1.60251183 | 0.002747805 |
| FADS2     | 9415   | -1.60530003 | 0.000102284 |
| SUSD2     | 56241  | -1.62862196 | 0.004932642 |
| ARAP3     | 64411  | -1.63147329 | 0.005007311 |
| FAM20C    | 56975  | -1.66676027 | 0.004399477 |
| LDLR      | 3949   | -1.66704895 | 3.22E-05    |
| RGS2      | 5997   | -1.67341748 | 0.007586636 |
| C4B       | 721    | -1.67378275 | 0.000848385 |
| PTPRU     | 10076  | -1.69993414 | 0.000485067 |
| EFNB2     | 1948   | -1.71160929 | 0.009350461 |
| LBP       | 3929   | -1.75648535 | 0.000924305 |
| LBR       | 3930   | -1.76406829 | 0.001207085 |
| DIRAS3    | 9077   | -1.76619683 | 0.001100028 |
| SLC25A29  | 123096 | -1.79158142 | 0.000135268 |
| PRRX1     | 5396   | -1.80501933 | 0.000504507 |
| LCTL      | 197021 | -1.83120354 | 0.002950946 |
| CLSTN3    | 9746   | -1.86061601 | 1.87E-06    |
| SCARB1    | 949    | -1.87734717 | 0.000346998 |
| BGN       | 633    | -1.895935   | 0.000201398 |
| C1QTNF5   | 114902 | -1.90516332 | 0.002840008 |
| DAPK2     | 23604  | -1.92031793 | 2.63E-05    |
| CRISPLD2  | 83716  | -1.92398487 | 0.005080723 |

|           |           |             |             |
|-----------|-----------|-------------|-------------|
| HLA-DMB   | 3109      | -1.93958857 | 7.65E-05    |
| HLA-DMA   | 3108      | -1.96244777 | 0.001603052 |
| EPHB4     | 2050      | -2.01800257 | 0.002242699 |
| RTP4      | 64108     | -2.02132531 | 0.000530825 |
| NLGN4X    | 57502     | -2.02775867 | 0.00072999  |
| LINC00537 | 203274    | -2.0311517  | 0.000439646 |
| PRRT2     | 112476    | -2.03424408 | 0.002013923 |
| NINJ1     | 4814      | -2.08237993 | 1.91E-06    |
| MEX3A     | 92312     | -2.0912254  | 5.67E-05    |
| SALL2     | 6297      | -2.0997793  | 0.001891203 |
| HLA-DRA   | 3122      | -2.11067145 | 0.000679094 |
| B4GALT5   | 9334      | -2.11369822 | 0.002013471 |
| CLDN23    | 137075    | -2.15172437 | 0.001834931 |
| CD82      | 3732      | -2.15380802 | 0.002268749 |
| LPCAT2    | 54947     | -2.1583298  | 0.004119007 |
| CECR7     | 100130418 | -2.16062338 | 0.002174221 |
| QPRT      | 23475     | -2.16073244 | 0.003226824 |
| KCNJ2     | 3759      | -2.17037533 | 0.003753219 |
| DDIT4L    | 115265    | -2.18288362 | 0.00036771  |
| ZFPM2     | 23414     | -2.21129775 | 6.85E-05    |
| DPYSL3    | 1809      | -2.24195114 | 0.002152659 |
| OSBPL7    | 114881    | -2.25082411 | 5.21E-05    |
| TMSB15B   | 286527    | -2.25101827 | 0.000346397 |
| SGK223    | 157285    | -2.27567216 | 0.000133146 |
| PRUNE2    | 158471    | -2.27792568 | 0.000183914 |
| ANGPT1    | 284       | -2.30886574 | 0.005629818 |
| SOX4      | 6659      | -2.33594395 | 0.000171966 |
| FAM198B   | 51313     | -2.34237176 | 0.009324107 |
| MILR1     | 284021    | -2.34393312 | 6.84E-05    |
| SERINC2   | 347735    | -2.34795072 | 0.003880812 |
| SCD       | 6319      | -2.36146949 | 5.46E-05    |
| MX1       | 4599      | -2.36522633 | 0.008567268 |
| INSIG1    | 3638      | -2.39612646 | 0.001102918 |
| LAMA4     | 3910      | -2.41302926 | 0.003526554 |
| TSPAN18   | 90139     | -2.4166583  | 0.003026347 |
| OLFML2B   | 25903     | -2.47318639 | 0.004624003 |
| PDE7B     | 27115     | -2.54485972 | 0.000566493 |
| SELENBP1  | 8991      | -2.57149067 | 0.001000492 |
| SNAI1     | 6615      | -2.60617699 | 6.86E-05    |
| CEBPA     | 1050      | -2.60936458 | 4.73E-05    |
| NFE2      | 4778      | -2.61653154 | 0.000164902 |
| LSP1      | 4046      | -2.64107157 | 0.000623037 |
| TPD52L1   | 7164      | -2.65415057 | 0.005698671 |
| GXYLT2    | 727936    | -2.65827134 | 0.000665306 |
| RASD1     | 51655     | -2.66140963 | 0.001253357 |

|          |        |             |             |
|----------|--------|-------------|-------------|
| LRRC17   | 10234  | -2.6670589  | 2.75E-05    |
| ITGA10   | 8515   | -2.67359291 | 0.006076972 |
| MFAP2    | 4237   | -2.70749384 | 0.000109299 |
| SOX11    | 6664   | -2.74402671 | 0.000750752 |
| SLC1A3   | 6507   | -2.77431771 | 0.007214163 |
| EVI2A    | 2123   | -2.80395855 | 7.28E-05    |
| LEPREL1  | 55214  | -2.82078193 | 0.000932461 |
| GAS1     | 2619   | -2.83675578 | 0.000385498 |
| MARCKSL1 | 65108  | -2.85247512 | 0.000126069 |
| RARRES3  | 5920   | -2.89255753 | 0.001604633 |
| CECR1    | 51816  | -2.9743813  | 0.003572506 |
| S100A4   | 6275   | -2.9989826  | 0.005860374 |
| NETO2    | 81831  | -3.04040622 | 0.000205988 |
| COLEC12  | 81035  | -3.04793665 | 0.000313906 |
| KRT18P55 | 284085 | -3.07001994 | 0.008007004 |
| KRT18    | 3875   | -3.20727024 | 0.003875396 |
| GABRE    | 2564   | -3.25998595 | 0.006883817 |
| CLIC3    | 9022   | -3.51467744 | 8.78E-05    |
| HOXB5    | 3215   | -3.56619466 | 1.79E-07    |
| CHI3L1   | 1116   | -3.62096426 | 0.008584458 |
| RBP4     | 5950   | -3.62514502 | 0.007420069 |
| HAPLN1   | 1404   | -3.65329591 | 0.001880694 |
| BDKRB2   | 624    | -3.66134895 | 0.006936445 |
| CDKN1C   | 1028   | -3.74402937 | 0.000130451 |
| PTN      | 5764   | -3.74500877 | 0.006359698 |
| A2M      | 2      | -3.78427694 | 0.001732923 |
| IFITM1   | 8519   | -3.81919053 | 0.000721663 |
| BDKRB1   | 623    | -3.917766   | 0.003673944 |
| FAM20A   | 54757  | -4.03922119 | 1.99E-05    |
| PITX2    | 5308   | -4.07876928 | 0.000122716 |
| SCRG1    | 11341  | -4.09800409 | 0.001415874 |
| HOXB4    | 3214   | -4.43603317 | 5.03E-07    |
| SUSD3    | 203328 | -4.58407134 | 0.000677915 |
| HOXB2    | 3212   | -4.90609799 | 3.17E-05    |
| GGT5     | 2687   | -5.62311445 | 0.000281689 |
| HOXB6    | 3216   | -6.71605634 | 1.60E-05    |

**Table S4 Differentially expressed genes o8-o4**

| <b>Gene Symbol</b> | <b>Gene ID</b> | <b>logFC</b> | <b>p-value</b> |
|--------------------|----------------|--------------|----------------|
| IGFBP2             | 3485           | 3.58812777   | 0.00185627     |
| NTF3               | 4908           | 2.272742492  | 0.000934243    |
| TNFRSF11B          | 4982           | 2.241457155  | 0.00067049     |
| CACNB4             | 785            | 2.170279048  | 0.001810112    |
| EGR2               | 1959           | 1.977989108  | 0.002693097    |
| TNS3               | 64759          | 1.921564525  | 0.007133874    |
| BHLHE41            | 79365          | 1.874450112  | 0.003674915    |
| LUM                | 4060           | 1.861998859  | 0.004426424    |
| LIMCH1             | 22998          | 1.672198804  | 0.006892034    |
| EPDR1              | 54749          | 1.59874427   | 0.007826259    |
| ITGA11             | 22801          | 1.586363992  | 0.002439436    |
| MFAP5              | 8076           | 1.575001684  | 0.000722107    |
| HIST1H1C           | 3006           | 1.566321608  | 0.001539674    |
| FNIP2              | 57600          | 1.549523261  | 0.007421094    |
| SYT12              | 91683          | 1.529691033  | 0.009192308    |
| TM4SF20            | 79853          | 1.479003006  | 0.003364446    |
| STK38L             | 23012          | 1.40132438   | 0.000622039    |
| EFEMP1             | 2202           | 1.376318392  | 0.008803179    |
| SAMD5              | 389432         | 1.342970852  | 0.00273421     |
| BST1               | 683            | 1.330750812  | 0.007759965    |
| C11orf96           | 387763         | 1.322299824  | 0.002345648    |
| ANTXR1             | 84168          | 1.314691507  | 0.005811314    |
| UACA               | 55075          | 1.31456524   | 0.000371347    |
| OCLN               | 100506658      | 1.30010259   | 0.001354151    |
| KIAA1462           | 57608          | 1.291125544  | 0.008075084    |
| PMEPA1             | 56937          | 1.284490614  | 0.00972049     |
| LOC100507421       | 100507421      | 1.271945775  | 0.00022935     |
| CRYAB              | 1410           | 1.270782286  | 0.008858956    |
| TGFB3              | 7043           | 1.269652779  | 0.006796896    |
| LOC284998          | 284998         | 1.269360213  | 0.000665789    |
| GLS                | 2744           | 1.258634341  | 0.000884256    |
| SNORA28            | 677811         | 1.242692719  | 0.003474238    |
| IGFBP7             | 3490           | 1.228202879  | 6.49E-05       |
| C1QTNF5            | 114902         | 1.219239951  | 0.002010275    |
| SORBS2             | 8470           | 1.214589103  | 0.006586365    |
| TGFBR1             | 7046           | 1.210927766  | 0.008816987    |
| C21orf7            | 56911          | 1.199690996  | 0.000493793    |
| GRAMD3             | 65983          | 1.161645967  | 0.002392159    |
| HAPLN3             | 145864         | 1.150635615  | 0.00573585     |
| CMAHP              | 8418           | 1.146075133  | 0.003198057    |
| EPAS1              | 2034           | 1.145418337  | 0.00472347     |



|            |        |             |             |
|------------|--------|-------------|-------------|
| RNF141     | 50862  | 1.143345456 | 0.000693771 |
| HIST1H2BK  | 85236  | 1.13349313  | 0.000270741 |
| SERPINE2   | 5270   | 1.130381305 | 0.000459067 |
| CYB5R1     | 51706  | 1.125720516 | 0.004996946 |
| ABTB2      | 25841  | 1.122645857 | 0.001218819 |
| TSPAN3     | 10099  | 1.115300831 | 0.000287802 |
| SERPINI1   | 5274   | 1.104648577 | 0.002011882 |
| MRVI1      | 10335  | 1.100421434 | 0.002275723 |
| C1orf198   | 84886  | 1.099284883 | 0.004961309 |
| RUNX1      | 861    | 1.094901982 | 0.002901509 |
| SCD        | 6319   | 1.094348811 | 0.000584738 |
| CYP27A1    | 1593   | 1.087853477 | 0.00238493  |
| C15orf48   | 84419  | 1.073999526 | 0.002358686 |
| PLSCR4     | 57088  | 1.073006618 | 0.008167942 |
| SSPN       | 8082   | 1.071752892 | 0.002619864 |
| GSG1       | 83445  | 1.062220912 | 3.34E-05    |
| HIST2H2AA4 | 723790 | 1.051616292 | 0.000599444 |
| TIMP1      | 7076   | 1.046112877 | 0.000538151 |
| SGK223     | 157285 | 1.041759841 | 0.001367735 |
| ITPR1      | 3708   | 1.019807364 | 0.008504653 |
| ACTA2      | 59     | 1.019287193 | 0.000935898 |
| MEF2A      | 4205   | 1.019017956 | 0.002649631 |
| CYP2U1     | 113612 | 1.018164569 | 0.009110113 |
| HIST1H2BC  | 8347   | 1.010995135 | 0.000511118 |
| CCPG1      | 9236   | 1.001263481 | 0.0077068   |
| DRAM1      | 55332  | 0.993651374 | 0.006516136 |
| PKD2       | 5311   | 0.992581801 | 0.003175066 |
| TBC1D12    | 23232  | 0.990594283 | 0.006852778 |
| ASAH1      | 427    | 0.988261551 | 0.009154517 |
| ASB5       | 140458 | 0.981258938 | 0.008121717 |
| TANC1      | 85461  | 0.977707353 | 0.004387676 |
| SCN9A      | 6335   | 0.97357403  | 0.002113454 |
| ANGPTL4    | 51129  | 0.958248466 | 0.001847484 |
| OSBPL10    | 114884 | 0.946069501 | 0.008228362 |
| PNPLA3     | 80339  | 0.942729078 | 0.008863258 |
| SYNGR2     | 9144   | 0.927593245 | 0.001925404 |
| CALD1      | 800    | 0.925074155 | 0.000328099 |
| ZNF219     | 51222  | 0.919521308 | 0.002805089 |
| SH3PXD2A   | 9644   | 0.90826866  | 0.008891516 |
| ADAMTS14   | 140766 | 0.907180624 | 0.008996804 |
| LOC283070  | 283070 | 0.904871599 | 0.002924895 |
| KCTD20     | 222658 | 0.90395439  | 7.85E-05    |
| LAMP2      | 3920   | 0.899005008 | 0.006149277 |
| CAND2      | 23066  | 0.896903484 | 0.009834523 |
| LHFP       | 10186  | 0.896612536 | 0.009137589 |

|              |           |             |             |
|--------------|-----------|-------------|-------------|
| CMTM4        | 146223    | 0.895736897 | 0.000374842 |
| LRP5         | 4041      | 0.895038739 | 0.005638034 |
| HIST1H2BG    | 8339      | 0.885130645 | 0.000657723 |
| KLHL24       | 54800     | 0.882837135 | 0.004274831 |
| HIST1H2BH    | 8345      | 0.876980458 | 0.001122111 |
| OSTM1        | 28962     | 0.869242781 | 0.003740734 |
| MSMO1        | 6307      | 0.862192223 | 0.001648416 |
| SLC36A1      | 206358    | 0.859561947 | 0.003219309 |
| TMEM66       | 51669     | 0.85645388  | 0.005050499 |
| LATS2        | 26524     | 0.85538667  | 0.006320596 |
| PPP1R14A     | 94274     | 0.85470962  | 0.003641797 |
| MAN2A2       | 4122      | 0.854544332 | 0.000953951 |
| COL4A2       | 1284      | 0.850890291 | 0.003255037 |
| PACS2        | 23241     | 0.846422122 | 0.000142341 |
| ITM2B        | 9445      | 0.841779403 | 0.003875048 |
| LOC100129550 | 100129550 | 0.84112941  | 0.008481967 |
| HIST1H2BM    | 8342      | 0.839795175 | 0.000521508 |
| TSC22D1      | 8848      | 0.834600372 | 0.008973047 |
| CDK6         | 1021      | 0.834348535 | 0.002836483 |
| MFSD6        | 54842     | 0.827575811 | 0.006211937 |
| DSTN         | 11034     | 0.821986529 | 0.000499642 |
| HIST1H2BL    | 8340      | 0.821055941 | 0.001845634 |
| CLN5         | 1203      | 0.813528599 | 0.001342421 |
| JAZF1        | 221895    | 0.811823704 | 0.007600501 |
| KPNA1        | 3836      | 0.810479195 | 0.000299245 |
| FAM26E       | 254228    | 0.805493901 | 0.004523412 |
| FLJ43663     | 378805    | 0.80527331  | 0.002005049 |
| HIST1H2BD    | 3017      | 0.799076916 | 0.001335265 |
| GLRX         | 2745      | 0.798475945 | 3.93E-05    |
| HIST1H2BO    | 8348      | 0.796644051 | 0.002181089 |
| HGD          | 3081      | 0.794544584 | 0.007660633 |
| GABARAPL1    | 23710     | 0.790396624 | 0.004344725 |
| NUAK1        | 9891      | 0.781559559 | 0.003106952 |
| COX7A1       | 1346      | 0.781487322 | 0.008719858 |
| RFTN1        | 23180     | 0.775992436 | 0.000778446 |
| ULK2         | 9706      | 0.774668075 | 0.007883575 |
| LOC283454    | 283454    | 0.770912504 | 0.003753561 |
| JAM3         | 83700     | 0.768953623 | 0.002446679 |
| SPG20        | 23111     | 0.768069426 | 0.00737594  |
| HIST1H2BB    | 3018      | 0.767098144 | 0.001395387 |
| HIST1H2BI    | 8346      | 0.763839261 | 0.00103403  |
| IDI1         | 3422      | 0.754627049 | 0.000302925 |
| SNX1         | 6642      | 0.753037889 | 0.001054872 |
| CLN8         | 2055      | 0.749436918 | 0.004762517 |
| IL6          | 3569      | 0.735884618 | 0.003666364 |

|              |           |             |             |
|--------------|-----------|-------------|-------------|
| OPTN         | 10133     | 0.73348467  | 7.63E-05    |
| NDFIP2       | 54602     | 0.726246138 | 0.001134625 |
| AK4          | 205       | 0.723688482 | 0.004692996 |
| ZMYM6NB      | 100506144 | 0.721180638 | 0.001579801 |
| CNN3         | 1266      | 0.717768176 | 0.00338163  |
| ATP6V1G1     | 9550      | 0.709535322 | 0.002352876 |
| CCND1        | 595       | 0.704206586 | 0.00673791  |
| CMTM3        | 123920    | 0.700625305 | 0.000454689 |
| SPARC        | 6678      | 0.69948814  | 0.003405316 |
| TPST2        | 8459      | 0.69929907  | 0.007282383 |
| RNF11        | 26994     | 0.693333121 | 0.002096412 |
| GRAMD4       | 23151     | 0.693167108 | 0.002149864 |
| SLC2A14      | 144195    | 0.693070268 | 0.002589691 |
| SYNPO2       | 171024    | 0.6913938   | 0.005644573 |
| RCN2         | 5955      | 0.691052508 | 0.001660689 |
| COX3         | 4514      | 0.69047682  | 0.003520416 |
| PTTG1IP      | 754       | 0.690456594 | 0.008845955 |
| LOC100216545 | 100216545 | 0.690250427 | 0.002762226 |
| EIF4A2       | 1974      | 0.686420253 | 0.006765792 |
| TRAPPC6A     | 79090     | 0.68381279  | 0.004532759 |
| SQRDL        | 58472     | 0.682297063 | 0.003951195 |
| RCBTB2       | 1102      | 0.677208535 | 0.006611575 |
| IER3         | 8870      | 0.673859981 | 0.007271139 |
| PTPRM        | 5797      | 0.673650751 | 0.009802064 |
| PTGIR        | 5739      | 0.673151252 | 0.007256615 |
| IGIP         | 492311    | 0.670285207 | 0.004459348 |
| FEZ1         | 9638      | 0.667576331 | 0.002426549 |
| ATP11B       | 23200     | 0.666758404 | 0.000235267 |
| RNF130       | 55819     | 0.662613294 | 0.001797467 |
| ME1          | 4199      | 0.66195783  | 0.00981745  |
| ICAM4        | 3386      | 0.660750007 | 0.000955117 |
| FSTL1        | 11167     | 0.656525582 | 0.00368595  |
| B3GALNT1     | 8706      | 0.648157852 | 0.000314652 |
| ARL6IP5      | 10550     | 0.639049034 | 0.000293816 |
| SLC1A7       | 6512      | 0.636993987 | 0.001642731 |
| STX12        | 23673     | 0.636792095 | 0.000312113 |
| HRK          | 8739      | 0.636661602 | 0.003729642 |
| SGCB         | 6443      | 0.635601914 | 0.002428916 |
| COX1         | 4512      | 0.633437337 | 0.005592642 |
| LYSMD4       | 145748    | 0.632111474 | 0.00620864  |
| MANBA        | 4126      | 0.630594678 | 0.00597419  |
| KCTD10       | 83892     | 0.627123603 | 0.00225528  |
| CYTB         | 4519      | 0.626139876 | 0.006723263 |
| PLEKHA1      | 59338     | 0.625486446 | 0.000940835 |
| ACYP2        | 98        | 0.624076718 | 4.84E-05    |

|              |           |              |             |
|--------------|-----------|--------------|-------------|
| SPRY1        | 10252     | 0.623481722  | 0.006549089 |
| FAP          | 2191      | 0.623377603  | 0.001242482 |
| PPP1R3B      | 79660     | 0.621853603  | 0.005135811 |
| CYLD         | 1540      | 0.615658803  | 0.005071024 |
| TP53INP2     | 58476     | 0.614002295  | 0.001242183 |
| ACSL3        | 2181      | 0.602250887  | 0.005023082 |
| C5orf15      | 56951     | 0.59953353   | 0.006177723 |
| AHCYL2       | 23382     | 0.598162148  | 0.002565514 |
| TMEM80       | 283232    | 0.592377107  | 0.001274481 |
| KLHL3        | 26249     | 0.591946212  | 0.004405237 |
| ATP6V0E1     | 8992      | 0.591243387  | 0.004319673 |
| TIMP2        | 7077      | 0.590962651  | 0.002165644 |
| RBMS1        | 5937      | 0.589976301  | 0.001807491 |
| TWSG1        | 57045     | 0.589623783  | 0.000257384 |
| FAM18B2      | 201158    | 0.588284538  | 0.00230413  |
| TRIM22       | 10346     | 0.587393446  | 0.002212235 |
| SLC35F5      | 80255     | 0.586855241  | 0.00589764  |
| AGPAT2       | 10555     | 0.586779054  | 0.00140361  |
| ITPRIPL2     | 162073    | 0.586145509  | 0.000409137 |
| YPEL5        | 51646     | 0.585914973  | 0.001901595 |
| SQSTM1       | 8878      | 0.582147448  | 0.008564873 |
| CAMK1D       | 57118     | 0.581580302  | 0.008007691 |
| APITD1       | 378708    | -0.580834104 | 0.000661354 |
| KHDRBS1      | 10657     | -0.580913359 | 0.002580456 |
| DBF4         | 10926     | -0.582692205 | 0.002047139 |
| AZI1         | 22994     | -0.584211661 | 0.003253157 |
| C20orf72     | 92667     | -0.587674761 | 0.0028858   |
| LOC100127983 | 100127983 | -0.589305536 | 0.000466804 |
| NRIP1        | 8204      | -0.589685678 | 0.002231987 |
| HMBS         | 3145      | -0.589857849 | 0.004923388 |
| RPS6KA4      | 8986      | -0.590801747 | 0.002255236 |
| TUBG1        | 7283      | -0.59654917  | 0.003113043 |
| ARHGAP11A    | 9824      | -0.596946109 | 0.00635246  |
| NT5C         | 30833     | -0.597371661 | 0.009905926 |
| IFRD2        | 7866      | -0.599028635 | 7.02E-05    |
| TOX          | 9760      | -0.60212939  | 8.51E-05    |
| OSR1         | 130497    | -0.602458066 | 0.002881327 |
| ARPC1A       | 10552     | -0.603036917 | 0.005673845 |
| MNS1         | 55329     | -0.60404867  | 0.003561448 |
| SRSF3        | 6428      | -0.605578177 | 0.000285286 |
| -            | 100508996 | -0.608833919 | 0.005687329 |
| CDK2         | 1017      | -0.61110077  | 0.006625624 |
| CBLB         | 868       | -0.613097143 | 0.004512411 |
| WEE1         | 7465      | -0.616452737 | 0.00268392  |
| DERA         | 51071     | -0.619427402 | 0.00770063  |

|          |           |              |             |
|----------|-----------|--------------|-------------|
| HIRIP3   | 8479      | -0.619621757 | 0.001418126 |
| CEP128   | 145508    | -0.619712228 | 0.005599671 |
| LSM2     | 57819     | -0.619999331 | 0.009717348 |
| RPL36A   | 6173      | -0.620671905 | 0.006553921 |
| PPARG    | 5468      | -0.621311113 | 0.00716305  |
| HIST2H3D | 653604    | -0.622054854 | 0.005676556 |
| POLD3    | 10714     | -0.622223961 | 0.003435541 |
| BRIP1    | 83990     | -0.62444485  | 0.006048135 |
| SPTLC3   | 55304     | -0.625316552 | 0.003382476 |
| CSE1L    | 1434      | -0.628843643 | 0.000789135 |
| HIST1H3E | 8353      | -0.633297331 | 0.006507755 |
| NASP     | 4678      | -0.635312341 | 0.001348714 |
| ALYREF   | 10189     | -0.63794788  | 0.004819735 |
| BCL2L12  | 83596     | -0.638489512 | 0.007080638 |
| LOC81691 | 81691     | -0.643314767 | 0.005729407 |
| RGMB     | 285704    | -0.643448623 | 0.006012444 |
| RPLP0    | 6175      | -0.644711139 | 0.002518001 |
| SUV39H1  | 6839      | -0.645208867 | 0.005635866 |
| -        | 100508181 | -0.648930326 | 0.001403484 |
| THAP10   | 56906     | -0.651480165 | 0.000727241 |
| HNRNPH1  | 3187      | -0.65341093  | 0.00239848  |
| NR2C2AP  | 126382    | -0.655877441 | 0.000442433 |
| PTGS1    | 5742      | -0.660420787 | 0.001589099 |
| FANCA    | 2175      | -0.669120583 | 0.003236936 |
| RPSA     | 3921      | -0.669189295 | 0.002708495 |
| CDCA4    | 55038     | -0.674891922 | 0.002881876 |
| CBX5     | 23468     | -0.675189168 | 0.009346077 |
| TARBP2   | 6895      | -0.676438555 | 0.007652133 |
| RPS8     | 6202      | -0.67715384  | 0.002096189 |
| MCM6     | 4175      | -0.679901796 | 0.003323898 |
| TELO2    | 9894      | -0.680369223 | 0.002614422 |
| FAM72A   | 729533    | -0.684069757 | 0.000445778 |
| PAQR4    | 124222    | -0.685136733 | 0.009852718 |
| RPLP0P3  | 122589    | -0.687699405 | 0.004746001 |
| BUB3     | 9184      | -0.688445052 | 0.004451076 |
| TMEM194A | 23306     | -0.689016674 | 0.000371524 |
| CLSPN    | 63967     | -0.696382137 | 0.000641496 |
| HNRNPD   | 3184      | -0.696723563 | 0.001588811 |
| RPLP0P5  | 643779    | -0.697903634 | 0.002209406 |
| PLEK2    | 26499     | -0.698742514 | 0.002310087 |
| RHEBL1   | 121268    | -0.700562156 | 0.003198056 |
| SNRPB    | 6628      | -0.701320102 | 0.004232815 |
| VIM      | 7431      | -0.70411585  | 0.000176752 |
| SLC25A5  | 292       | -0.709965047 | 0.001049383 |
| SGOL2    | 151246    | -0.714246081 | 0.000705083 |

|           |        |              |             |
|-----------|--------|--------------|-------------|
| RPSAP52   | 204010 | -0.714787917 | 0.000784918 |
| HIST1H2AL | 8332   | -0.717874196 | 0.004175303 |
| THOP1     | 7064   | -0.718690507 | 0.002755463 |
| MIS18BP1  | 55320  | -0.719064759 | 0.000343202 |
| BRCA2     | 675    | -0.720622288 | 0.000300506 |
| RMI1      | 80010  | -0.724077548 | 6.24E-06    |
| HMGN2     | 3151   | -0.725421409 | 0.004510832 |
| WHSC1     | 7468   | -0.727939439 | 0.005942831 |
| VRK1      | 7443   | -0.729112849 | 0.00397416  |
| MYPN      | 84665  | -0.733341841 | 0.008933863 |
| E2F8      | 79733  | -0.735536431 | 0.002313034 |
| FAM110A   | 83541  | -0.73687625  | 0.000702332 |
| PLK4      | 10733  | -0.7378172   | 0.00551516  |
| RPS2P32   | 256355 | -0.741031619 | 0.001084007 |
| CCNE2     | 9134   | -0.743601999 | 0.002461108 |
| LOC147727 | 147727 | -0.744203649 | 0.000319492 |
| IFI16     | 3428   | -0.744333638 | 0.00295728  |
| HPDL      | 84842  | -0.74735944  | 0.002678115 |
| EIF5A     | 1984   | -0.751277825 | 0.009191231 |
| C18orf54  | 162681 | -0.754598087 | 0.001476362 |
| TMEM121   | 80757  | -0.75494546  | 0.004966282 |
| WWC1      | 23286  | -0.755282333 | 0.007764474 |
| PSIP1     | 11168  | -0.755352108 | 0.002015782 |
| FANCC     | 2176   | -0.756775919 | 0.000757189 |
| NCAPH2    | 29781  | -0.757983679 | 0.006002264 |
| HIST1H2AM | 8336   | -0.762936266 | 0.008059259 |
| TUBB6     | 84617  | -0.765832748 | 0.000961389 |
| STIL      | 6491   | -0.766722443 | 0.00437611  |
| GJC1      | 10052  | -0.77214882  | 0.002629791 |
| FANCD2    | 2177   | -0.777860005 | 0.002184876 |
| SUV39H2   | 79723  | -0.778986591 | 0.004998302 |
| FAM46B    | 115572 | -0.78226011  | 0.001367919 |
| TMPO      | 7112   | -0.782606064 | 9.98E-05    |
| SRM       | 6723   | -0.783377458 | 0.002950236 |
| WDR76     | 79968  | -0.788577427 | 0.000930809 |
| SOCS3     | 9021   | -0.793784842 | 0.001426664 |
| RPS2      | 6187   | -0.796814205 | 0.000549611 |
| PCNA      | 5111   | -0.80427776  | 0.000241065 |
| EXOSC8    | 11340  | -0.806893715 | 0.005569719 |
| RFC3      | 5983   | -0.807203433 | 0.002843827 |
| CSF1R     | 1436   | -0.813092074 | 0.003179216 |
| HIST1H2BE | 8344   | -0.813135742 | 0.003141283 |
| FBL       | 2091   | -0.813426324 | 0.002032671 |
| NRM       | 11270  | -0.820207599 | 0.005610064 |
| BLVRB     | 645    | -0.822063946 | 0.007744326 |

|              |           |              |             |
|--------------|-----------|--------------|-------------|
| ENTPD6       | 955       | -0.83311931  | 0.005822067 |
| WDR34        | 89891     | -0.8333859   | 0.000638621 |
| POLA2        | 23649     | -0.836787513 | 0.006422252 |
| RAD51AP1     | 10635     | -0.837181411 | 0.003370957 |
| SMC2         | 10592     | -0.842436275 | 0.00061567  |
| DEPDC1B      | 55789     | -0.842554973 | 0.007085235 |
| TDP1         | 55775     | -0.845333997 | 0.008606102 |
| NEIL3        | 55247     | -0.848157112 | 0.002231017 |
| DOCK10       | 55619     | -0.848926771 | 0.004330574 |
| USP1         | 7398      | -0.850744117 | 0.000161008 |
| RIBC2        | 26150     | -0.851366328 | 0.000570752 |
| CHAF1A       | 10036     | -0.852837279 | 0.004318838 |
| LOC100130111 | 100130111 | -0.857353657 | 0.00191294  |
| CTSC         | 1075      | -0.860387619 | 0.005481697 |
| HIST1H2BF    | 8343      | -0.8614009   | 0.001291913 |
| DDX39A       | 10212     | -0.863302105 | 0.004444169 |
| TUBB4B       | 10383     | -0.865010037 | 0.004160457 |
| BAALC        | 79870     | -0.865650248 | 0.001270493 |
| CHEK1        | 1111      | -0.870563619 | 0.001752062 |
| HAUS8        | 93323     | -0.87191634  | 0.001586223 |
| CENPO        | 79172     | -0.873249351 | 0.004100343 |
| SGOL1        | 151648    | -0.87416019  | 0.007201349 |
| CDC25A       | 993       | -0.877325762 | 0.003618326 |
| C15orf23     | 90417     | -0.880580663 | 0.007276484 |
| TUBA1A       | 7846      | -0.883237369 | 0.002604235 |
| DNMT1        | 1786      | -0.884885182 | 0.001686532 |
| CENPJ        | 55835     | -0.886996313 | 0.002562897 |
| RPL39L       | 116832    | -0.887698439 | 0.008075003 |
| TMSB15B      | 286527    | -0.892400773 | 0.007530196 |
| ASB10        | 136371    | -0.898050537 | 0.007571626 |
| OLFML3       | 56944     | -0.90277063  | 0.000380648 |
| RPA3         | 6119      | -0.903637796 | 0.000767872 |
| POLA1        | 5422      | -0.904521419 | 0.000274939 |
| CALB2        | 794       | -0.904823563 | 0.000301986 |
| C4orf46      | 201725    | -0.91249443  | 0.000200212 |
| TEX30        | 93081     | -0.913003043 | 0.002344575 |
| NEURL1B      | 54492     | -0.913590288 | 0.006793279 |
| TUBB         | 203068    | -0.914406654 | 0.001483839 |
| WDR62        | 284403    | -0.918648885 | 0.003069366 |
| WDHD1        | 11169     | -0.924093865 | 0.000872461 |
| HIST1H3H     | 8357      | -0.930781738 | 0.000999098 |
| C1orf112     | 55732     | -0.931497951 | 0.000433057 |
| HMGB1        | 3146      | -0.934152292 | 0.001753528 |
| ISM1         | 140862    | -0.935790828 | 0.008163354 |
| EMP2         | 2013      | -0.93803477  | 0.006899447 |

|              |           |              |             |
|--------------|-----------|--------------|-------------|
| MIOS         | 54468     | -0.949069348 | 0.009419222 |
| C14orf80     | 283643    | -0.951030902 | 0.00291484  |
| HNRNPA1L2    | 144983    | -0.96098271  | 0.000427447 |
| MT1F         | 4494      | -0.961991178 | 2.58E-05    |
| HIST1H3G     | 8355      | -0.963952326 | 0.006416012 |
| STMN1        | 3925      | -0.965407801 | 0.00362028  |
| LOC100289388 | 100289388 | -0.975338632 | 0.001996316 |
| AURKAPS1     | 6791      | -0.976915816 | 0.007921482 |
| DSN1         | 79980     | -0.97692135  | 0.000517749 |
| DNAJC9       | 23234     | -0.978445061 | 0.001707967 |
| CCDC99       | 54908     | -0.982774023 | 0.001499348 |
| GMNN         | 51053     | -0.98319783  | 0.000525749 |
| RFC5         | 5985      | -0.986844151 | 0.002025769 |
| PKN3         | 29941     | -0.999387525 | 0.004230054 |
| TUBA1C       | 84790     | -1.008819014 | 0.00146884  |
| FEN1         | 2237      | -1.008844637 | 0.000630245 |
| NCAPD2       | 9918      | -1.011946183 | 0.00035324  |
| RANBP1       | 5902      | -1.011948384 | 0.000703121 |
| KNTC1        | 9735      | -1.019401337 | 0.00075168  |
| MYO19        | 80179     | -1.019706575 | 0.000163436 |
| HN1          | 51155     | -1.025232686 | 0.009943271 |
| AXL          | 558       | -1.029531602 | 0.000765874 |
| RFC2         | 5982      | -1.032639036 | 0.002547922 |
| INCENP       | 3619      | -1.037337127 | 0.002359915 |
| POLD1        | 5424      | -1.049285988 | 0.001118489 |
| CDC7         | 8317      | -1.050166332 | 0.00023504  |
| RFC4         | 5984      | -1.05515218  | 0.000383939 |
| CKS1B        | 1163      | -1.058130674 | 0.001923888 |
| KIF20B       | 9585      | -1.05824731  | 0.00117645  |
| MCM3         | 4172      | -1.060461498 | 0.000934832 |
| FAM72D       | 728833    | -1.061436626 | 0.000614915 |
| GPSM2        | 29899     | -1.077755515 | 0.009593268 |
| KPNA2        | 3838      | -1.083214576 | 0.001923823 |
| MCM8         | 84515     | -1.089614267 | 0.00235876  |
| ADAMTS1      | 9510      | -1.091299469 | 0.00964706  |
| TUBA1B       | 10376     | -1.103366928 | 7.51E-05    |
| POLE2        | 5427      | -1.107436457 | 0.001061359 |
| ARHGAP11B    | 89839     | -1.107908793 | 0.004166868 |
| LBR          | 3930      | -1.108585906 | 0.000951567 |
| NCAPG2       | 54892     | -1.113884973 | 0.003294731 |
| MCM10        | 55388     | -1.125457708 | 0.002196509 |
| IRS1         | 3667      | -1.131081206 | 0.000663241 |
| ANPEP        | 290       | -1.135554238 | 0.001972825 |
| TIMELESS     | 8914      | -1.138555934 | 3.37E-05    |
| NCAPG        | 64151     | -1.142841365 | 0.000709568 |



|          |        |              |             |
|----------|--------|--------------|-------------|
| HELLS    | 3070   | -1.151587427 | 0.001779392 |
| HIST1H4D | 8360   | -1.152978144 | 0.003212423 |
| SPC24    | 147841 | -1.162797488 | 0.006882059 |
| ZWILCH   | 55055  | -1.163213716 | 0.00063583  |
| MIR31HG  | 554202 | -1.163255515 | 0.001032349 |
| PSMC3IP  | 29893  | -1.175503939 | 0.008496606 |
| BRCA1    | 672    | -1.18276621  | 0.000146704 |
| GALNT6   | 11226  | -1.185159542 | 0.005744284 |
| DTYMK    | 1841   | -1.187340866 | 0.000487326 |
| CDKN2C   | 1031   | -1.191854611 | 0.004097021 |
| PRIM1    | 5557   | -1.194550241 | 5.52E-05    |
| GINS3    | 64785  | -1.199783245 | 0.001669776 |
| NETO2    | 81831  | -1.2140947   | 0.004938505 |
| SAPCD2   | 89958  | -1.215669083 | 0.009325334 |
| GAS2L3   | 283431 | -1.219045638 | 0.004315233 |
| C19orf48 | 84798  | -1.220312794 | 0.003585174 |
| ERCC6L   | 54821  | -1.225645817 | 0.002257376 |
| EXO1     | 9156   | -1.229850167 | 0.002642517 |
| PCOLCE   | 5118   | -1.231848213 | 0.004436996 |
| RRM1     | 6240   | -1.234348612 | 6.66E-05    |
| ORC6     | 23594  | -1.234811985 | 0.002442079 |
| CENPH    | 64946  | -1.23604987  | 0.00124801  |
| UBE2T    | 29089  | -1.238943912 | 0.003192209 |
| LMNB1    | 4001   | -1.239083488 | 0.000315583 |
| NEK2     | 4751   | -1.246155227 | 0.003470451 |
| C1orf135 | 79000  | -1.251408898 | 0.001738774 |
| MT1X     | 4501   | -1.25164562  | 0.00339119  |
| H2AFX    | 3014   | -1.256578095 | 0.005382729 |
| CENPK    | 64105  | -1.257800822 | 0.00068645  |
| ATAD2    | 29028  | -1.25821065  | 0.00036521  |
| C11orf87 | 399947 | -1.259715099 | 0.002790734 |
| BARD1    | 580    | -1.265029722 | 0.000712319 |
| HIST1H1A | 3024   | -1.26965125  | 0.003840335 |
| PTTG3P   | 26255  | -1.276995257 | 0.005025955 |
| TCF19    | 6941   | -1.287344879 | 4.19E-05    |
| CDCA5    | 113130 | -1.291358424 | 0.00212835  |
| MCM4     | 4173   | -1.299421884 | 0.000167146 |
| HIST1H4L | 8368   | -1.308078575 | 0.0006909   |
| AIM1     | 202    | -1.31120297  | 0.000304186 |
| FANCG    | 2189   | -1.328831906 | 9.10E-05    |
| H2AFZ    | 3015   | -1.330025716 | 0.000794165 |
| IGFBP3   | 3486   | -1.337379569 | 0.008566336 |
| KIF18A   | 81930  | -1.342081084 | 0.002489007 |
| CDC25C   | 995    | -1.3501068   | 0.002266877 |
| RNASEH2A | 10535  | -1.353570873 | 0.002620034 |

|           |        |              |             |
|-----------|--------|--------------|-------------|
| ESCO2     | 157570 | -1.354960638 | 0.000500742 |
| E2F2      | 1870   | -1.363377552 | 0.009564445 |
| SMC4      | 10051  | -1.381994327 | 0.000240573 |
| MCM2      | 4171   | -1.402642111 | 0.001767387 |
| HIST1H2AI | 8329   | -1.406988957 | 0.00480992  |
| PSRC1     | 84722  | -1.430407112 | 0.002260821 |
| HMGB2     | 3148   | -1.443530416 | 0.000412417 |
| KIF22     | 3835   | -1.447333679 | 0.00205646  |
| TRIP13    | 9319   | -1.448529012 | 0.002027209 |
| CASC5     | 57082  | -1.457859709 | 0.001655006 |
| CENPM     | 79019  | -1.45828374  | 0.009709911 |
| CIT       | 11113  | -1.461842972 | 0.000563347 |
| ID1       | 3397   | -1.462048999 | 0.006813549 |
| POLQ      | 10721  | -1.469151482 | 0.000396958 |
| C16orf59  | 80178  | -1.484263232 | 0.001440546 |
| KIF4A     | 24137  | -1.489548527 | 0.003164573 |
| LIG1      | 3978   | -1.504180542 | 0.000864575 |
| POC1A     | 25886  | -1.505845063 | 0.001587044 |
| APOBEC3B  | 9582   | -1.516341615 | 0.002718937 |
| TRAIP     | 10293  | -1.525233463 | 0.000594329 |
| AURKB     | 9212   | -1.539084503 | 0.002748659 |
| ASF1B     | 55723  | -1.559259112 | 0.00616575  |
| KCNJ8     | 3764   | -1.561932559 | 0.008457651 |
| RMI2      | 116028 | -1.565880301 | 0.003404514 |
| EZH2      | 2146   | -1.568511418 | 0.000310899 |
| CENPW     | 387103 | -1.56901378  | 0.004013989 |
| MCM7      | 4176   | -1.573639101 | 7.80E-05    |
| PTGER2    | 5732   | -1.575969531 | 0.001784089 |
| UHRF1     | 29128  | -1.59024531  | 0.001651282 |
| FBXO5     | 26271  | -1.609452902 | 0.000453703 |
| C11orf82  | 220042 | -1.609893279 | 0.000292734 |
| FAM54A    | 113115 | -1.611715995 | 0.000711294 |
| SLC38A5   | 92745  | -1.613850326 | 0.004322671 |
| MCM5      | 4174   | -1.621514427 | 0.001563992 |
| SKA1      | 220134 | -1.630522648 | 0.001437988 |
| RAD51     | 5888   | -1.635287414 | 0.003444201 |
| E2F1      | 1869   | -1.643864333 | 0.002297361 |
| CHAF1B    | 8208   | -1.649103609 | 0.000277659 |
| HIST1H3D  | 8351   | -1.68096322  | 0.004688398 |
| BLM       | 641    | -1.68889919  | 0.000283637 |
| HIST1H3F  | 8968   | -1.697743145 | 0.003120513 |
| ZWINT     | 11130  | -1.702734164 | 0.003341039 |
| CHTF18    | 63922  | -1.703678612 | 0.000116707 |
| MAD2L1    | 4085   | -1.710744628 | 0.00078803  |
| DEPDC1    | 55635  | -1.713576313 | 0.001097817 |

|          |        |              |             |
|----------|--------|--------------|-------------|
| RACGAP1  | 29127  | -1.72456543  | 0.000798057 |
| GIN54    | 84296  | -1.726633599 | 0.002175475 |
| SKA3     | 221150 | -1.727208384 | 0.001318188 |
| RPL22L1  | 200916 | -1.73460876  | 0.003057885 |
| HIST1H4B | 8366   | -1.740197395 | 0.000334988 |
| GIN51    | 9837   | -1.760323849 | 0.004150324 |
| KIFC1    | 3833   | -1.77579159  | 0.004146034 |
| KITLG    | 4254   | -1.788875516 | 0.001892422 |
| FANCI    | 55215  | -1.803619963 | 0.000313314 |
| KIF23    | 9493   | -1.806968127 | 0.001026633 |
| MT1A     | 4489   | -1.82053761  | 0.004832416 |
| CENPE    | 1062   | -1.822177006 | 0.00112845  |
| TPX2     | 22974  | -1.832600722 | 0.004463657 |
| TACC3    | 10460  | -1.83749735  | 0.002518183 |
| CDKN3    | 1033   | -1.856951125 | 0.007115311 |
| MKI67    | 4288   | -1.86201852  | 0.003346781 |
| MLF1IP   | 79682  | -1.874486565 | 0.003673338 |
| MT1M     | 4499   | -1.886204081 | 0.004229128 |
| CKS2     | 1164   | -1.930290494 | 0.003924253 |
| RRM2     | 6241   | -1.938510533 | 0.001057182 |
| MELK     | 9833   | -1.951014897 | 0.00057157  |
| RECQL4   | 9401   | -1.952105376 | 0.000635896 |
| CCNA2    | 890    | -1.966161366 | 0.001429133 |
| SERPINA9 | 327657 | -1.97159352  | 0.000206994 |
| HIST1H4C | 8364   | -1.984841537 | 0.000214177 |
| RAD54L   | 8438   | -1.992661191 | 0.000748328 |
| HAS2     | 3037   | -1.999407843 | 0.007812271 |
| F2RL2    | 2151   | -1.999635431 | 0.004274791 |
| KIF11    | 3832   | -2.007974985 | 0.001806004 |
| GIN52    | 51659  | -2.015896572 | 0.003742685 |
| S1PR3    | 1903   | -2.02232105  | 0.009971822 |
| FOXM1    | 2305   | -2.028119513 | 0.003853165 |
| CCNB1    | 891    | -2.03744571  | 0.003306053 |
| NUF2     | 83540  | -2.054583674 | 0.000729505 |
| GTSE1    | 51512  | -2.05903212  | 0.003125884 |
| TTK      | 7272   | -2.064627723 | 0.000742692 |
| MND1     | 84057  | -2.072200184 | 0.000378894 |
| KIF15    | 56992  | -2.073502307 | 0.000279872 |
| CENPA    | 1058   | -2.075777394 | 0.00211765  |
| KIF14    | 9928   | -2.077927383 | 0.00083613  |
| CDC20    | 991    | -2.079584574 | 0.00466933  |
| PRC1     | 9055   | -2.11003192  | 0.005178582 |
| OIP5     | 11339  | -2.129082732 | 0.001002884 |
| MT1E     | 4493   | -2.147371475 | 0.002721111 |
| MMP1     | 4312   | -2.149089606 | 0.004413531 |

|          |        |              |             |
|----------|--------|--------------|-------------|
| MT1L     | 4500   | -2.190360555 | 0.003140983 |
| HIST1H1B | 3009   | -2.199161379 | 0.000942284 |
| CEP55    | 55165  | -2.21241068  | 0.00184561  |
| CKAP2L   | 150468 | -2.226629685 | 0.000893097 |
| PTTG2    | 10744  | -2.265265006 | 0.005031919 |
| DTL      | 51514  | -2.265383662 | 0.000637108 |
| PTTG1    | 9232   | -2.269400851 | 0.007900283 |
| MT1B     | 4490   | -2.316534232 | 0.002141562 |
| CENPF    | 1063   | -2.319085843 | 0.000618507 |
| FAM83D   | 81610  | -2.34702184  | 0.001288893 |
| NUSAP1   | 51203  | -2.376805175 | 0.00232285  |
| ANLN     | 54443  | -2.409379488 | 0.001603387 |
| PKMYT1   | 9088   | -2.409716678 | 0.004343686 |
| BUB1     | 699    | -2.437358525 | 0.001304642 |
| DLGAP5   | 9787   | -2.439058591 | 0.002260316 |
| CCNB2    | 9133   | -2.479020953 | 0.005029069 |
| MT2A     | 4502   | -2.498059666 | 4.23E-05    |
| SHCBP1   | 79801  | -2.530690488 | 0.000853659 |
| TOP2A    | 7153   | -2.609904336 | 0.000436102 |
| ASPM     | 259266 | -2.619294004 | 0.00068986  |
| BUB1B    | 701    | -2.626176577 | 0.000726711 |
| HIST1H3B | 8358   | -2.639067078 | 0.001683706 |
| CDCA2    | 157313 | -2.640938023 | 0.001049724 |
| SPAG5    | 10615  | -2.654236891 | 0.001726194 |
| CDC45    | 8318   | -2.665312798 | 0.000780816 |
| TYMS     | 7298   | -2.676786249 | 0.000989529 |
| KIF2C    | 11004  | -2.688348373 | 0.00383838  |
| TFPI2    | 7980   | -2.763196065 | 0.001390473 |
| CDK1     | 983    | -2.820253079 | 0.00039738  |
| SPC25    | 57405  | -2.865355104 | 0.001032095 |
| HIST2H3A | 333932 | -2.900042209 | 0.001173042 |
| CDCA8    | 55143  | -2.90365038  | 0.001247398 |
| HJURP    | 55355  | -2.913131487 | 0.001281274 |
| NDC80    | 10403  | -3.122725818 | 0.000534444 |
| PBK      | 55872  | -3.174156991 | 0.00061894  |
| KIAA0101 | 9768   | -3.257597822 | 0.001937735 |
| BIRC5    | 332    | -3.26589343  | 0.004319621 |
| HMMR     | 3161   | -3.33551709  | 0.000634237 |
| TK1      | 7083   | -3.35122648  | 0.002337127 |
| UBE2C    | 11065  | -3.552112042 | 0.001653501 |

**Table S5 Differentially expressed genes y8-y4**

| <b>Gene Symbol</b> | <b>Gene ID</b> | <b>logFC</b> | <b>p-value</b> |
|--------------------|----------------|--------------|----------------|
| COL4A4             | 1286           | 2.775425969  | 0.002428801    |
| GREM1              | 26585          | 2.413316514  | 0.003297844    |
| DPP4               | 1803           | 2.331557288  | 0.004782886    |
| PCDH10             | 57575          | 2.189433346  | 0.000506655    |
| OXTR               | 5021           | 1.972045329  | 0.005649192    |
| MGARP              | 84709          | 1.89348281   | 0.001528563    |
| BHLHE41            | 79365          | 1.809188653  | 0.004629083    |
| LOC100507421       | 100507421      | 1.776044382  | 1.03E-05       |
| SPP1               | 6696           | 1.706906057  | 0.000554851    |
| TMEM130            | 222865         | 1.701759833  | 0.003320903    |
| GPRC5B             | 51704          | 1.673445219  | 0.000104653    |
| TNFRSF11B          | 4982           | 1.655984195  | 0.005713973    |
| HIST1H1C           | 3006           | 1.559514346  | 0.001589465    |
| CAMK2N1            | 55450          | 1.550198295  | 0.005495593    |
| CNIH3              | 149111         | 1.54148918   | 0.003321814    |
| EPHA5              | 2044           | 1.479887981  | 0.001955426    |
| THEMIS             | 387357         | 1.463707925  | 0.001284814    |
| NR3C2              | 4306           | 1.367270421  | 0.000788215    |
| MYO1D              | 4642           | 1.327571219  | 0.00338965     |
| OSBPL8             | 114882         | 1.310527499  | 0.000255345    |
| CDKN2A             | 1029           | 1.260502441  | 0.001598076    |
| MME                | 4311           | 1.205851715  | 0.006108295    |
| ITGA4              | 3676           | 1.191938055  | 0.002381832    |
| ARMC9              | 80210          | 1.183146879  | 0.009128027    |
| SLC7A14            | 57709          | 1.180324696  | 0.002391492    |
| NR2F1              | 7025           | 1.170782284  | 0.003889915    |
| FHOD3              | 80206          | 1.163508328  | 0.004289562    |
| ABCA3              | 21             | 1.130006586  | 0.006851439    |
| C21orf7            | 56911          | 1.115702392  | 0.000877461    |
| SERPINB2           | 5055           | 1.085770181  | 0.001900588    |
| CALB2              | 794            | 1.083068134  | 6.16E-05       |
| LRP12              | 29967          | 1.066645758  | 0.006325618    |
| SDPR               | 8436           | 1.045012855  | 0.000776189    |
| ANKH               | 56172          | 1.024162337  | 0.002287455    |
| CACNA2D1           | 781            | 1.009056259  | 0.000619972    |
| RSPO3              | 84870          | 1.00823341   | 0.009078013    |
| NADKD1             | 133686         | 0.955969299  | 0.00375042     |
| PHACTR2            | 9749           | 0.951819541  | 3.22E-05       |
| FRMPD4             | 9758           | 0.935279035  | 0.002865617    |
| SLC9A7P1           | 121456         | 0.933589817  | 0.00089318     |
| FGFR1              | 2260           | 0.917930649  | 3.95E-06       |

|              |           |             |             |
|--------------|-----------|-------------|-------------|
| SLC16A6      | 9120      | 0.907410641 | 0.005396236 |
| TXNRD1       | 7296      | 0.900965819 | 0.007596424 |
| CSGALNACT2   | 55454     | 0.892407064 | 0.00028377  |
| HIST1H1E     | 3008      | 0.882412078 | 0.006660187 |
| ADAM10       | 102       | 0.852514078 | 0.000193668 |
| SCN9A        | 6335      | 0.84863489  | 0.005292539 |
| MECOM        | 2122      | 0.845382968 | 9.28E-05    |
| PGRMC2       | 10424     | 0.839496823 | 0.007897643 |
| LOC100134240 | 100134240 | 0.825364267 | 0.008558774 |
| SLC43A2      | 124935    | 0.814405395 | 0.009136759 |
| HIST1H2BK    | 85236     | 0.811198885 | 0.003437926 |
| HSD17B12     | 51144     | 0.807597149 | 0.001907308 |
| SLC2A10      | 81031     | 0.788025635 | 0.000642805 |
| DNAJB4       | 11080     | 0.776661002 | 0.000954087 |
| MYO5A        | 4644      | 0.774503453 | 0.001031679 |
| PUM2         | 23369     | 0.773440675 | 0.000795941 |
| ATP13A3      | 79572     | 0.773083367 | 0.000919646 |
| ZNF219       | 51222     | 0.769600645 | 0.008663195 |
| SLC9A7       | 84679     | 0.76398086  | 0.004589057 |
| CHPF         | 79586     | 0.761962087 | 0.001193229 |
| CCND1        | 595       | 0.758916176 | 0.004210991 |
| RHOQ         | 23433     | 0.757413457 | 0.000439064 |
| SNX18        | 112574    | 0.756756137 | 0.006447969 |
| SERPINE2     | 5270      | 0.756109826 | 0.007847628 |
| SCYL2        | 55681     | 0.753520854 | 0.004670513 |
| SAMD12       | 401474    | 0.750774171 | 0.00084056  |
| MYOF         | 26509     | 0.746298262 | 0.004547112 |
| ASCC3        | 10973     | 0.730415727 | 0.004963853 |
| GOLIM4       | 27333     | 0.725589484 | 0.001724781 |
| HIST2H2AA4   | 723790    | 0.724300039 | 0.008026254 |
| REST         | 5978      | 0.724195511 | 0.001132982 |
| HIST1H2BL    | 8340      | 0.721918279 | 0.004436893 |
| GSG1         | 83445     | 0.720526271 | 0.000954345 |
| HIST1H2BC    | 8347      | 0.716544147 | 0.00599014  |
| HIST1H2BG    | 8339      | 0.714649993 | 0.003163229 |
| LYN          | 4067      | 0.706710167 | 0.007568564 |
| SLC17A5      | 26503     | 0.701055865 | 0.006808267 |
| HIST1H2BO    | 8348      | 0.696613671 | 0.005335763 |
| SH3KBP1      | 30011     | 0.695139684 | 0.002629092 |
| CLDN14       | 23562     | 0.687161651 | 0.00725488  |
| NBEAL1       | 65065     | 0.677720405 | 0.005615853 |
| CMTM4        | 146223    | 0.677273919 | 0.003084292 |
| FNIP1        | 96459     | 0.676521893 | 0.002211184 |
| FRYL         | 285527    | 0.674747534 | 0.000934136 |
| UBL3         | 5412      | 0.674645905 | 0.004533551 |

|              |           |             |             |
|--------------|-----------|-------------|-------------|
| HIST1H2BH    | 8345      | 0.670824907 | 0.006945383 |
| ANTXR2       | 118429    | 0.669185605 | 0.001965068 |
| EDEM3        | 80267     | 0.666823026 | 0.001541002 |
| BMPER        | 168667    | 0.664848201 | 0.009624986 |
| DLG1         | 1739      | 0.658223866 | 7.82E-05    |
| ATP10D       | 57205     | 0.657414972 | 0.004294166 |
| DYNLT3       | 6990      | 0.656194629 | 0.008393284 |
| MAGT1        | 84061     | 0.655881678 | 0.001877699 |
| HIST1H2BM    | 8342      | 0.655667088 | 0.003261765 |
| MMP14        | 4323      | 0.654764493 | 0.003481385 |
| FAM177A1     | 283635    | 0.651462784 | 7.53E-05    |
| SON          | 6651      | 0.645246955 | 0.002435465 |
| TOB1         | 10140     | 0.643812238 | 0.002653282 |
| CHST2        | 9435      | 0.641226803 | 0.003515695 |
| SSR3         | 6747      | 0.6376272   | 0.006036747 |
| SLITRK1      | 114798    | 0.63547848  | 0.005384918 |
| HIST1H2AD    | 3013      | 0.63199627  | 0.006074243 |
| ND4L         | 4539      | 0.626611367 | 0.009742962 |
| FICD         | 11153     | 0.625461125 | 0.001628179 |
| MAN1A2       | 10905     | 0.621500095 | 0.005619643 |
| HIST1H2BB    | 3018      | 0.621343412 | 0.005848641 |
| KIAA1143     | 57456     | 0.620054318 | 0.003677715 |
| LMTK2        | 22853     | 0.619205083 | 0.001556086 |
| NAMPT        | 10135     | 0.614015148 | 0.006991905 |
| CYLD         | 1540      | 0.611106689 | 0.005314121 |
| RRM2B        | 50484     | 0.609764801 | 0.002178918 |
| SUN1         | 23353     | 0.607837348 | 0.001068177 |
| NEXN         | 91624     | 0.60535261  | 0.000424475 |
| DPEP3        | 64180     | 0.604241552 | 0.008221546 |
| PAGE2        | 203569    | 0.603789508 | 0.002799735 |
| MBNL1        | 4154      | 0.602079083 | 0.004262623 |
| SECISBP2L    | 9728      | 0.596952144 | 0.000993891 |
| KLHL11       | 55175     | 0.596623018 | 0.003418268 |
| LOC100129447 | 100129447 | 0.596147402 | 0.004985234 |
| HIST1H2BD    | 3017      | 0.596075278 | 0.009238323 |
| GPC1         | 2817      | 0.593213775 | 0.007341147 |
| HSP90AA1     | 3320      | 0.592880412 | 0.009960367 |
| PPP1R2       | 5504      | 0.591869804 | 0.007786729 |
| PAWR         | 5074      | 0.589346146 | 0.002903041 |
| LOC285178    | 285178    | 0.587891489 | 0.000264328 |
| ATP2B4       | 493       | 0.585610382 | 0.002644698 |
| -            | 652191    | 0.58358861  | 8.84E-05    |
| GNPTAB       | 79158     | 0.582628049 | 0.005231889 |
| ZNF365       | 22891     | 0.582051487 | 0.008942916 |
| MARCH9       | 92979     | 0.581539698 | 0.007048183 |

|         |        |              |             |
|---------|--------|--------------|-------------|
| HMGN4   | 10473  | -0.582671813 | 0.008440337 |
| C5orf54 | 63920  | -0.588170066 | 0.000224279 |
| CEP192  | 55125  | -0.58978134  | 0.002911419 |
| HEYL    | 26508  | -0.593635005 | 0.002729481 |
| AADAT   | 51166  | -0.595116424 | 0.002503892 |
| ZRANB2  | 9406   | -0.597532871 | 0.005496127 |
| RPS8    | 6202   | -0.600057362 | 0.004732613 |
| C5      | 727    | -0.600200537 | 0.000193002 |
| CCDC14  | 64770  | -0.611862103 | 0.002362572 |
| ARL6IP6 | 151188 | -0.617634243 | 0.006638375 |
| FAM46B  | 115572 | -0.621268473 | 0.006493704 |
| WDYHV1  | 55093  | -0.623327332 | 0.002538461 |
| KAT2A   | 2648   | -0.626726518 | 0.005805754 |
| UGDH    | 7358   | -0.629443274 | 0.003154039 |
| GDF6    | 392255 | -0.632556435 | 0.008912144 |
| DDX5    | 1655   | -0.636999604 | 0.008503356 |
| RPS3A   | 6189   | -0.637706586 | 0.004424148 |
| RMI1    | 80010  | -0.658016878 | 1.62E-05    |
| PTPLAD2 | 401494 | -0.66673421  | 0.000128985 |
| PIF1    | 80119  | -0.67484199  | 0.003386396 |
| GBP1    | 2633   | -0.68645745  | 0.004078499 |
| PTX3    | 5806   | -0.699559683 | 0.00794913  |
| HOXC4   | 3221   | -0.701480185 | 0.005132006 |
| GMNN    | 51053  | -0.706259586 | 0.005631567 |
| RFC4    | 5984   | -0.730045794 | 0.005597717 |
| EEF1A1  | 1915   | -0.733024855 | 0.000714429 |
| H2BFM   | 286436 | -0.737462966 | 6.03E-05    |
| HNRNPH1 | 3187   | -0.742592918 | 0.000939111 |
| SOCS3   | 9021   | -0.762916881 | 0.001903239 |
| CDC7    | 8317   | -0.77852524  | 0.002414075 |
| MEX3A   | 92312  | -0.781402299 | 0.002968507 |
| POLG2   | 11232  | -0.784916517 | 0.002295783 |
| LBR     | 3930   | -0.798675324 | 0.008714255 |
| SMC4    | 10051  | -0.862654045 | 0.007473776 |
| OSBPL7  | 114881 | -0.929035562 | 0.001371432 |
| HMGB2   | 3148   | -0.99286666  | 0.006127742 |
| TMSB15B | 286527 | -0.996689619 | 0.003762001 |
| OLFML3  | 56944  | -1.005367141 | 0.000151804 |
| SNHG1   | 23642  | -1.025509832 | 0.004342439 |
| LCTL    | 197021 | -1.040764971 | 0.004658326 |
| ADCY3   | 109    | -1.090822861 | 0.007969221 |
| MEOX2   | 4223   | -1.165840526 | 0.003338562 |
| PPAP2B  | 8613   | -1.417181117 | 0.001913285 |
| SCRG1   | 11341  | -1.885796801 | 0.008979601 |



**Table S6 Gene ontology enrichment analysis****o4-y4 downregulated differentially expressed genes**

| <b>GO ID</b> | <b>GO Term</b>                                                                            | <b>-log10 (p-value)</b> |
|--------------|-------------------------------------------------------------------------------------------|-------------------------|
| GO:0048704   | bone marrow development                                                                   | 9.954498008             |
| GO:0009952   | pentose-phosphate shunt, oxidative branch                                                 | 3.732629998             |
| GO:0009051   | cranial nerve development                                                                 | 3.314690725             |
| GO:0015920   | icosanoid biosynthetic process                                                            | 3.314690725             |
| GO:0002504   | cartilage development                                                                     | 3.255570841             |
| GO:0048592   | morphogenesis of an epithelial sheet                                                      | 3.101467573             |
| GO:0021615   | negative regulation of transcription from RNA polymerase II promoter                      | 2.843958595             |
| GO:0019322   | response to virus                                                                         | 2.843958595             |
| GO:0048539   | mRNA splice site selection                                                                | 2.843958595             |
| GO:0000122   | phagocytosis, recognition                                                                 | 2.843261579             |
| GO:0030878   | transmembrane receptor protein tyrosine phosphatase signaling pathway                     | 2.813802273             |
| GO:0034097   | positive regulation of smoothened signaling pathway                                       | 2.721693693             |
| GO:0031100   | thyroid gland development                                                                 | 2.691955972             |
| GO:0006376   | positive regulation of chondrocyte differentiation                                        | 2.589130796             |
| GO:0035024   | pentose biosynthetic process                                                              | 2.549306147             |
| GO:0045880   | palate development                                                                        | 2.549306147             |
| GO:0040007   | anterior/posterior pattern formation                                                      | 2.348074064             |
| GO:0051216   | lipopolysaccharide transport                                                              | 2.339564605             |
| GO:0006910   | protein targeting to membrane                                                             | 2.33382333              |
| GO:0032490   | detection of molecule of bacterial origin                                                 | 2.33382333              |
| GO:0006646   | T-helper 2 cell differentiation                                                           | 2.33382333              |
| GO:0009615   | antigen processing and presentation of peptide or polysaccharide antigen via MHC class II | 2.314188032             |
| GO:0032355   | glossopharyngeal nerve morphogenesis                                                      | 2.250522885             |
| GO:0021545   | eye morphogenesis                                                                         | 2.248992486             |
| GO:0008283   | regulation of transcription                                                               | 2.24310108              |
| GO:0060021   | phosphatidylethanolamine biosynthetic process                                             | 2.242059359             |
| GO:0046456   | response to estradiol stimulus                                                            | 2.242059359             |
| GO:0032496   | response to lipopolysaccharide                                                            | 2.210497597             |
| GO:0006612   | response to cytokine stimulus                                                             | 2.195169021             |
| GO:0060216   | nucleosome disassembly                                                                    | 2.164086353             |
| GO:0006337   | negative regulation of Rho protein signal transduction                                    | 2.164086353             |
| GO:0045879   | definitive hemopoiesis                                                                    | 2.164086353             |
| GO:0045449   | cell proliferation                                                                        | 2.129610309             |
| GO:0007185   | growth                                                                                    | 2.02430091              |
| GO:0002011   | rhombomere development                                                                    | 2.02430091              |
| GO:0032332   | organ regeneration                                                                        | 2.02430091              |
| GO:0045064   | negative regulation of smoothened signaling pathway                                       | 2.02430091              |
| GO:0021546   | embryonic skeletal system morphogenesis                                                   | 2.02430091              |

**o4-y4 upregulated differentially expressed genes**

| <b>GO ID</b> | <b>GO Term</b>                                            | <b>-log10 (p-value)</b> |
|--------------|-----------------------------------------------------------|-------------------------|
| GO:0007257   | negative regulation of glucose import                     | 3.461440883             |
| GO:0009612   | wound healing                                             | 3.313343248             |
| GO:0006884   | potassium ion transport                                   | 3.129024927             |
| GO:0046627   | regulation of neuron apoptosis                            | 2.850951329             |
| GO:0046325   | activation of JUN kinase activity                         | 2.53110174              |
| GO:0048703   | positive regulation of smooth muscle cell proliferation   | 2.53110174              |
| GO:0008629   | positive regulation of cell-matrix adhesion               | 2.381524947             |
| GO:0006284   | embryonic viscerocranium morphogenesis                    | 2.278485974             |
| GO:0050930   | negative regulation of insulin receptor signaling pathway | 2.268236671             |
| GO:0043523   | induction of apoptosis by intracellular signals           | 2.239094211             |
| GO:0018209   | response to mechanical stimulus                           | 2.190503059             |
| GO:0048661   | base-excision repair                                      | 2.183180368             |
| GO:0001954   | peptidyl-serine modification                              | 2.16318591              |
| GO:0042060   | induction of positive chemotaxis                          | 2.138633722             |
| GO:0006813   | cell volume homeostasis                                   | 2.071513398             |

**o8-o4 downregulated differentially expressed genes**

| <b>GO ID</b> | <b>GO Term</b>                                                                                 | <b>-log10 (p-value)</b> |
|--------------|------------------------------------------------------------------------------------------------|-------------------------|
| GO:0051301   | DNA ligation                                                                                   | 49.62117451             |
| GO:0007067   | cell cycle                                                                                     | 37.54296902             |
| GO:0006260   | G2/M transition DNA damage checkpoint                                                          | 29.95785791             |
| GO:0007059   | mitosis                                                                                        | 14.58070067             |
| GO:0006297   | anaphase-promoting complex-dependent proteasomal ubiquitin-dependent protein catabolic process | 12.56021579             |
| GO:0007049   | female meiosis I                                                                               | 10.62142193             |
| GO:0007018   | meiosis                                                                                        | 9.950277541             |
| GO:0006270   | microtubule polymerization                                                                     | 9.111418711             |
| GO:0008283   | histone exchange                                                                               | 8.723138512             |
| GO:0006281   | interspecies interaction between organisms                                                     | 8.328359696             |
| GO:0006268   | regulation of S phase                                                                          | 8.25893056              |
| GO:0007126   | lagging strand elongation                                                                      | 8.253440019             |
| GO:0007051   | spindle organization                                                                           | 7.867818721             |
| GO:0007076   | regulation of mitosis                                                                          | 7.431877304             |
| GO:0000070   | phosphoinositide-mediated signaling                                                            | 6.97187414              |
| GO:0000724   | negative regulation of ubiquitin-protein ligase activity during mitotic cell cycle             | 6.952717699             |
| GO:0007093   | double-strand break repair                                                                     | 6.764339469             |
| GO:0048015   | DNA strand elongation during DNA replication                                                   | 6.708212917             |
| GO:0000079   | organ regeneration                                                                             | 6.61604112              |
| GO:0007052   | mitotic spindle organization                                                                   | 6.445423823             |
| GO:0006334   | mitotic metaphase                                                                              | 6.283456781             |
| GO:0007094   | DNA recombination                                                                              | 6.014250744             |
| GO:0007080   | mitotic chromosome condensation                                                                | 6.014250744             |
| GO:0008608   | DNA damage checkpoint                                                                          | 5.549278043             |
| GO:0000085   | deoxyribonucleotide biosynthetic process                                                       | 5.177070815             |
| GO:0000731   | regulation of ubiquitin-protein ligase activity during mitotic cell cycle                      | 4.635428655             |
| GO:0006310   | G1/S transition of mitotic cell cycle                                                          | 4.445980755             |
| GO:0051382   | meiotic spindle organization                                                                   | 4.426999048             |
| GO:0034501   | microtubule-based movement                                                                     | 4.426999048             |
| GO:0051258   | centrosome separation                                                                          | 4.219871426             |
| GO:0001556   | deoxyribonucleoside diphosphate metabolic process                                              | 4.063147666             |
| GO:0000089   | maintenance of DNA methylation                                                                 | 4.03595971              |
| GO:0006302   | oocyte maturation                                                                              | 3.791302015             |
| GO:0010212   | female gonad development                                                                       | 3.761183256             |
| GO:0000132   | response to organophosphorus                                                                   | 3.741823315             |
| GO:0031145   | nucleosome assembly                                                                            | 3.481854497             |
| GO:0071173   | cell cycle checkpoint                                                                          | 3.360945703             |
| GO:0006271   | regulation of DNA metabolic process                                                            | 3.352399921             |
| GO:0051987   | chromosome organization                                                                        | 3.346649198             |
| GO:0006335   | establishment of mitotic spindle orientation                                                   | 3.346649198             |
| GO:0007079   | mitotic cell cycle checkpoint                                                                  | 3.346649198             |
| GO:0000022   | regulation of microtubule polymerization or depolymerization                                   | 3.346649198             |
| GO:0006288   | positive regulation of mitotic metaphase/anaphase transition                                   | 3.346649198             |
| GO:0051782   | regulation of chromosome segregation                                                           | 3.346649198             |
| GO:0000082   | pyrimidine deoxyribonucleotide biosynthetic process                                            | 3.294824033             |
| GO:0033205   | regulation of cyclin-dependent protein kinase activity                                         | 3.139212125             |
| GO:0007019   | meiosis I                                                                                      | 3.130782026             |
| GO:0051276   | cell division                                                                                  | 3.097195065             |
| GO:0007140   | nucleotide-excision repair, DNA gap filling                                                    | 3.046279122             |

|            |                                                                                                                 |             |
|------------|-----------------------------------------------------------------------------------------------------------------|-------------|
| GO:0007096 | DNA damage response, signal transduction by p53 class mediator resulting in transcription of p21 class mediator | 2.991175204 |
| GO:0046785 | spindle assembly checkpoint                                                                                     | 2.991175204 |
| GO:0000086 | response to ionizing radiation                                                                                  | 2.966391257 |
| GO:0031110 | chromatin assembly or disassembly                                                                               | 2.890674151 |
| GO:0034508 | microtubule depolymerization                                                                                    | 2.884294327 |
| GO:0048478 | mitotic sister chromatid segregation                                                                            | 2.875683467 |
| GO:0046599 | double-strand break repair via homologous recombination                                                         | 2.875683467 |
| GO:0031055 | DNA repair                                                                                                      | 2.875683467 |
| GO:0045842 | base-excision repair, DNA ligation                                                                              | 2.875683467 |
| GO:0007144 | mismatch repair                                                                                                 | 2.875683467 |
| GO:0010216 | attachment of spindle microtubules to kinetochore                                                               | 2.875683467 |
| GO:0006273 | spindle assembly                                                                                                | 2.875683467 |
| GO:0009221 | centrosome organization                                                                                         | 2.875683467 |
| GO:0031572 | positive regulation of cell cycle process                                                                       | 2.859730332 |
| GO:0007127 | regulation of DNA replication                                                                                   | 2.775234738 |
| GO:0030261 | mitotic spindle elongation                                                                                      | 2.766330606 |
| GO:0007088 | mitotic chromosome movement towards spindle pole                                                                | 2.765319927 |
| GO:0031100 | DNA unwinding during replication                                                                                | 2.750270821 |
| GO:0051436 | mitotic cell cycle spindle assembly checkpoint                                                                  | 2.739205048 |
| GO:0006333 | G2/M transition of mitotic cell cycle                                                                           | 2.624823289 |
| GO:0007050 | cell cycle arrest                                                                                               | 2.623002427 |
| GO:0043486 | DNA replication-dependent nucleosome assembly                                                                   | 2.580798268 |
| GO:0046683 | traversing start control point of mitotic cell cycle                                                            | 2.580798268 |
| GO:0009186 | cell proliferation                                                                                              | 2.580798268 |
| GO:0000212 | protein localization to kinetochore                                                                             | 2.580798268 |
| GO:0051299 | replication fork protection                                                                                     | 2.580798268 |
| GO:0051329 | cytokinesis                                                                                                     | 2.464867585 |
| GO:0000075 | chromosome condensation                                                                                         | 2.438628547 |
| GO:0051297 | regulation of centriole replication                                                                             | 2.418334926 |
| GO:0000077 | chromatin remodeling at centromere                                                                              | 2.412554649 |
| GO:0009263 | centromere complex assembly                                                                                     | 2.370711345 |
| GO:0051567 | inner cell mass cell proliferation                                                                              | 2.365083554 |
| GO:0001833 | male meiosis                                                                                                    | 2.365083554 |
| GO:0045070 | negative regulation of cell division                                                                            | 2.365083554 |
| GO:0090068 | DNA replication initiation                                                                                      | 2.357303977 |
| GO:0051052 | positive regulation of viral genome replication                                                                 | 2.353198444 |
| GO:0044419 | G2 phase of mitotic cell cycle                                                                                  | 2.339188705 |
| GO:0006298 | positive regulation of protein ubiquitination                                                                   | 2.213324599 |
| GO:0051225 | S phase                                                                                                         | 2.213324599 |
| GO:0051439 | regulation of exit from mitosis                                                                                 | 2.208817757 |
| GO:0051983 | DNA replication                                                                                                 | 2.200763672 |
| GO:0007089 | mitotic metaphase plate congression                                                                             | 2.195115535 |
| GO:0000910 | histone H3-K9 methylation                                                                                       | 2.13352929  |
| GO:0031398 | kinetochore assembly                                                                                            | 2.1251883   |
| GO:0006275 | protein polymerization                                                                                          | 2.066075171 |
| GO:0051320 | DNA synthesis during DNA repair                                                                                 | 2.062434456 |
| GO:0006266 | cytokinesis during cell cycle                                                                                   | 2.060707075 |
| GO:0006978 | positive regulation of attachment of spindle microtubules to kinetochore                                        | 2.055099912 |
| GO:0007276 | gamete generation                                                                                               | 2.027847743 |
| GO:0008585 | interphase of mitotic cell cycle                                                                                | 2.024654164 |
| GO:0033261 | chromosome segregation                                                                                          | 2.021538026 |

**o8-o4 upregulated differentially expressed genes**

| GO ID      | GO Term                                                   | -log10 (p-value) |
|------------|-----------------------------------------------------------|------------------|
| GO:0006334 | regulation of cell size                                   | 6.828841934      |
| GO:0043627 | regulation of collagen biosynthetic process               | 3.205271533      |
| GO:0045765 | cellular component movement                               | 3.146254413      |
| GO:0006123 | regulation of osteoblast differentiation                  | 2.947672182      |
| GO:0015807 | cell death                                                | 2.789766173      |
| GO:0032026 | aging                                                     | 2.631610543      |
| GO:0051491 | negative regulation of epithelial cell differentiation    | 2.631610543      |
| GO:0060391 | response to estrogen stimulus                             | 2.631610543      |
| GO:0030857 | sterol biosynthetic process                               | 2.509746715      |
| GO:0008219 | extracellular matrix organization                         | 2.492225612      |
| GO:0030198 | positive regulation of filopodium assembly                | 2.422986447      |
| GO:0032965 | regulation of transporter activity                        | 2.403674534      |
| GO:0060021 | mitochondrial electron transport, cytochrome c to oxygen  | 2.27793879       |
| GO:0032409 | positive regulation of SMAD protein nuclear translocation | 2.205703807      |
| GO:0007568 | nucleosome assembly                                       | 2.157006854      |
| GO:0008361 | response to glucocorticoid stimulus                       | 2.145261203      |
| GO:0006928 | palate development                                        | 2.076379907      |
| GO:0007422 | peripheral nervous system development                     | 2.07429423       |
| GO:0016126 | response to magnesium ion                                 | 2.07429423       |
| GO:0051384 | L-amino acid transport                                    | 2.060640908      |
| GO:0045667 | regulation of angiogenesis                                | 2.014214784      |

**y8-y4 downregulated differentially expressed genes**

| GO ID      | GO Term                                                                                       | -log10 (p-value) |
|------------|-----------------------------------------------------------------------------------------------|------------------|
| GO:0006334 | G1/S transition checkpoint                                                                    | 11.1757476       |
| GO:0030514 | positive regulation of synapse structural plasticity                                          | 3.511966725      |
| GO:0016584 | hemopoietic stem cell proliferation                                                           | 3.135825183      |
| GO:0030889 | negative regulation of collateral sprouting of intact axon in response to injury              | 2.991707006      |
| GO:0032026 | positive regulation of nitric-oxide synthase biosynthetic process                             | 2.991707006      |
| GO:0006986 | response to anoxia                                                                            | 2.989607308      |
| GO:0001953 | negative regulation of odontogenesis of dentine-containing tooth                              | 2.76164031       |
| GO:0050851 | regulation of cell adhesion                                                                   | 2.614457979      |
| GO:0002688 | sialic acid transport                                                                         | 2.504415596      |
| GO:0030866 | response to estrogen stimulus                                                                 | 2.504415596      |
| GO:0045124 | localization                                                                                  | 2.368923907      |
| GO:0051179 | response to organic nitrogen                                                                  | 2.323770841      |
| GO:0034605 | antigen receptor-mediated signaling pathway                                                   | 2.308777267      |
| GO:0051963 | positive regulation of glial cell proliferation                                               | 2.308777267      |
| GO:0043627 | negative regulation of cell-matrix adhesion                                                   | 2.304335058      |
| GO:0031575 | cortical actin cytoskeleton organization                                                      | 2.20042695       |
| GO:0090005 | nucleosome assembly                                                                           | 2.149721696      |
| GO:0051089 | response to unfolded protein                                                                  | 2.149721696      |
| GO:0015739 | purine ribonucleoside triphosphate metabolic process                                          | 2.149721696      |
| GO:0042489 | nucleosome positioning                                                                        | 2.149721696      |
| GO:0071425 | negative regulation of B cell proliferation                                                   | 2.149721696      |
| GO:0060612 | response to magnesium ion                                                                     | 2.149721696      |
| GO:0034059 | cellular response to heat                                                                     | 2.149721696      |
| GO:0060252 | regulation of bone resorption                                                                 | 2.149721696      |
| GO:0051770 | dermatan sulfate proteoglycan biosynthetic process, polysaccharide chain biosynthetic process | 2.149721696      |
| GO:0050652 | constitutive protein ectodomain proteolysis                                                   | 2.149721696      |
| GO:0048685 | regulation of synaptogenesis                                                                  | 2.149721696      |
| GO:0051835 | negative regulation of establishment of protein localization in plasma membrane               | 2.149721696      |
| GO:0030155 | regulation of leukocyte chemotaxis                                                            | 2.143000885      |
| GO:0010243 | adipose tissue development                                                                    | 2.137651151      |
| GO:0009205 | negative regulation of BMP signaling pathway                                                  | 2.0332297        |

**y8-y4 upregulated differentially expressed genes**

| GO ID      | GO Term                                      | -log10 (p-value) |
|------------|----------------------------------------------|------------------|
| GO:0006261 | UDP-glucuronate biosynthetic process         | 3.291711322      |
| GO:0001702 | somite specification                         | 3.03623168       |
| GO:0006414 | glycyl-tRNA aminoacylation                   | 2.80541015       |
| GO:0006323 | gastrulation with mouth forming second       | 2.64907609       |
| GO:0010760 | DNA replication                              | 2.622433831      |
| GO:0006260 | UDP-glucose metabolic process                | 2.326775762      |
| GO:0006288 | base-excision repair, DNA ligation           | 2.321906455      |
| GO:0006426 | translational elongation                     | 2.321906455      |
| GO:0001878 | negative regulation of macrophage chemotaxis | 2.321906455      |
| GO:0051276 | DNA packaging                                | 2.232378041      |
| GO:0006065 | response to yeast                            | 2.146317646      |
| GO:0001757 | chromosome organization                      | 2.021881188      |
| GO:0006011 | DNA-dependent DNA replication                | 2.021881188      |
